# Supplementary material for: A highly efficient and recyclable CuI@UiO-67-bpy catalyst for direct sp2 C–H arylation of azoles
Source: Royal Society of Chemistry journal article supplement (doi:10.1039/d4nj03726j), 2024-01-01
Supplement: d4nj03726j1.pdf [file d4nj03726j1.pdf]

**Electronic Supplementary Information (ESI) for:**

**A highly efficient and recyclable CuI@UiO-67-bpy catalyst for direct  $sp^2$  C–H arylation of azoles<sup>†</sup>**

Tingting Li,<sup>a</sup> Nan Li,<sup>a</sup> Dabin Shi<sup>a\*</sup>

*<sup>a</sup> Key Laboratory of Biocatalysis & Chiral Drug Synthesis of Guizhou Province, School of Pharmacy, Zunyi Medical University, Zunyi 563000, P. R. China.*

**Contents**

|                                                        |    |
|--------------------------------------------------------|----|
| 1. Synthesis of H <sub>2</sub> bpy.....                | 2  |
| 2. IR spectra of MOF I and MOF II.....                 | 2  |
| 3. XPS survey of MOF I and MOF II.....                 | 2  |
| 4. XPS spectra of N 1s region of MOF I and MOF II..... | 3  |
| 5. TGA curves of MOF I and MOF II.....                 | 3  |
| 6. SEM image of reused MOF II.....                     | 3  |
| 7. Characterization of compound 3.....                 | 4  |
| 8. Characterization of compound 7.....                 | 29 |

---

\* Corresponding author: Prof. Dabin shi

E-mail: sdb007.student@sina.com

## 1. Synthesis of H<sub>2</sub>bpy

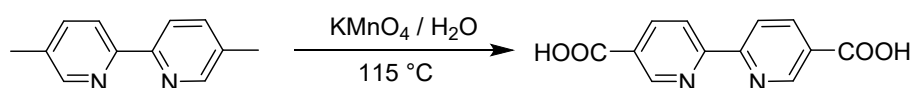

A mixture of 5,5'-dimethyl-2,2'-bipyridine (1 eq, 4 g, 21.7 mmol) and potassium permanganate (35 eq, 24g, 751.8 mmol) in 250 mL of H<sub>2</sub>O was heated for 2 h (115 °C), cooled at rt and filtrated trough celite. The filtrate was cooled to 4 °C and acidified with HCl until precipitation of a white solid, which was filtrated, washed with water, and lyophilized to afford the desired product in a 90% yield (4.7 g). <sup>1</sup>H NMR (400 MHz, DMSO-*d*<sub>6</sub>): δ 9.20 (s, 2H), 8.57 (d, *J* = 7.8 Hz, 2H), 8.45 (d, *J* = 8.1 Hz, 2H); <sup>13</sup>C NMR (101 MHz, DMSO-*d*<sub>6</sub>): 166.1, 157.4, 150.4, 138.6, 127.2, 121.2.

## 2. IR spectra of MOF I and MOF II

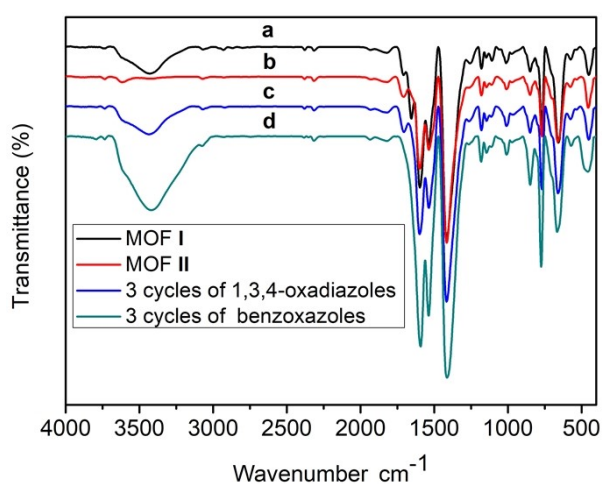

**Fig. S1** IR spectra, (a) MOF I as-synthesized pristine sample, (b) MOF II as-synthesized pristine sample, (c) MOF II after 3 runs catalysis recycle for C5 arylation of 1,3,4-oxadiazoles, (d) MOF II after 3 runs catalysis recycle for C2 arylation of benzoxazoles.

## 3. XPS survey of MOF I and MOF II

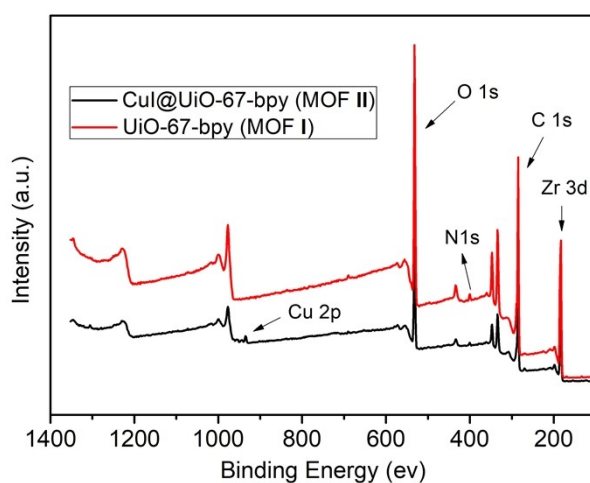

**Fig. S2** Complete analysis of MOF I and MOF II through XPS survey.

#### 4. XPS spectra of N 1s region of MOF I and MOF II

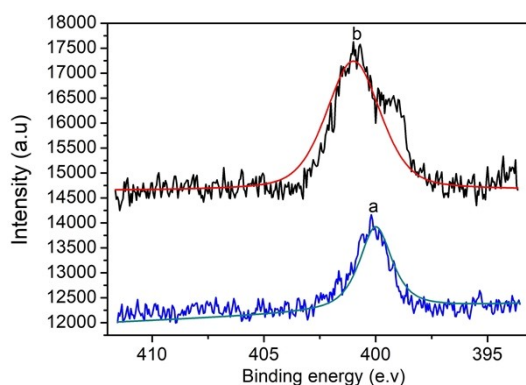

Fig. S3 XPS spectra of the N 1s region for (a) MOF I and (b) MOF II.

#### 5. TGA curves of MOF I and MOF II

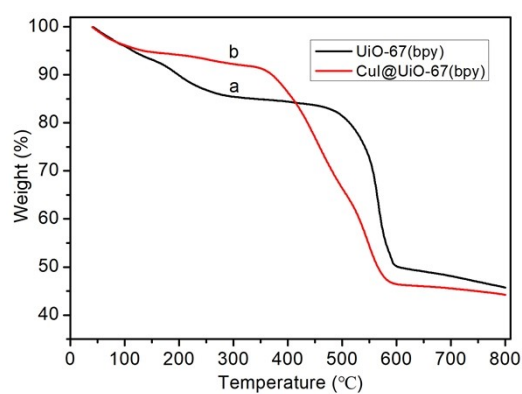

Fig. S4 TGA curves of I MOF (a) and MOF II (b) recorded under argon atmosphere between 35 and 800 °C with a heating rate of 10 °C min<sup>-1</sup>.

#### 6. SEM image of reused MOF II

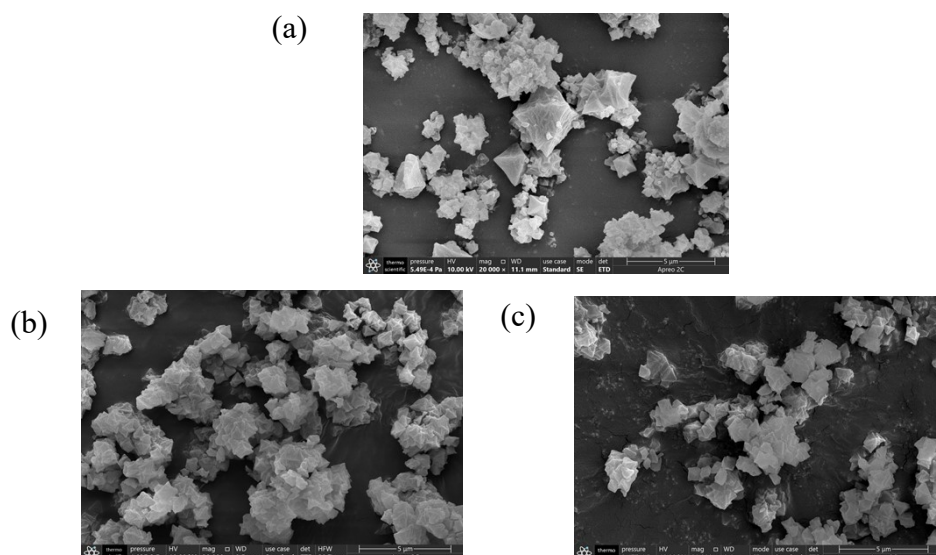

Fig. S5 (a) SEM images of MOF II before catalysis, (b) SEM images of MOF II after 3 runs catalysis recycle for C5 arylation of 1,3,4-oxadiazoles, (c) SEM images of MOF II after 3 runs catalysis recycle for C2 arylation of benzoxazoles.

## 7. Characterization of compound 3

### diphenyl-1,3,4-oxadiazole (3a)

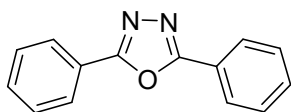

$^1\text{H}$  NMR (400 MHz,  $\text{CDCl}_3$ ):  $\delta$  8.16 – 8.11 (m, 4H), 7.59–7.49 (m, 6H);  $^{13}\text{C}$  NMR (101 MHz,  $\text{CDCl}_3$ ):  $\delta$  164.6, 131.7, 129.1, 126.9, 123.9.

### 2-phenyl-5-(*p*-tolyl)-1,3,4-oxadiazole (3b)

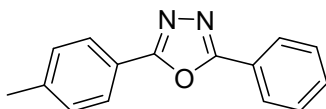

$^1\text{H}$  NMR (400 MHz,  $\text{CDCl}_3$ ):  $\delta$  8.13 – 8.10 (m, 2H), 8.01 (d,  $J = 8.0$  Hz, 2H), 7.54 – 7.48 (m, 3H), 7.31 (d,  $J = 8.0$  Hz, 2H), 2.42 (s, 3H);  $^{13}\text{C}$  NMR (101 MHz,  $\text{CDCl}_3$ ):  $\delta$  164.5, 164.1, 142.1, 131.4, 129.6, 128.8, 126.6, 123.7, 120.8, 109.8, 21.5.

### 2-phenyl-5-(*m*-tolyl)-1,3,4-oxadiazole (3c)

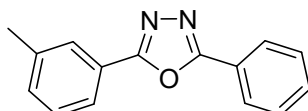

$^1\text{H}$  NMR (400 MHz,  $\text{CDCl}_3$ ):  $\delta$  8.17 – 8.09 (m, 2H), 8.00 – 7.87 (m, 2H), 7.58 – 7.48 (m, 3H), 7.41 (t,  $J = 7.6$  Hz, 1H), 7.34 (d,  $J = 7.6$  Hz, 1H), 2.44 (s, 3H);  $^{13}\text{C}$  NMR (101 MHz,  $\text{CDCl}_3$ ):  $\delta$  164.7, 164.5, 138.9, 132.5, 131.7, 129.0, 128.9, 127.4, 126.9, 124.0, 123.9, 123.7, 21.3.

### 2-(4-methoxyphenyl)-5-phenyl-1,3,4-oxadiazole (3d)

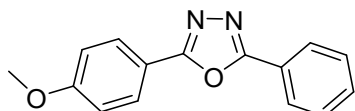

$^1\text{H}$  NMR (400 MHz,  $\text{CDCl}_3$ ):  $\delta$  8.15 – 8.09 (m, 2H), 8.08 (d,  $J = 8.9$  Hz, 2H), 7.57 – 7.48 (m, 3H), 7.02 (d,  $J = 8.9$  Hz, 2H), 3.88 (s, 3H);  $^{13}\text{C}$  NMR (101 MHz,  $\text{CDCl}_3$ ):  $\delta$  164.3, 163.9, 162.2, 131.4, 128.8, 128.6, 126.6, 123.7, 116.0, 114.3, 55.3.

### 2-(2-methoxyphenyl)-5-phenyl-1,3,4-oxadiazole (3e)

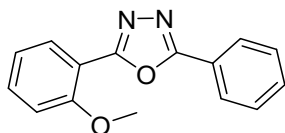

$^1\text{H}$  NMR (400 MHz,  $\text{CDCl}_3$ ):  $\delta$  8.16 – 8.08 (m, 2H), 8.00 (dd,  $J = 7.8, 1.8$  Hz, 1H), 7.57 – 7.44 (m, 4H), 7.12 – 7.02 (m, 2H), 3.97 (s, 3H);  $^{13}\text{C}$  NMR (101 MHz,  $\text{CDCl}_3$ ):  $\delta$  164.3, 163.3, 157.9, 133.2, 131.6, 130.4, 129.0, 126.9, 124.1, 120.7, 112.9, 112.0, 56.1.

### 2-(4-(*tert*-butyl) phenyl)-5-phenyl-1,3,4-oxadiazole (3f)

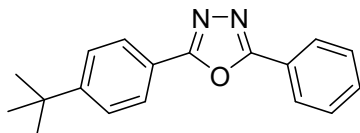

$^1\text{H}$  NMR (400 MHz,  $\text{CDCl}_3$ ):  $\delta$  8.15 – 8.10 (m, 2H), 8.05 (d,  $J = 8.5$  Hz, 2H), 7.57 – 7.48 (m, 5H), 1.35 (s, 9H);  $^{13}\text{C}$  NMR (101 MHz,  $\text{CDCl}_3$ ):  $\delta$  164.6, 164.3, 155.4, 131.6, 129.1, 126.9, 126.8, 126.1, 123.9, 121.0, 35.1, 31.1.

**2-(2-fluorophenyl)-5-phenyl-1,3,4-oxadiazole (3g)**

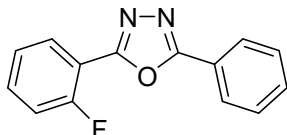

$^1\text{H}$  NMR (400 MHz,  $\text{CDCl}_3$ ):  $\delta$  8.16 – 8.11 (m, 3H), 7.59 – 7.48 (m, 4H), 7.30 (t,  $J = 8.0$  Hz, 1H), 7.27 – 7.21 (m, 1H);  $^{13}\text{C}$  NMR (101 MHz,  $\text{CDCl}_3$ ):  $\delta$  164.90, 161.41 (d,  $J = 4.9$  Hz), 159.96 (d,  $J = 258.3$  Hz), 133.50 (d,  $J = 8.5$  Hz), 131.8, 129.7, 129.1, 127.0, 124.7 (d,  $J = 3.8$  Hz), 123.7, 117.0 (d,  $J = 20.9$  Hz), 112.4 (d,  $J = 11.8$  Hz).

**2-(4-fluorophenyl)-5-phenyl-1,3,4-oxadiazole (3h)**

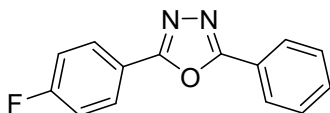

$^1\text{H}$  NMR (400 MHz,  $\text{CDCl}_3$ ):  $\delta$  8.15 – 8.07 (m, 4H), 7.57 – 7.47 (m, 3H), 7.20 (t,  $J = 8.4$  Hz, 2H);  $^{13}\text{C}$  NMR (101 MHz,  $\text{CDCl}_3$ ):  $\delta$  164.74 (d,  $J = 253.0$  Hz), 164.6, 163.7, 131.8, 129.2 (d,  $J = 8.9$  Hz), 129.1, 126.9, 123.7, 120.2 (d,  $J = 3.4$  Hz), 116.4 (d,  $J = 22.2$  Hz).

**2-(3-chlorophenyl)-5-phenyl-1,3,4-oxadiazole (3i)**

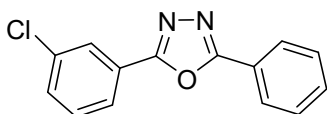

$^1\text{H}$  NMR (400 MHz,  $\text{CDCl}_3$ ):  $\delta$  8.15 – 8.08 (m, 3H), 8.01 (d,  $J = 7.5$  Hz, 1H), 7.59 – 7.42 (m, 5H);  $^{13}\text{C}$  NMR (101 MHz,  $\text{CDCl}_3$ ):  $\delta$  164.8, 163.4, 135.2, 131.9, 131.7, 130.4, 129.1, 126.9, 126.8, 125.5, 125.0, 123.6.

**2-(4-bromophenyl)-5-phenyl-1,3,4-oxadiazole (3j)**

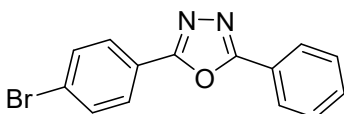

$^1\text{H}$  NMR (400 MHz,  $\text{CDCl}_3$ ):  $\delta$  8.12 (dd,  $J = 7.9, 1.7$  Hz, 2H), 7.99 (d,  $J = 8.7$  Hz, 2H), 7.66 (d,  $J = 8.7$  Hz, 2H), 7.58 – 7.49 (m, 3H);  $^{13}\text{C}$  NMR (101 MHz,  $\text{CDCl}_3$ ):  $\delta$  164.7, 163.8, 132.4, 131.9, 129.1, 128.3, 126.9, 126.4, 123.6, 122.8.

**2-(4-(trifluoromethyl) phenyl)-5-phenyl-1,3,4-oxadiazole (3k)**

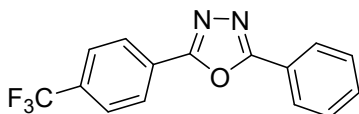

$^1\text{H}$  NMR (400 MHz,  $\text{CDCl}_3$ ):  $\delta$  8.25 (d,  $J = 8.1$  Hz, 2H), 8.13 (d,  $J = 8.1$  Hz, 2H), 7.79 (d,  $J = 8.1$  Hz, 2H), 7.64 – 7.49 (m, 3H);  $^{13}\text{C}$  NMR (101 MHz,  $\text{CDCl}_3$ ):  $\delta$  165.1, 163.4, 133.3 (d,  $J = 33.1$  Hz), 132.1, 129.2, 127.2, 127.1, 126.1 (q,  $J = 3.7$  Hz), 124.9, 123.5, 122.2.

### 2-phenyl-5-(pyridin-3-yl)-1,3,4-oxadiazole (3l)

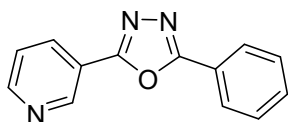

$^1\text{H}$  NMR (400 MHz,  $\text{CDCl}_3$ ):  $\delta$  9.33 (s, 1H), 8.77 (d,  $J = 4.0$  Hz, 1H), 8.42 (dd,  $J = 8.0, 1.7$  Hz, 1H), 8.12 (dt,  $J = 8.1, 1.9$  Hz, 2H), 7.61 – 7.44 (m, 4H);  $^{13}\text{C}$  NMR (101 MHz,  $\text{CDCl}_3$ ):  $\delta$  165.0, 162.4, 152.1, 147.7, 134.2, 132.1, 129.1, 127.0, 123.9, 123.4, 120.4.

### 2-phenyl-5-(pyridin-4-yl)-1,3,4-oxadiazole (3m)

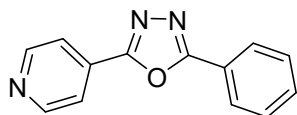

$^1\text{H}$  NMR (400 MHz,  $\text{DMSO-}d_6$ ):  $\delta$  8.83 (s, 2H), 8.08 (d,  $J = 32.3$  Hz, 4H), 7.62 (s, 3H);  $^{13}\text{C}$  NMR (101 MHz,  $\text{DMSO-}d_6$ ):  $\delta$  165.2, 162.9, 151.1, 132.9, 131.1, 129.9, 127.4, 123.4, 120.8.

### 2-phenyl-5-(pyridin-2-yl)-1,3,4-oxadiazole (3n)

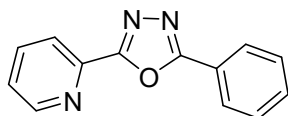

$^1\text{H}$  NMR (400 MHz,  $\text{CDCl}_3$ ):  $\delta$  8.80 (d,  $J = 4.4$  Hz, 1H), 8.30 (d,  $J = 7.9$  Hz, 1H), 8.20 (dd,  $J = 7.9, 1.5$  Hz, 2H), 7.90 (t,  $J = 8.2$  Hz, 1H), 7.59 – 7.39 (m, 4H);  $^{13}\text{C}$  NMR (101 MHz,  $\text{CDCl}_3$ ):  $\delta$  165.6, 163.7, 150.2, 143.5, 137.4, 132.0, 129.0, 127.3, 125.8, 123.5, 123.3.

### 2-(furan-2-yl)-5-phenyl-1,3,4-oxadiazole (3o)

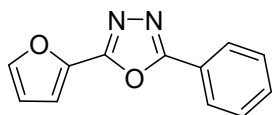

$^1\text{H}$  NMR (400 MHz,  $\text{CDCl}_3$ ):  $\delta$  8.08 (d,  $J = 8.1$  Hz, 2H), 7.64 (s, 1H), 7.56 – 7.42 (m, 3H), 7.20 (d,  $J = 3.5$  Hz, 1H), 6.60 – 6.58 (m, 1H);  $^{13}\text{C}$  NMR (101 MHz,  $\text{CDCl}_3$ ):  $\delta$  163.9, 157.4, 145.7, 139.4, 131.8, 129.1, 126.9, 123.4, 114.1, 112.2.

### 2-phenyl-5-(thiophen-2-yl)-1,3,4-oxadiazole (3p)

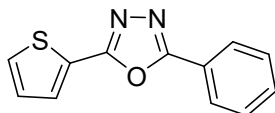

$^1\text{H}$  NMR (400 MHz,  $\text{CDCl}_3$ ):  $\delta$  8.14 – 8.03 (m, 2H), 7.81 (dt,  $J = 3.7, 1.2$  Hz, 1H), 7.57 – 7.44 (m, 4H), 7.16 (dd,  $J = 5.0, 3.8$  Hz, 1H);  $^{13}\text{C}$  NMR (101 MHz,  $\text{CDCl}_3$ ):  $\delta$  164.0, 160.8, 131.7, 130.2, 129.8, 129.1, 128.2, 126.9, 125.2, 123.6.

### 2-(1,3-benzodioxol-5-yl)-5-phenyl-1,3,4-oxadiazole (3q)

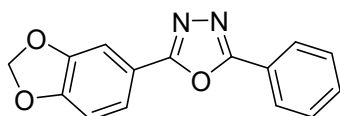

$^1\text{H}$  NMR (400 MHz,  $\text{CDCl}_3$ ):  $\delta$  8.10 (d,  $J = 8.0$  Hz, 2H), 7.67 (d,  $J = 8.1$  Hz, 1H), 7.57 (s, 1H), 7.55 – 7.44

(m, 3H), 6.93 (d,  $J = 8.1$  Hz, 1H), 6.06 (s, 2H);  $^{13}\text{C}$  NMR (101 MHz,  $\text{CDCl}_3$ ):  $\delta$  164.3, 164.2, 150.6, 148.3, 131.6, 129.0, 126.8, 123.9, 122.0, 117.7, 108.9, 107.0, 101.8.

**2-phenyl-5-(o-tolyl)-1,3,4-oxadiazole (3r)**

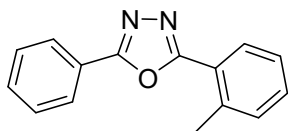

$^1\text{H}$  NMR (400 MHz,  $\text{CDCl}_3$ ):  $\delta$  8.15 – 8.08 (m, 2H), 8.02 (d,  $J = 8.1$  Hz, 1H), 7.56 – 7.47 (m, 3H), 7.45 – 7.37 (m, 1H), 7.37 – 7.30 (m, 2H), 2.75 (s, 3H);  $^{13}\text{C}$  NMR (101 MHz,  $\text{CDCl}_3$ ):  $\delta$  164.8, 164.1, 138.4, 131.8, 131.7, 131.2, 129.1, 128.9, 126.9, 126.2, 123.9, 122.9, 22.2.

**2-(4-chlorophenyl)-5-phenyl-1,3,4-oxadiazole (3s)**

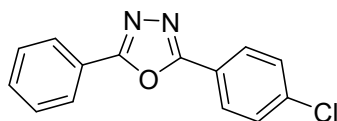

$^1\text{H}$  NMR (400 MHz,  $\text{CDCl}_3$ ):  $\delta$  8.09 (d,  $J = 8.0$  Hz, 2H), 8.04 (d,  $J = 7.4$  Hz, 2H), 7.57 – 7.43 (m, 5H);  $^{13}\text{C}$  NMR (101 MHz,  $\text{CDCl}_3$ ):  $\delta$  164.7, 163.7, 137.9, 131.9, 129.4, 129.1, 128.1, 126.9, 123.6, 122.3.

**2-(2-chlorophenyl)-5-phenyl-1,3,4-oxadiazole (3t)**

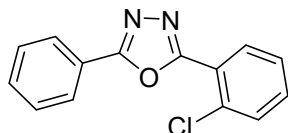

$^1\text{H}$  NMR (400 MHz,  $\text{CDCl}_3$ ):  $\delta$  8.13 (dd,  $J = 7.6, 2.0$  Hz, 2H), 8.09 (dd,  $J = 7.6, 1.9$  Hz, 1H), 7.58 – 7.38 (m, 6H);  $^{13}\text{C}$  NMR (101 MHz,  $\text{CDCl}_3$ ):  $\delta$  165.1, 163.0, 133.0, 132.4, 131.9, 131.3, 131.2, 129.1, 127.1, 127.0, 123.7, 123.2.

**2-(4-nitrophenyl)-5-phenyl-1,3,4-oxadiazole (3u)**

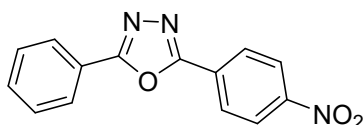

$^1\text{H}$  NMR (400 MHz,  $\text{CDCl}_3$ ):  $\delta$  8.40 (d,  $J = 9.0$  Hz, 2H), 8.32 (d,  $J = 9.0$  Hz, 2H), 8.15 (dd,  $J = 8.1, 1.5$  Hz, 2H), 7.64 – 7.51 (m, 3H);  $^{13}\text{C}$  NMR (101 MHz,  $\text{CDCl}_3$ ):  $\delta$  165.5, 162.8, 149.5, 132.3, 129.4, 129.2, 127.8, 127.1, 124.4, 123.3.

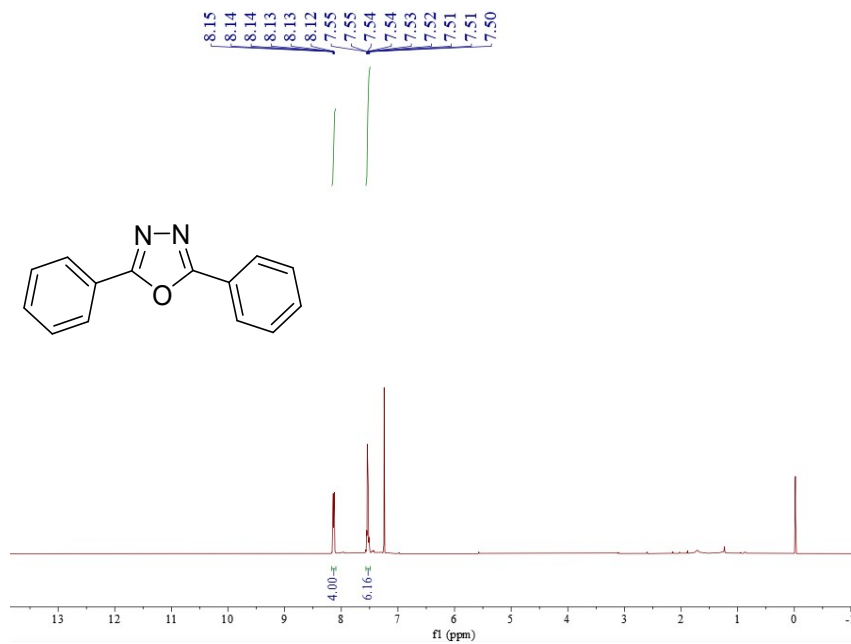

Fig. S6 <sup>1</sup>H NMR of 3a

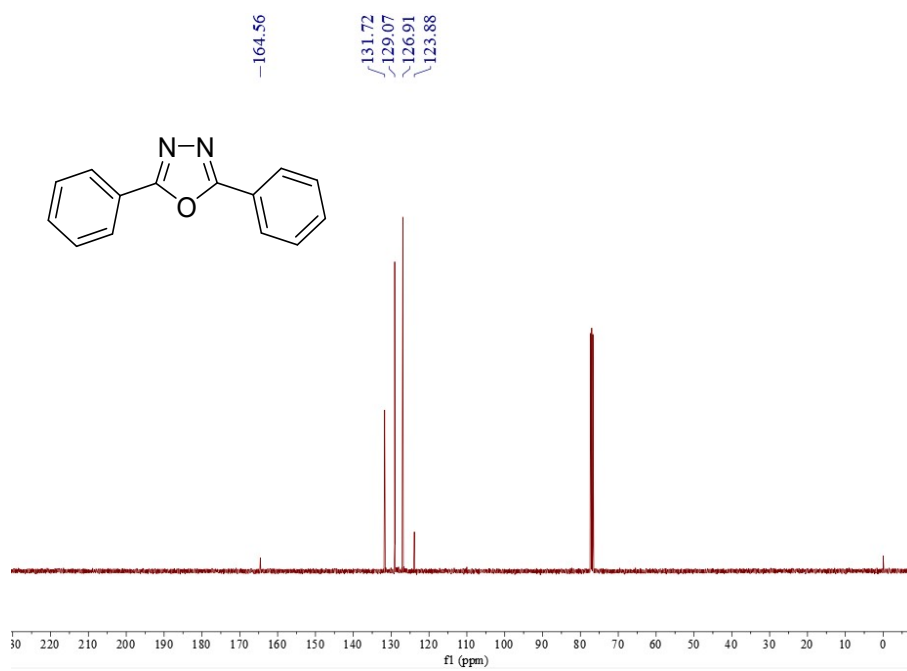

Fig. S7 <sup>13</sup>C NMR of 3a



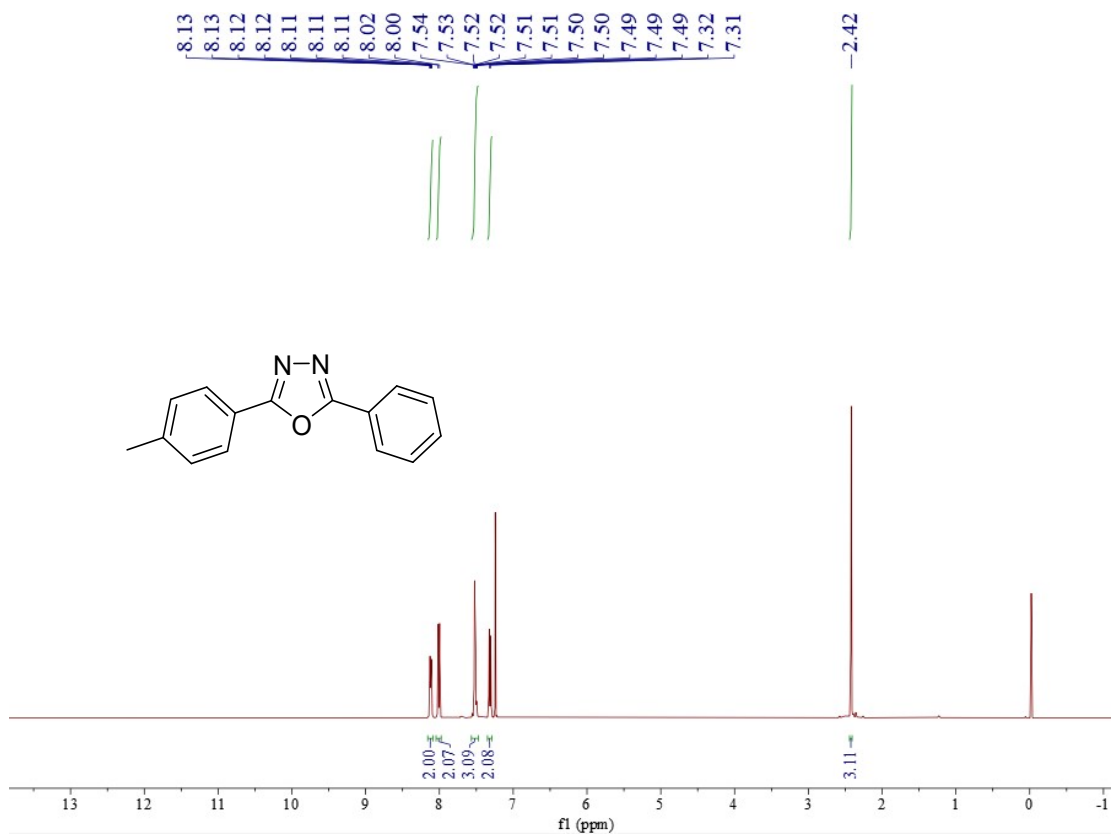

Fig. S8 <sup>1</sup>H NMR of 3b

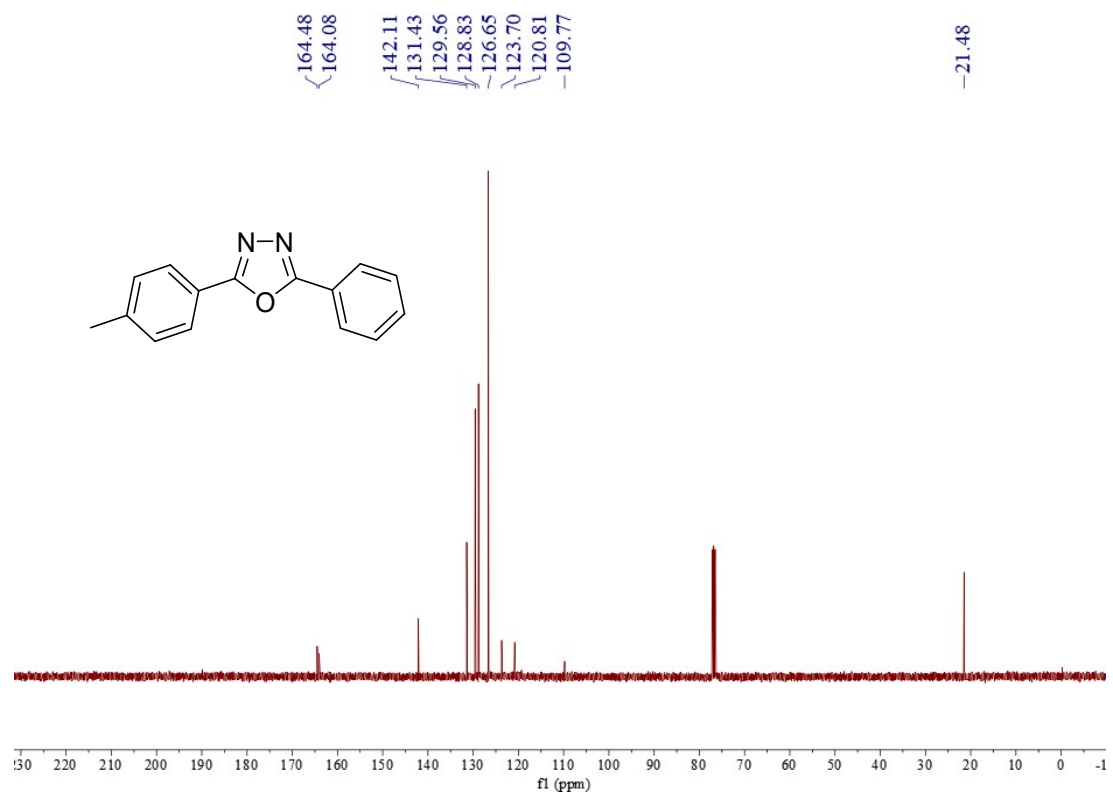

Fig. S9 <sup>13</sup>C NMR of 3b

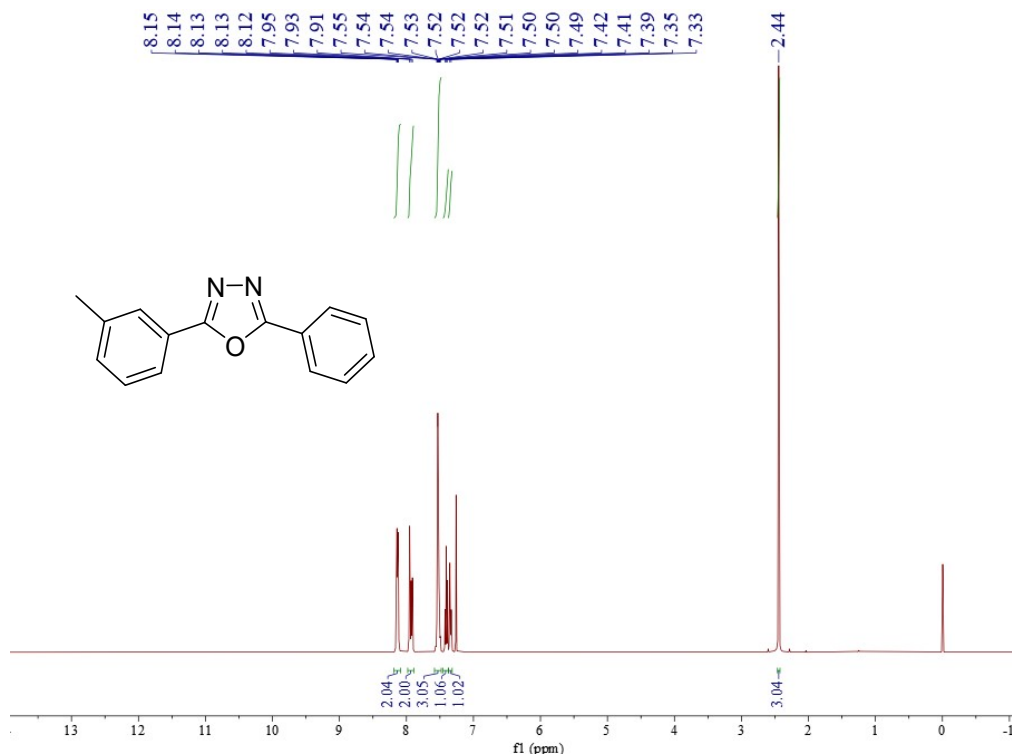

Fig. S10  $^1\text{H}$  NMR of 3c

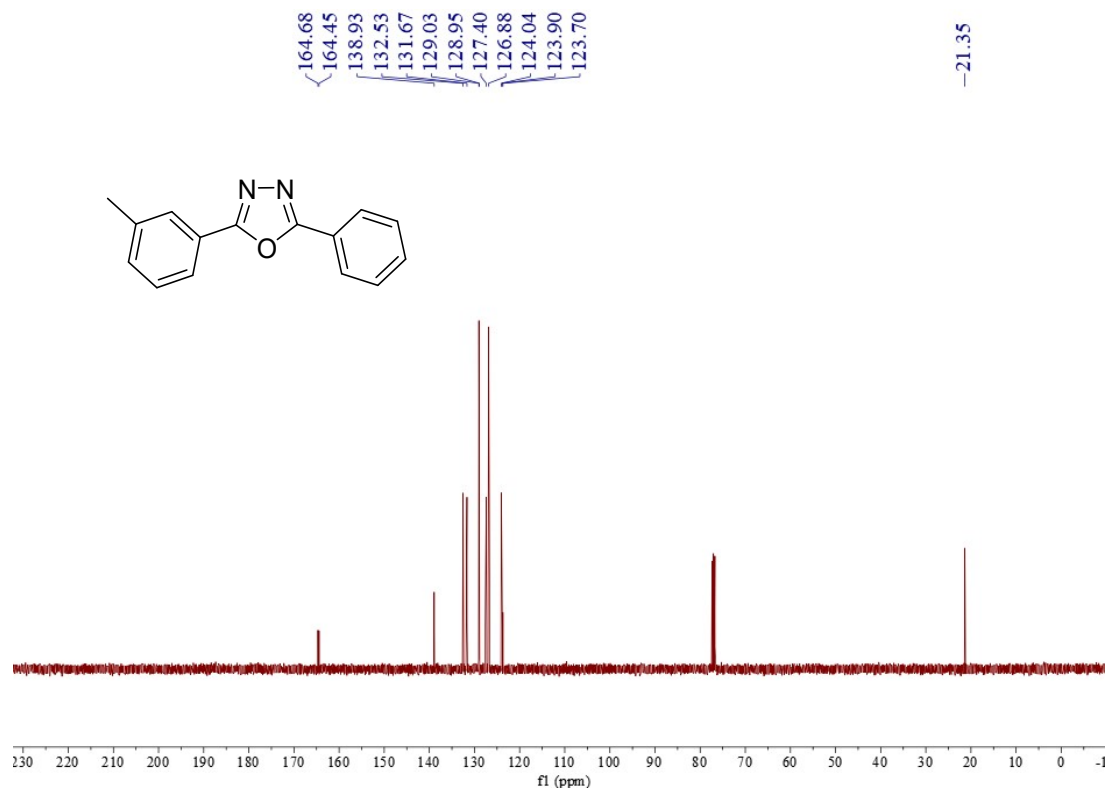

Fig. S11  $^{13}\text{C}$  NMR of 3c

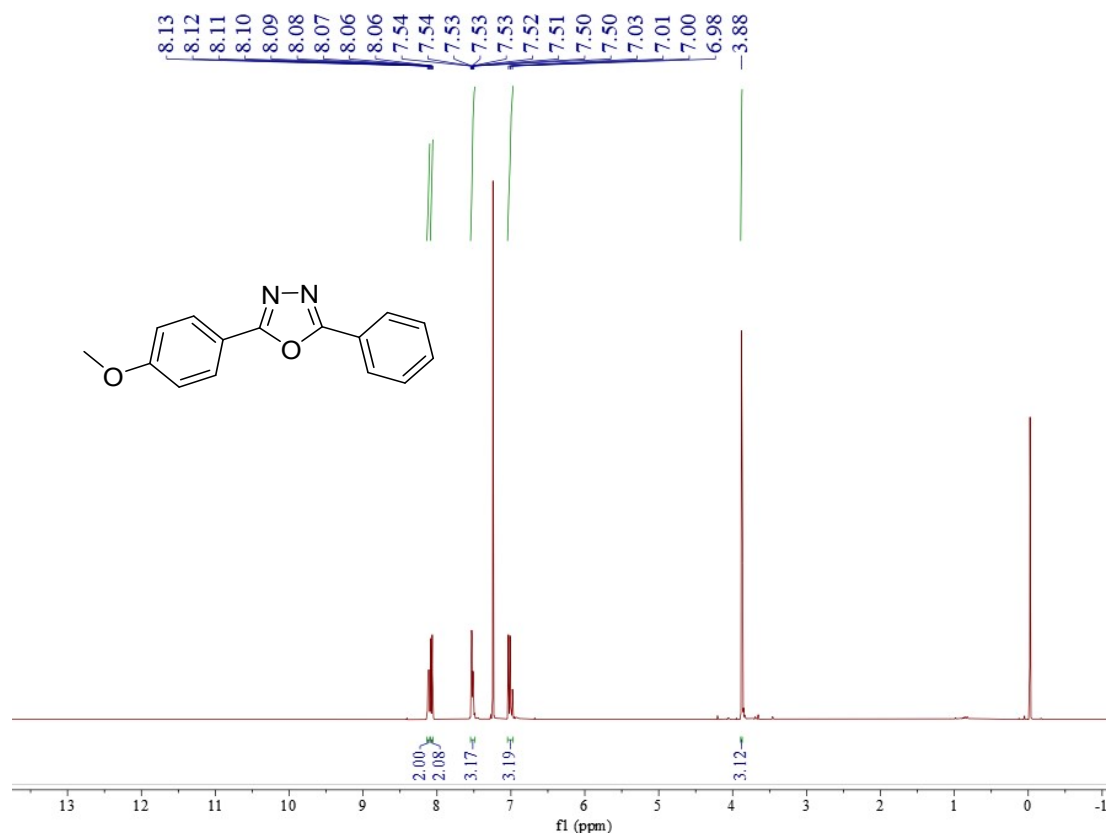

Fig. S12 <sup>1</sup>H NMR of 3d

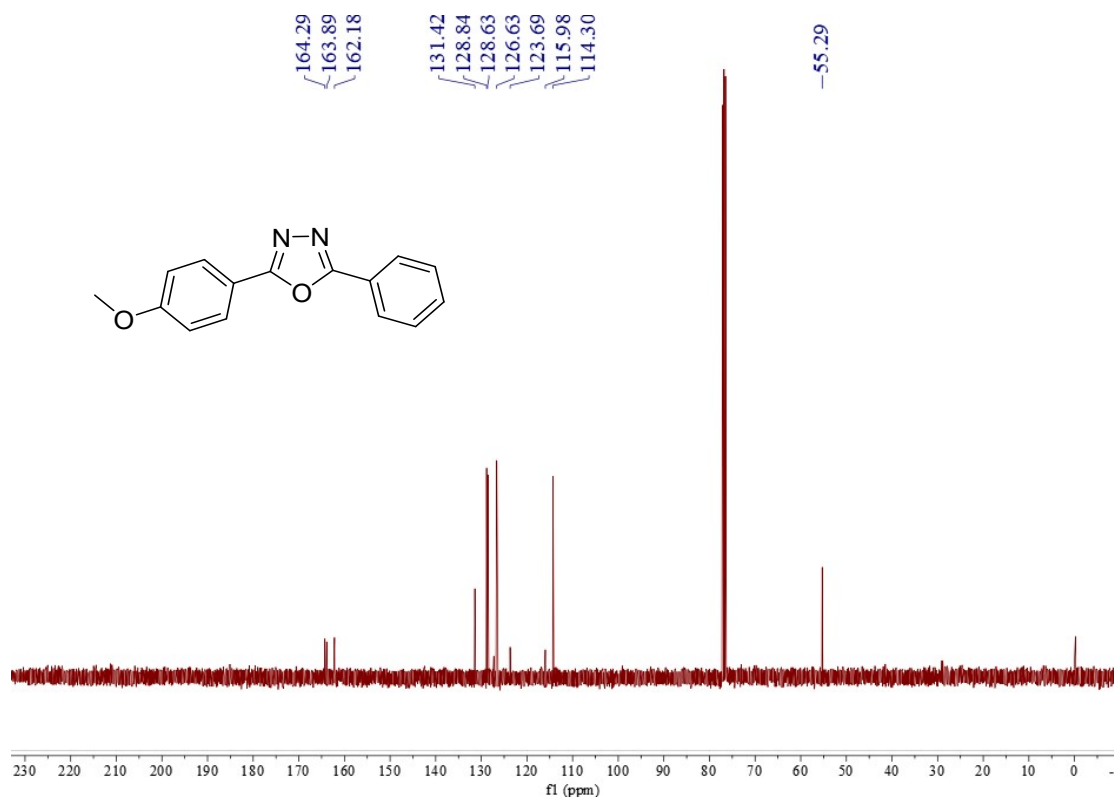

Fig. S13 <sup>13</sup>C NMR of 3d

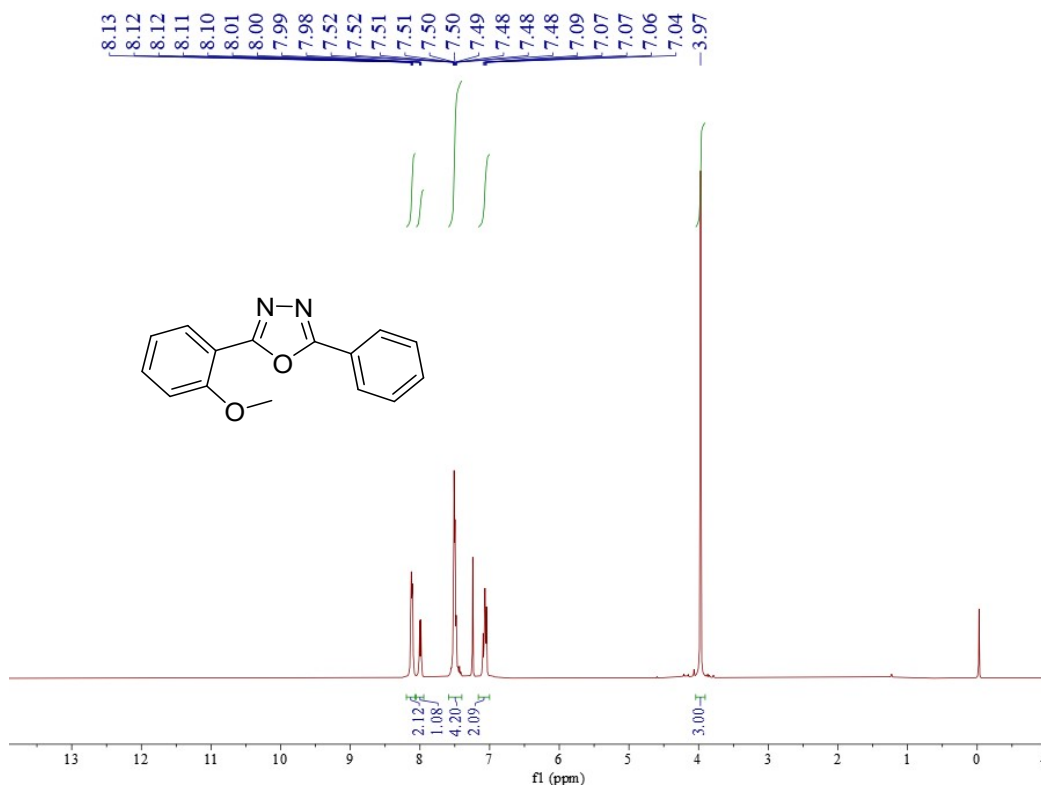

Fig. S14  $^1\text{H NMR}$  of 3e

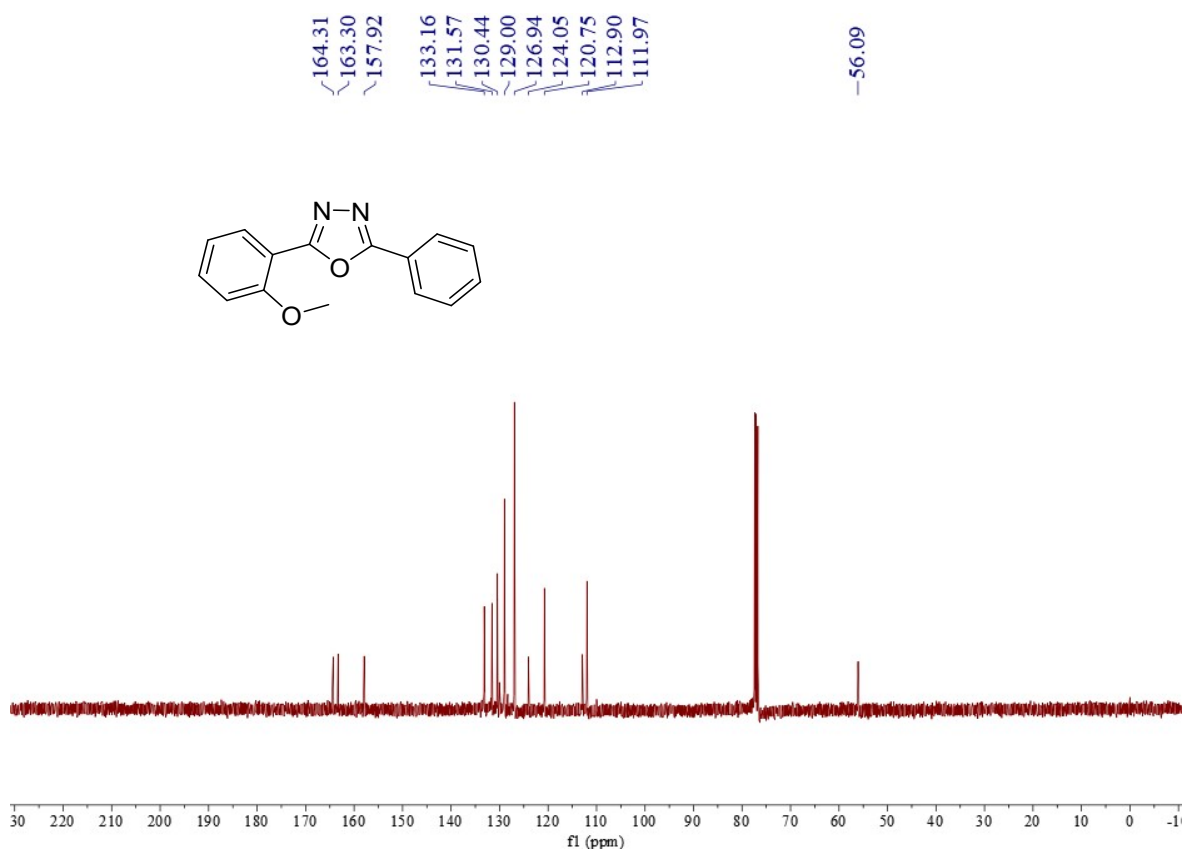

Fig. S15  $^{13}\text{C NMR}$  of 3e

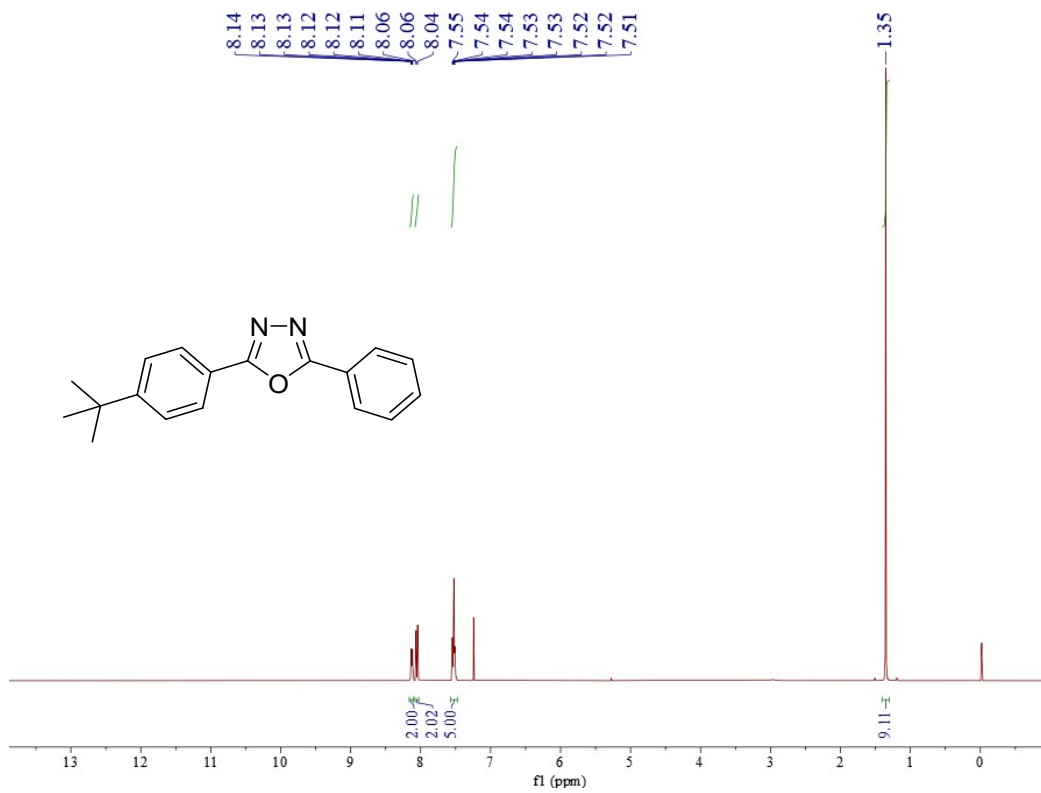

Fig. S16 <sup>1</sup>H NMR of 3f

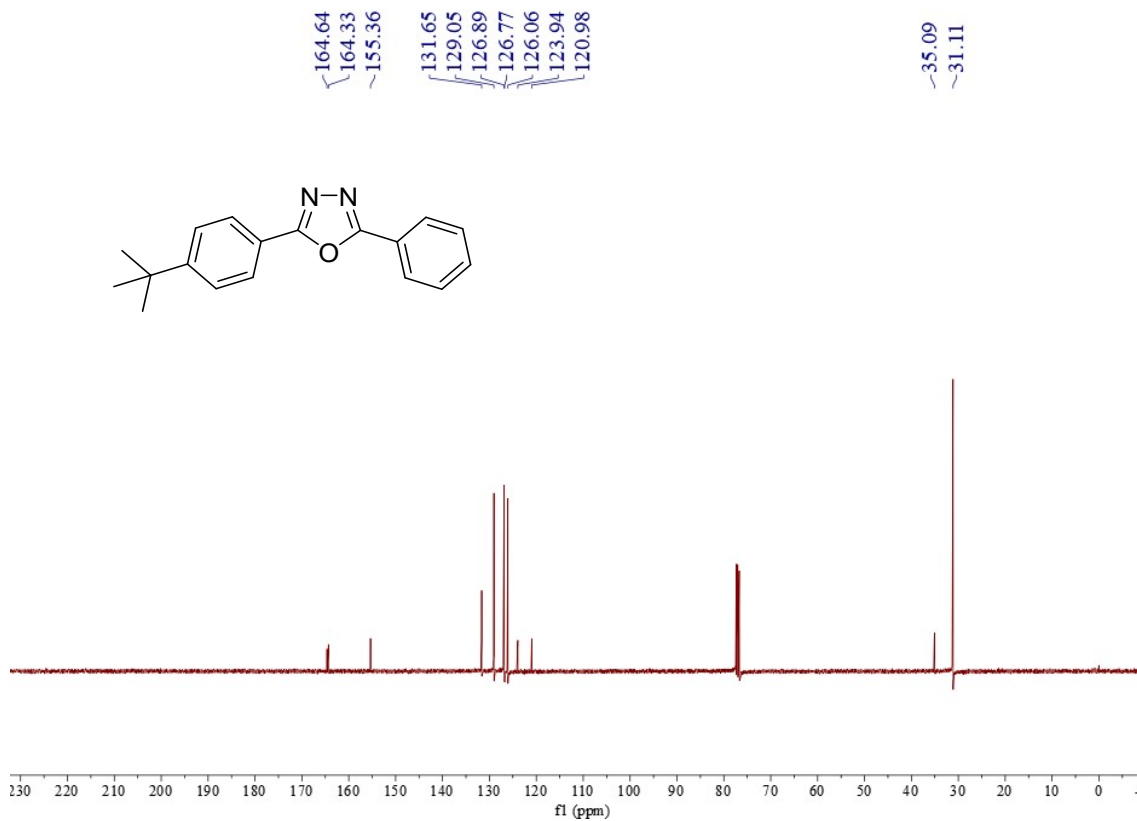

Fig. S17 <sup>13</sup>C NMR of 3f

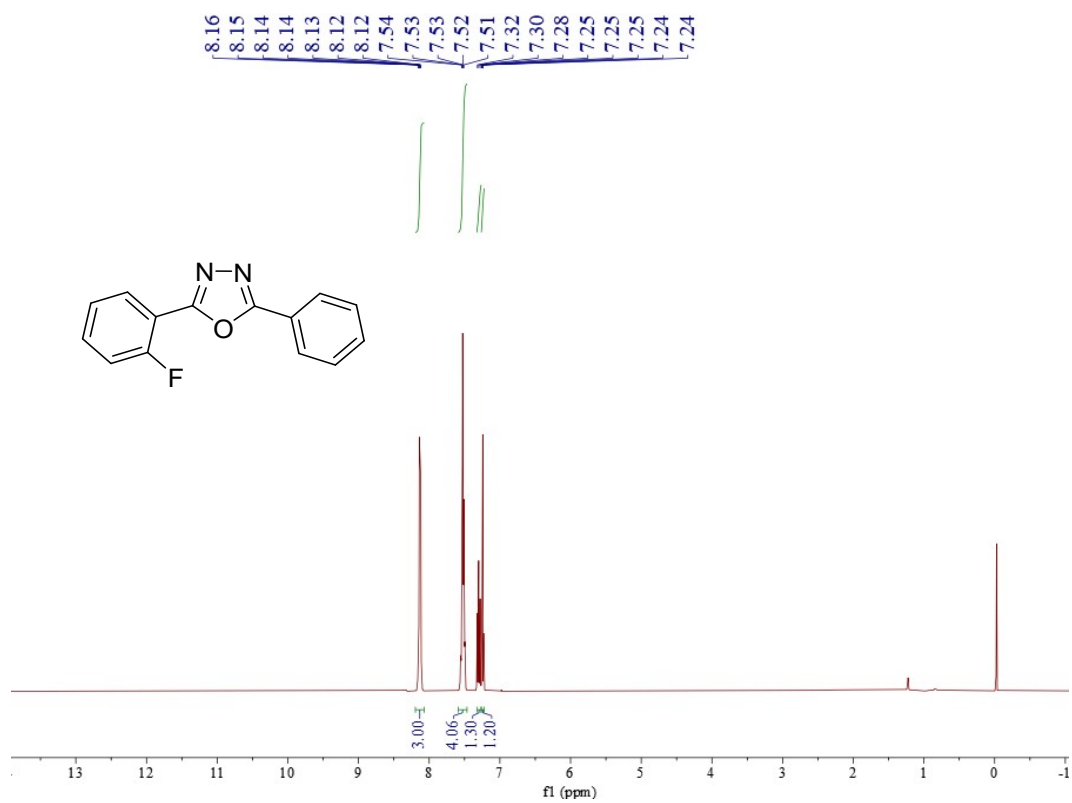

Fig. S18  $^1\text{H}$  NMR of **3g**

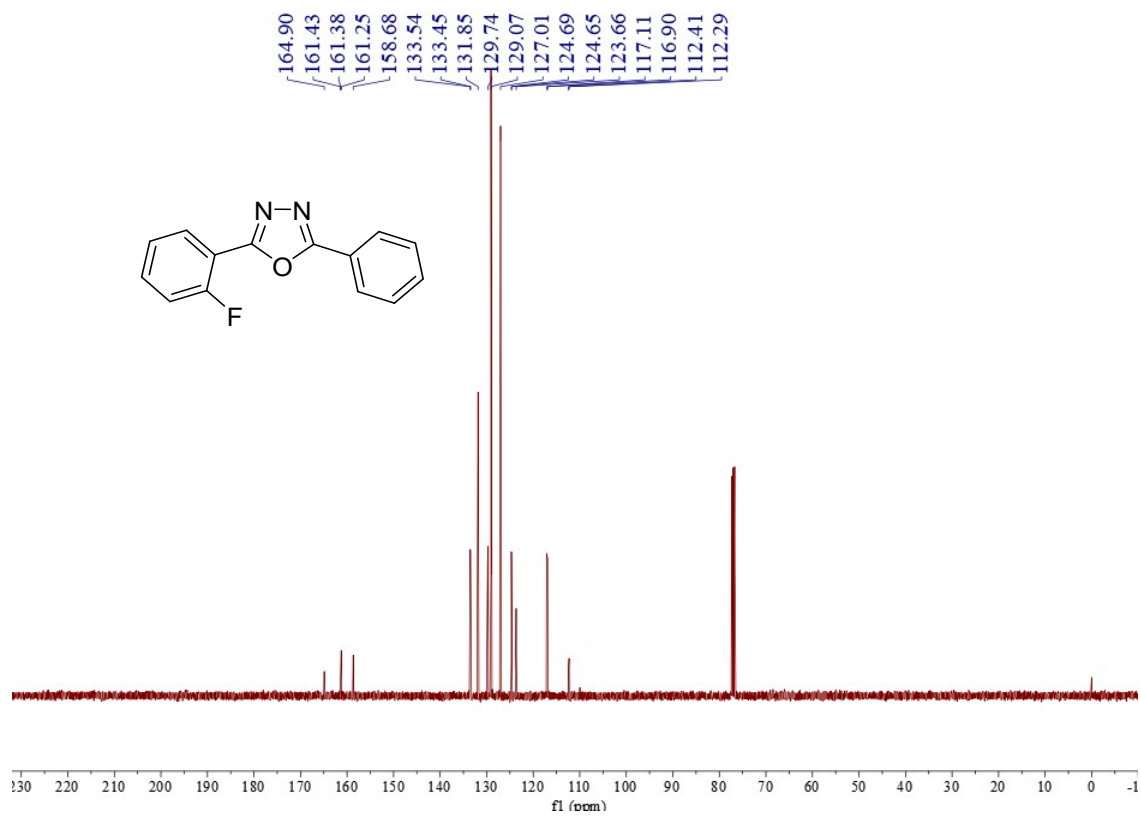

Fig. S19  $^{13}\text{C}$  NMR of **3g**

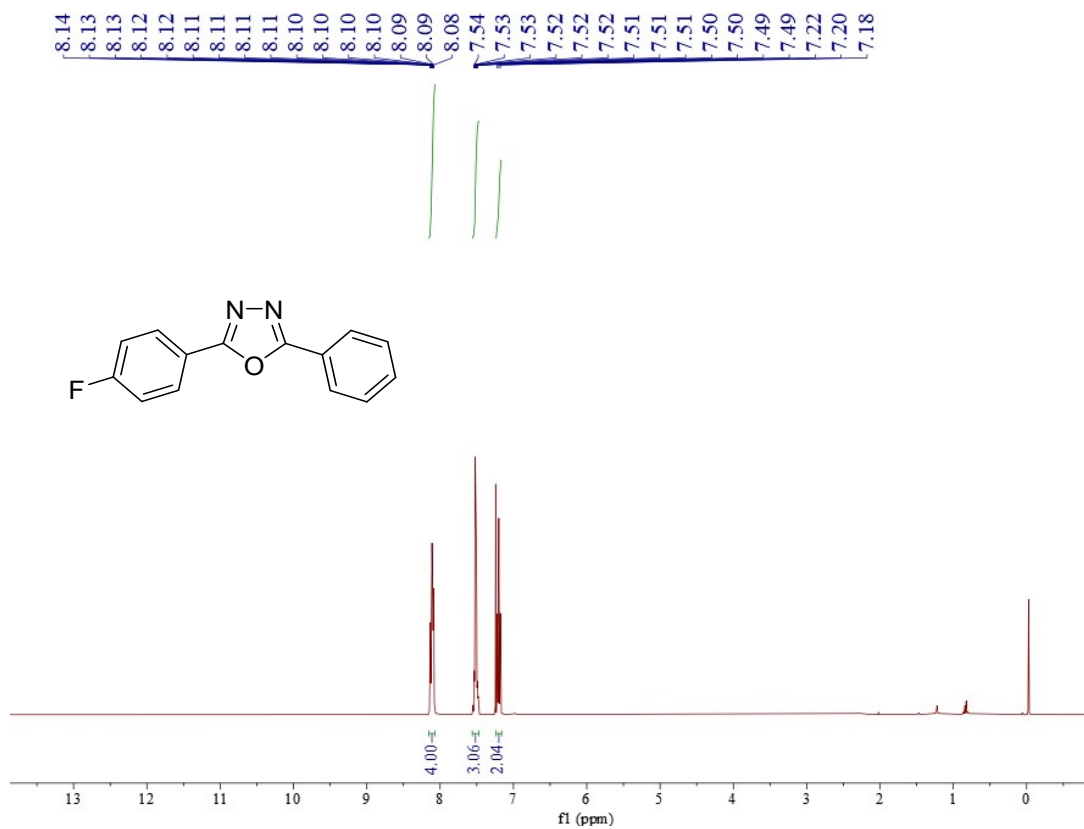

Fig. S20 <sup>1</sup>H NMR of 3h

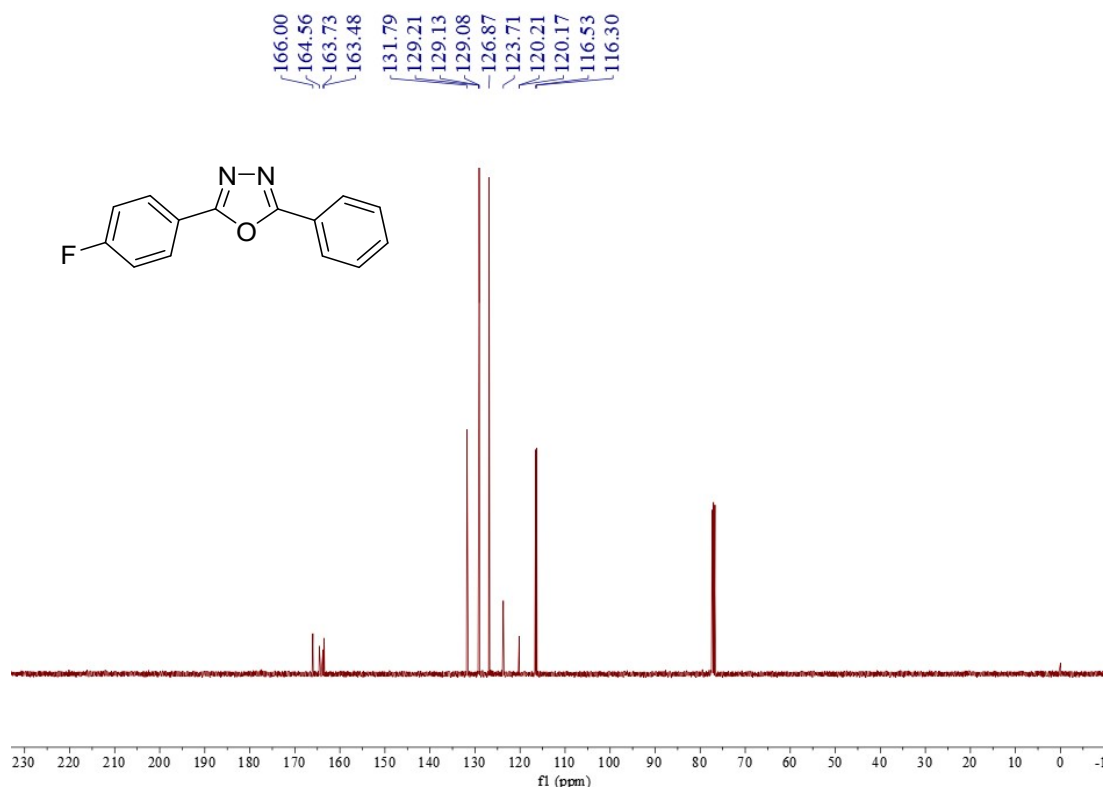

Fig. S21 <sup>13</sup>C NMR of 3h

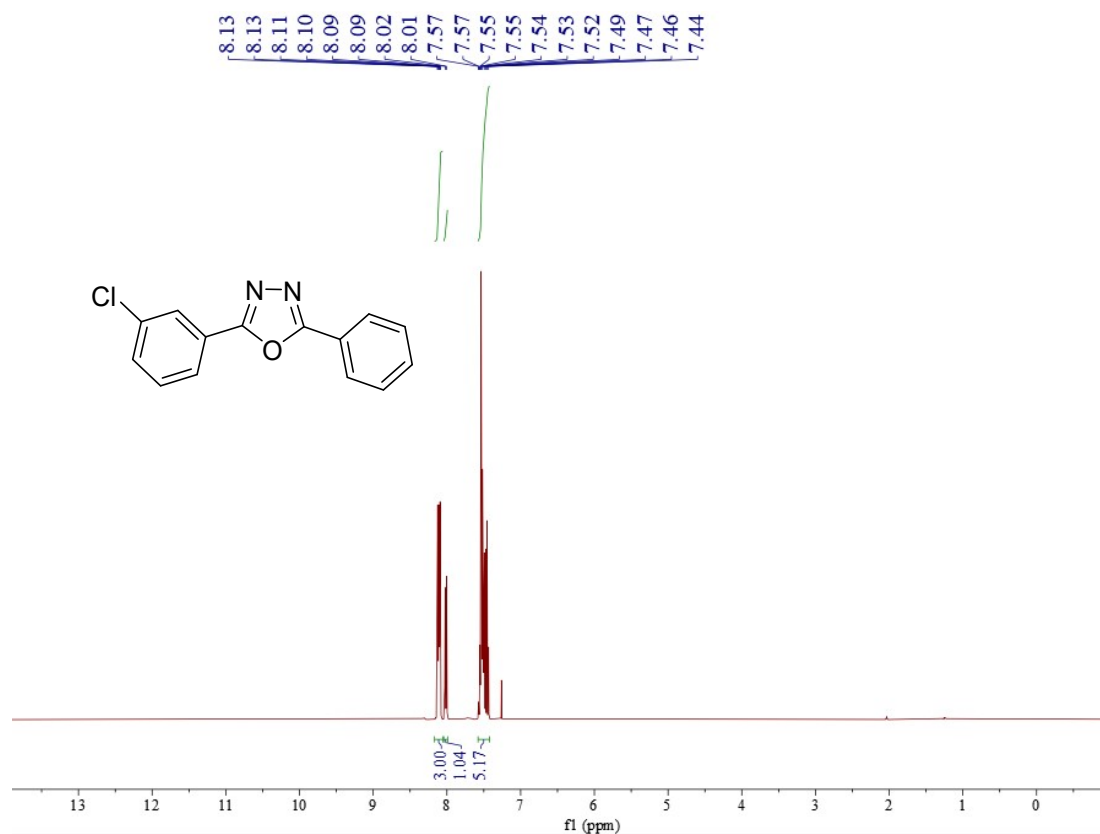

Fig. S22 <sup>1</sup>H NMR of 3i

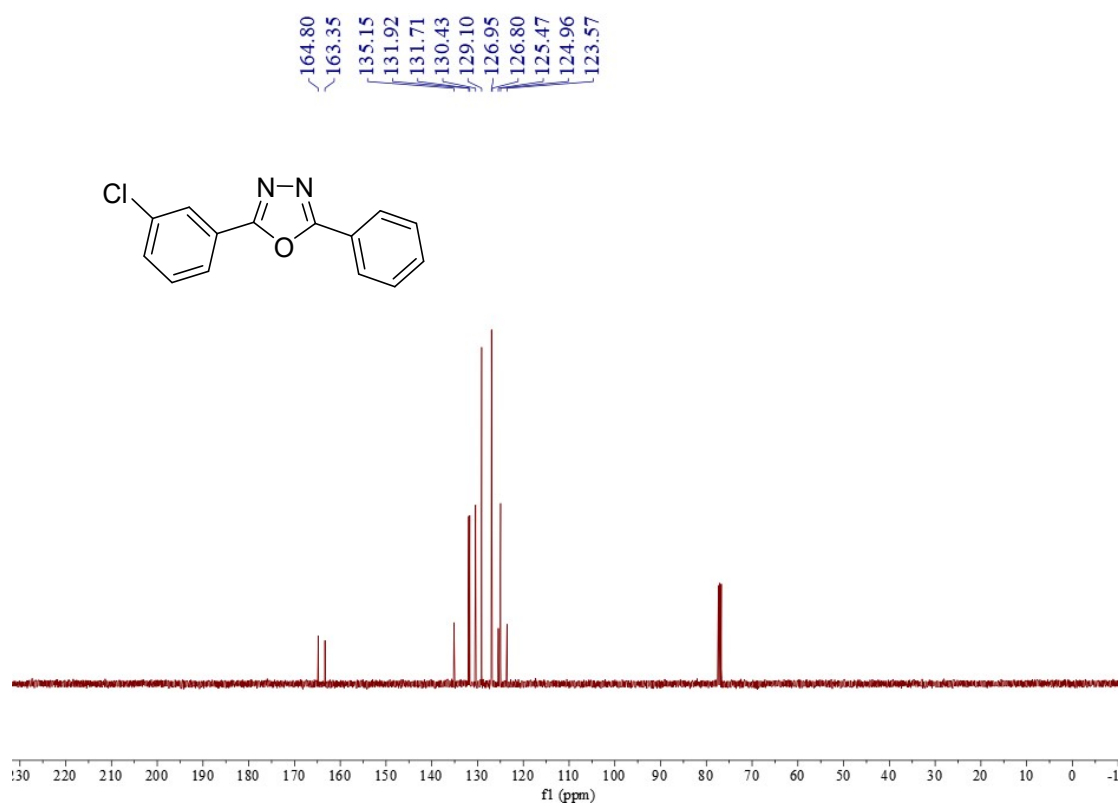

Fig. S23 <sup>13</sup>C NMR of 3i



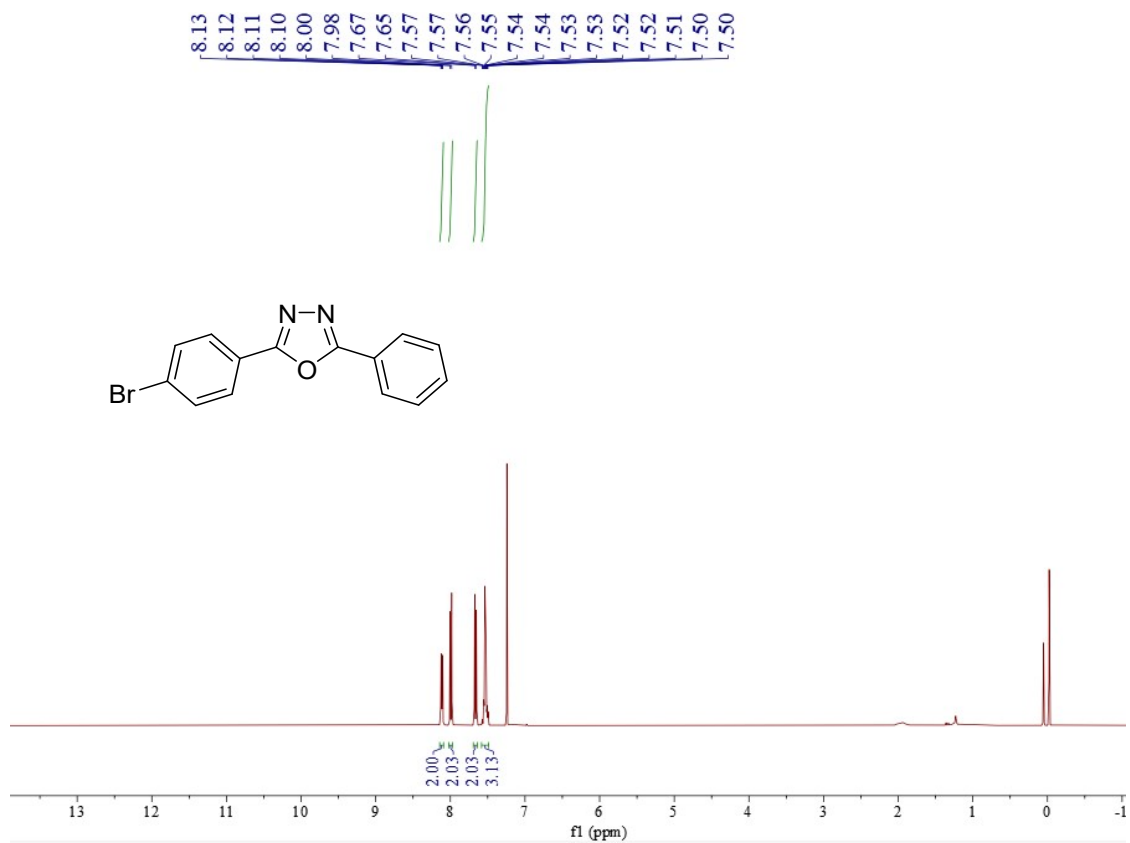

Fig. S24 <sup>1</sup>H NMR of 3j

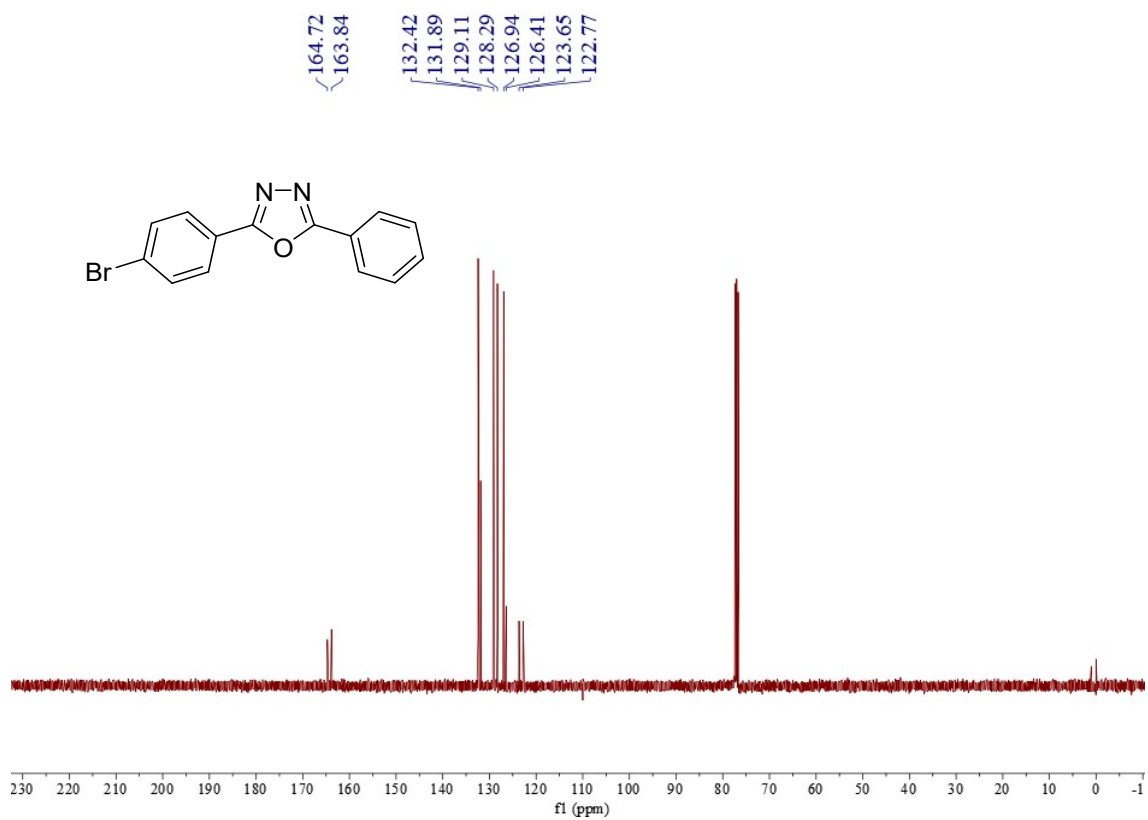

Fig. S25 <sup>13</sup>C NMR of 3j

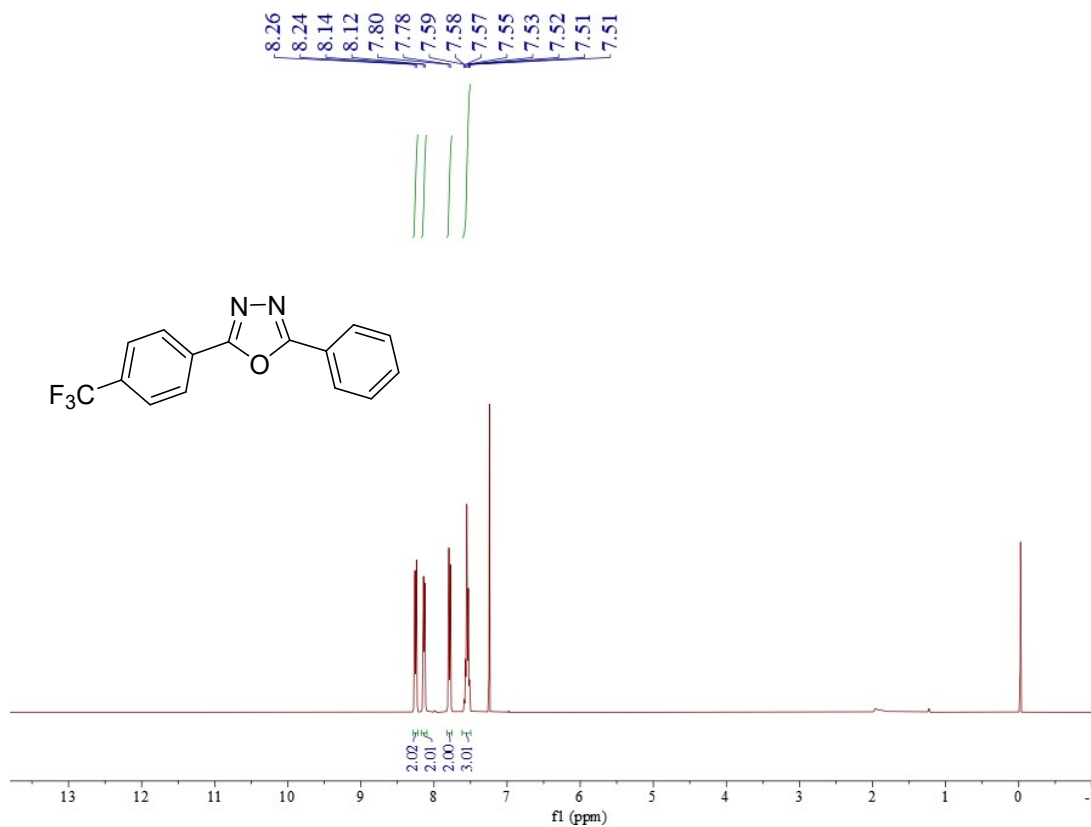

Fig. S26 <sup>1</sup>H NMR of 3k

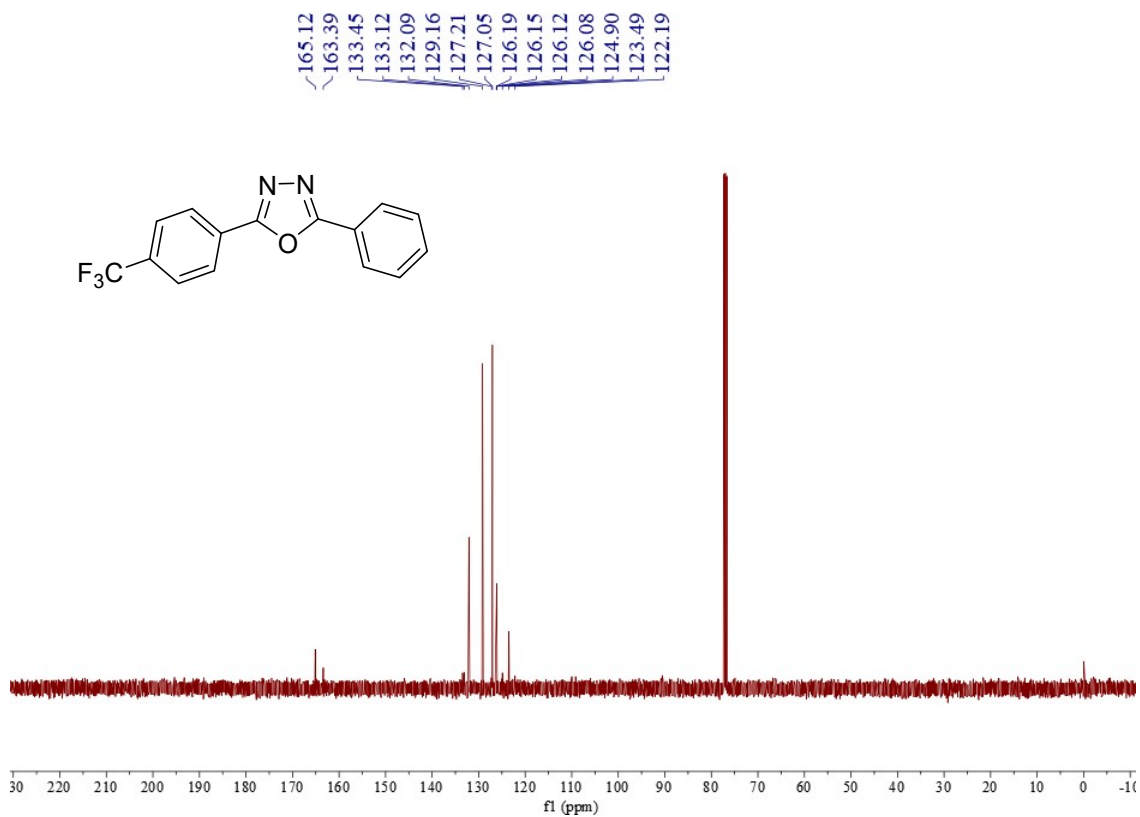

Fig. S27 <sup>13</sup>C NMR of 3k

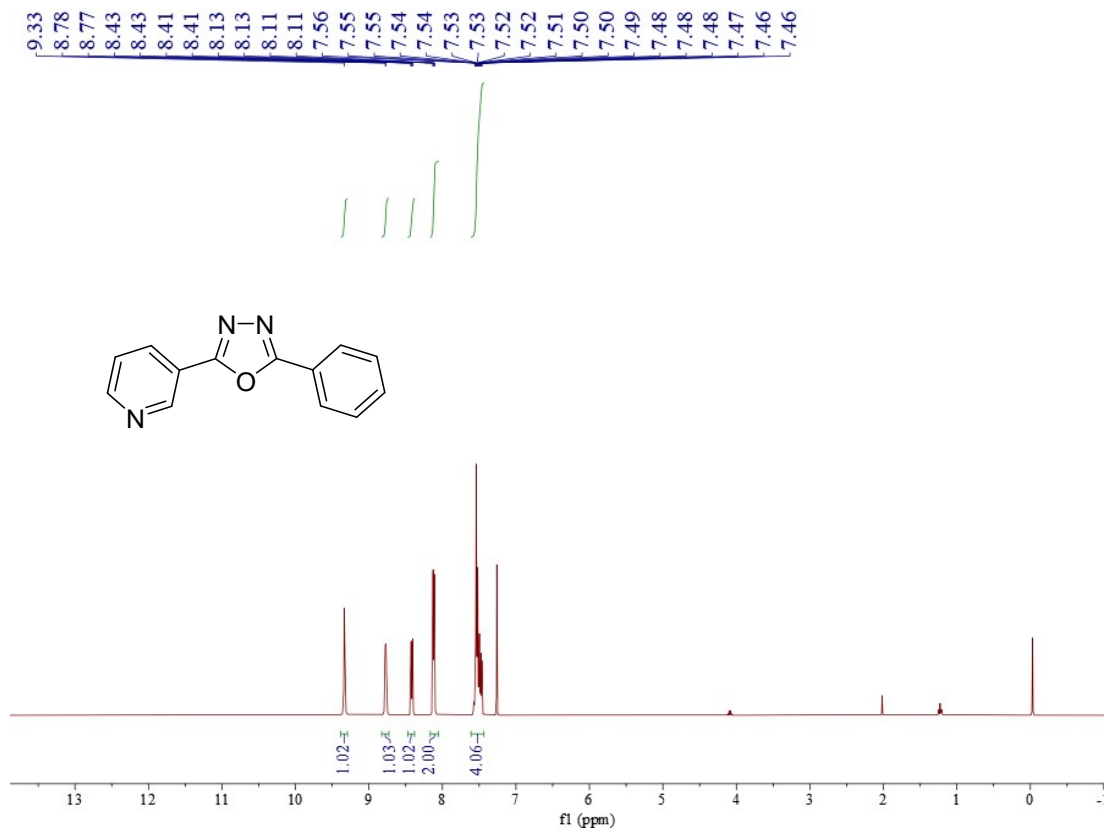

Fig. S28 <sup>1</sup>H NMR of 31

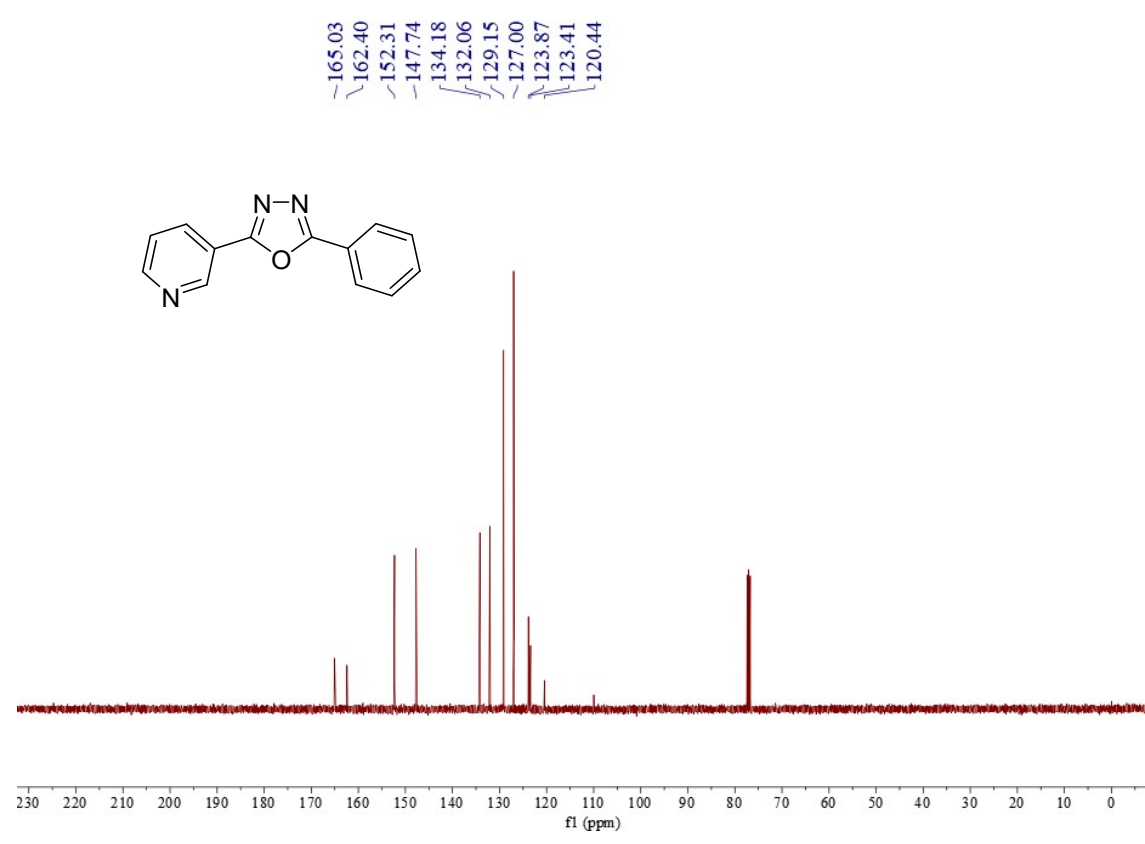

Fig. S29 <sup>13</sup>C NMR of 31

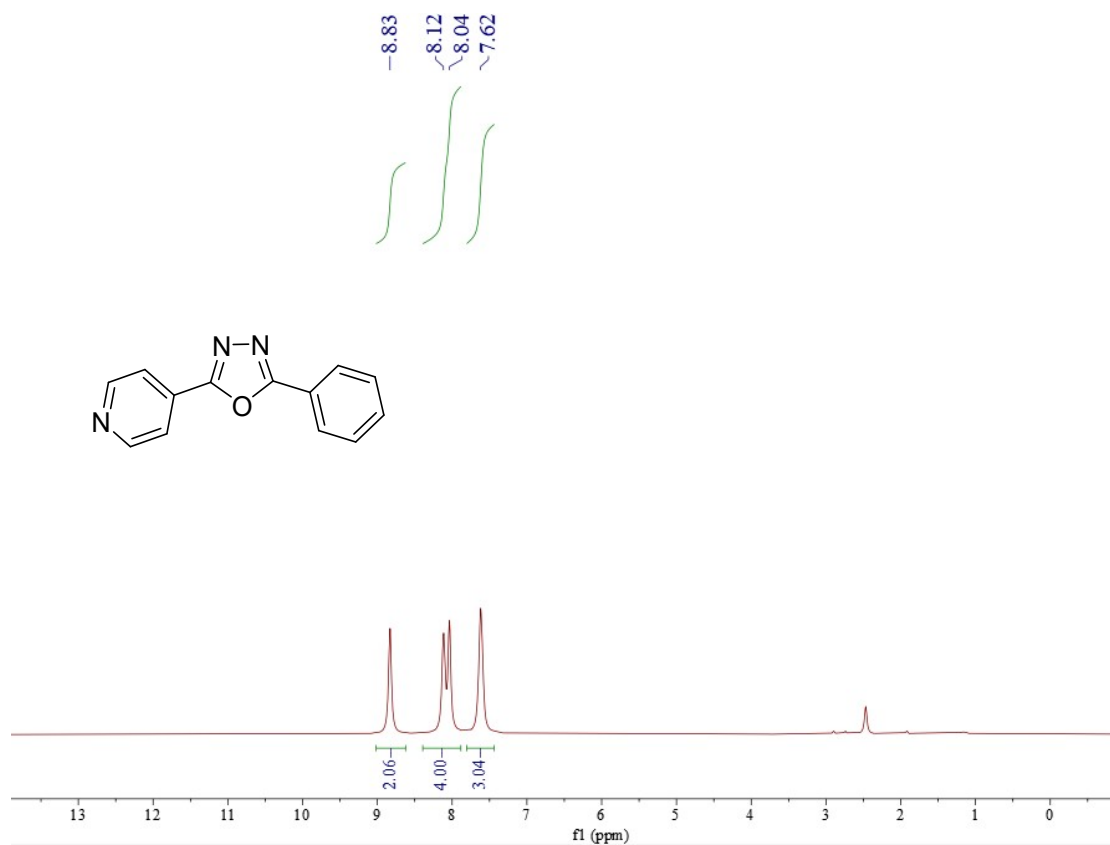

Fig. S30  $^1\text{H}$  NMR of 3m

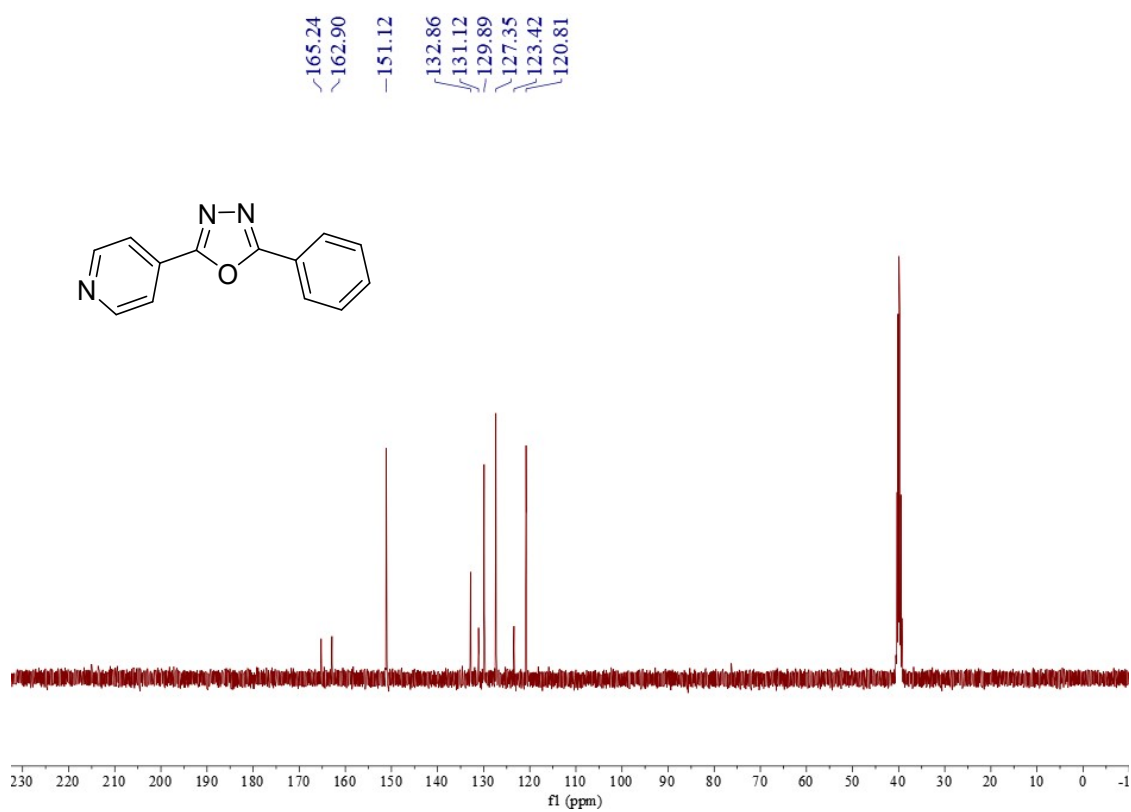

Fig. S31  $^{13}\text{C}$  NMR of 3m

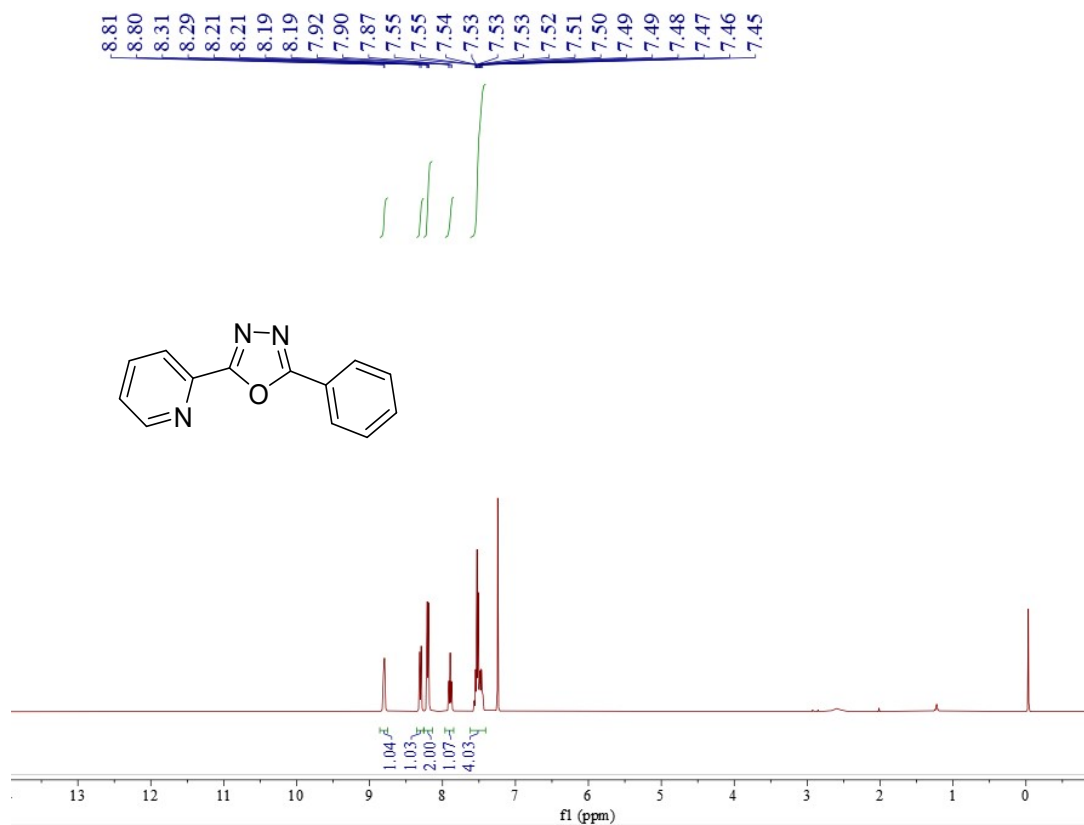

Fig. S32 <sup>1</sup>H NMR of 3n

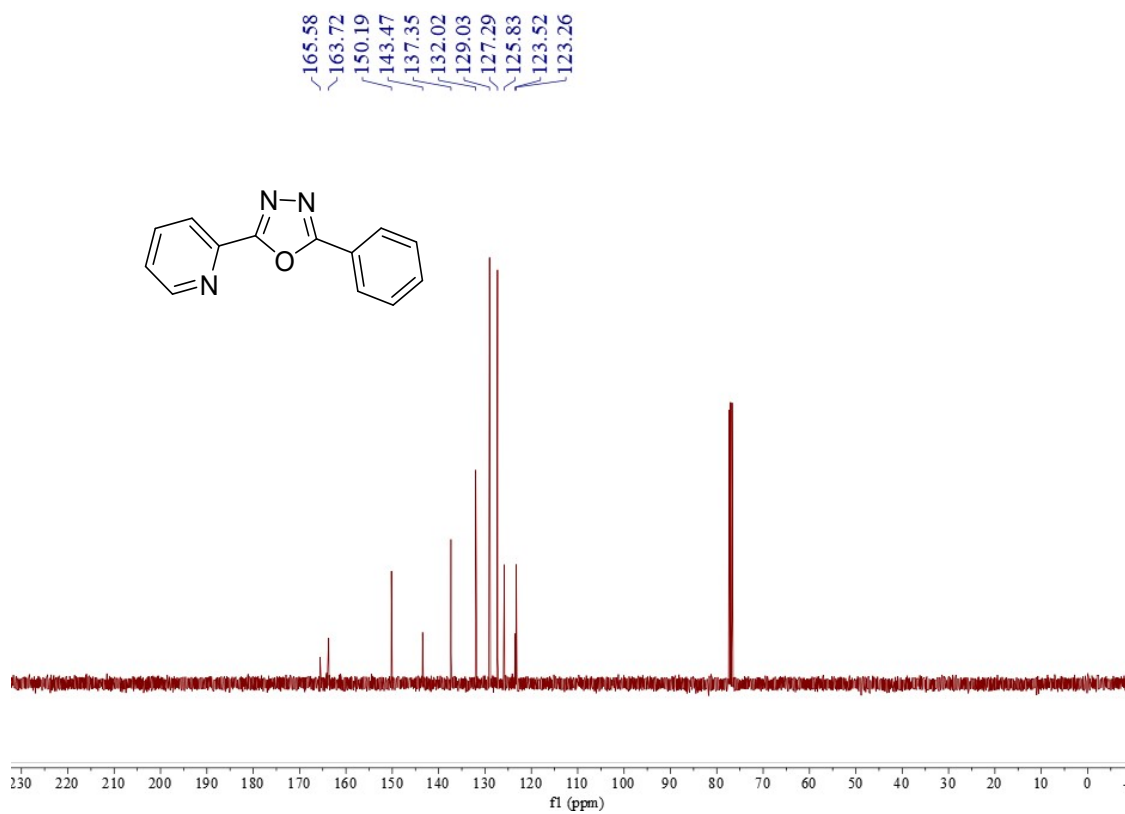

Fig. S33 <sup>13</sup>C NMR of 3n

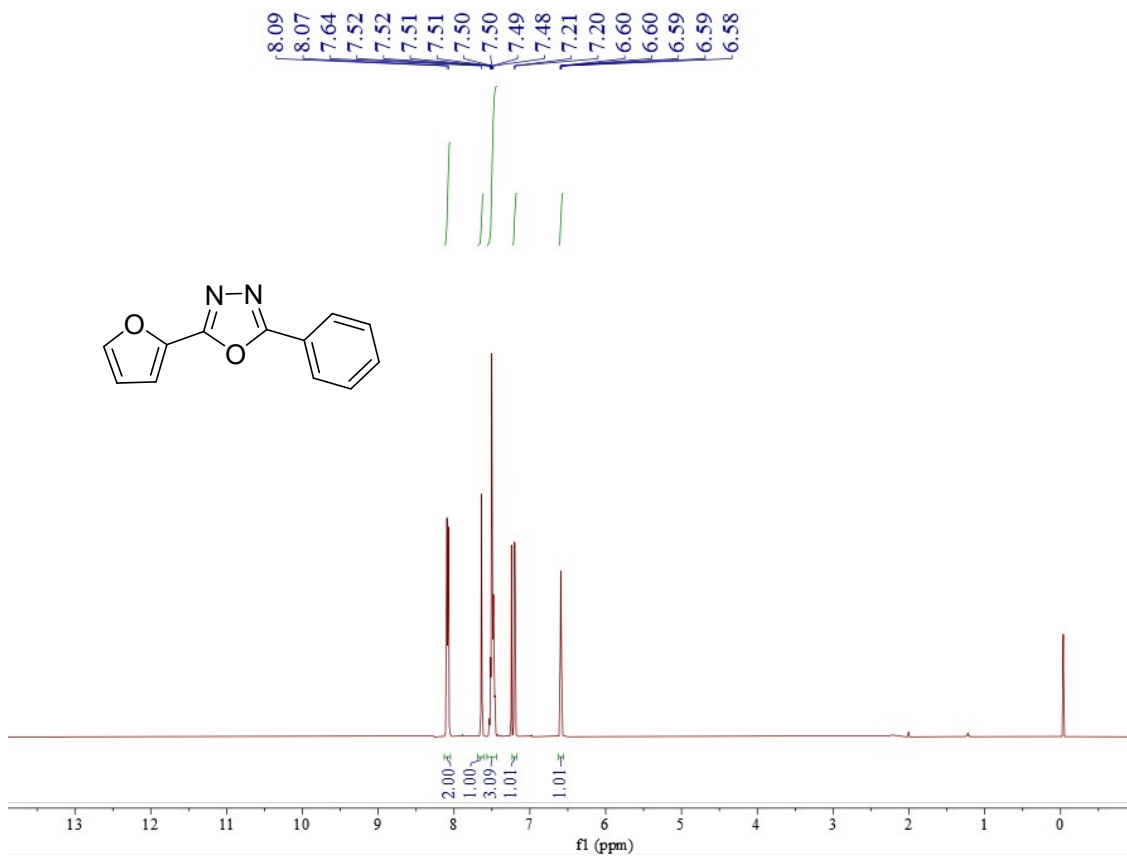

Fig. S34 <sup>1</sup>H NMR of 3o

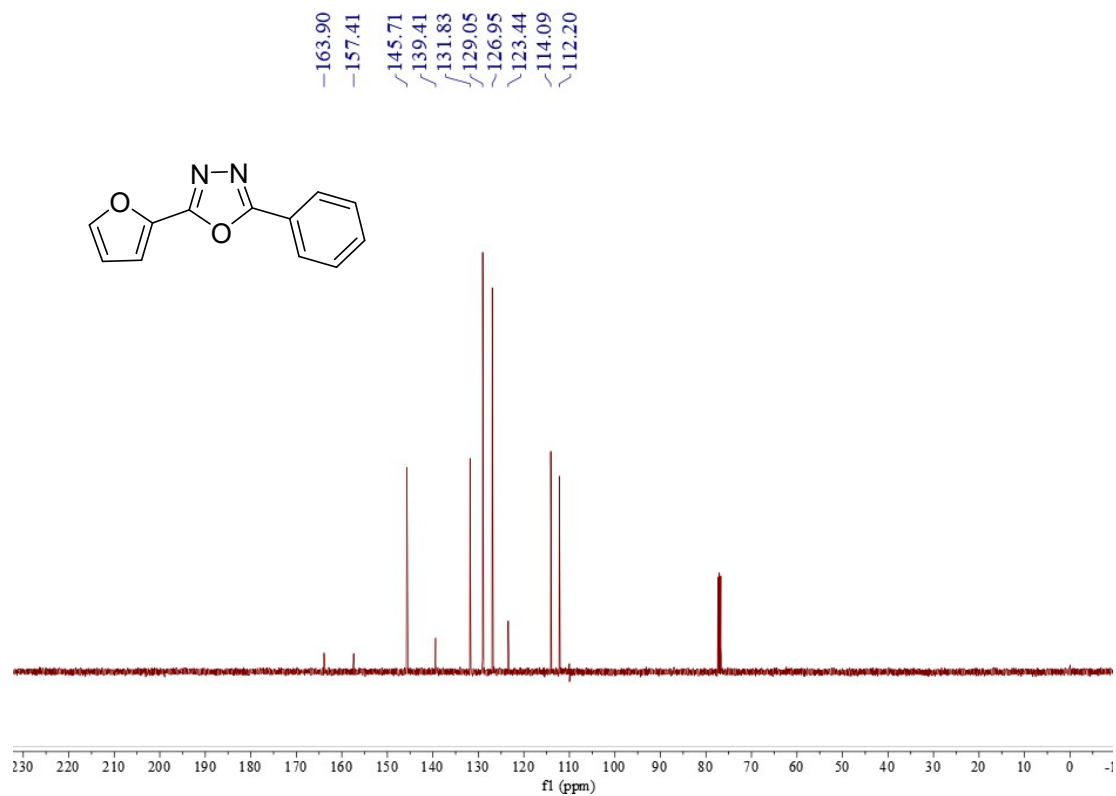

Fig. S35 <sup>13</sup>C NMR of 3o

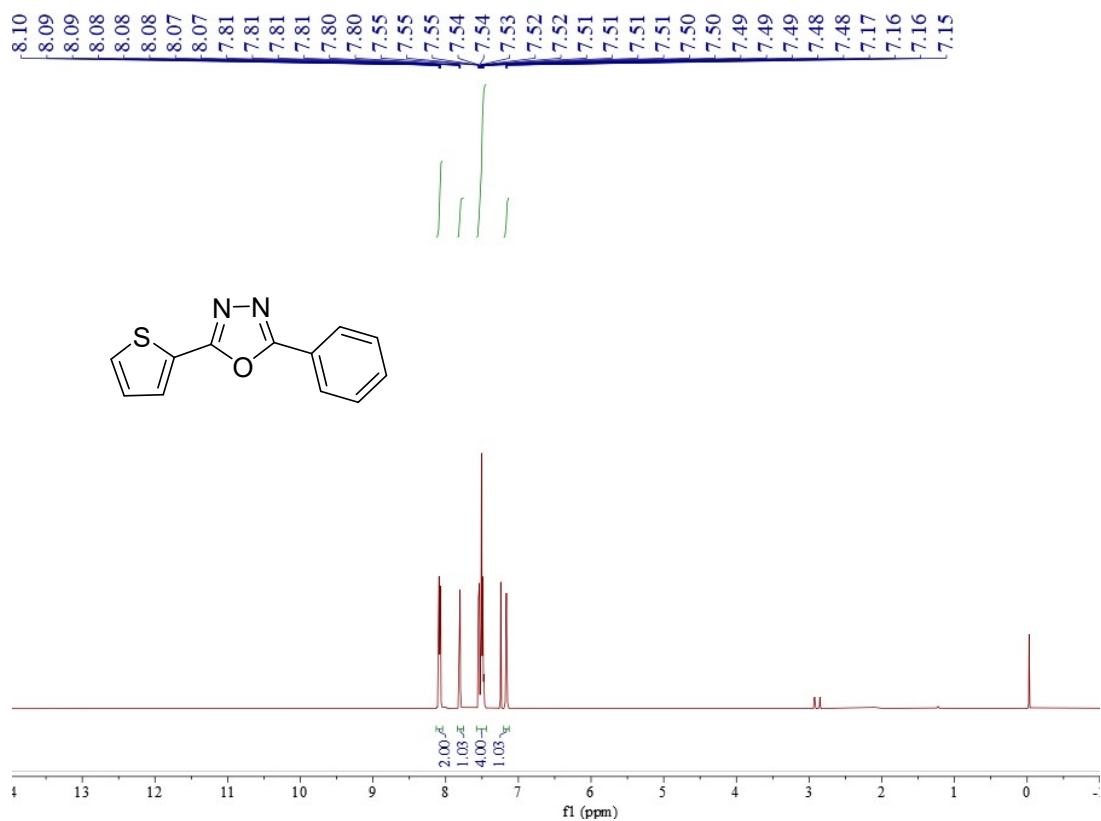

Fig. S36 <sup>1</sup>H NMR of 3p

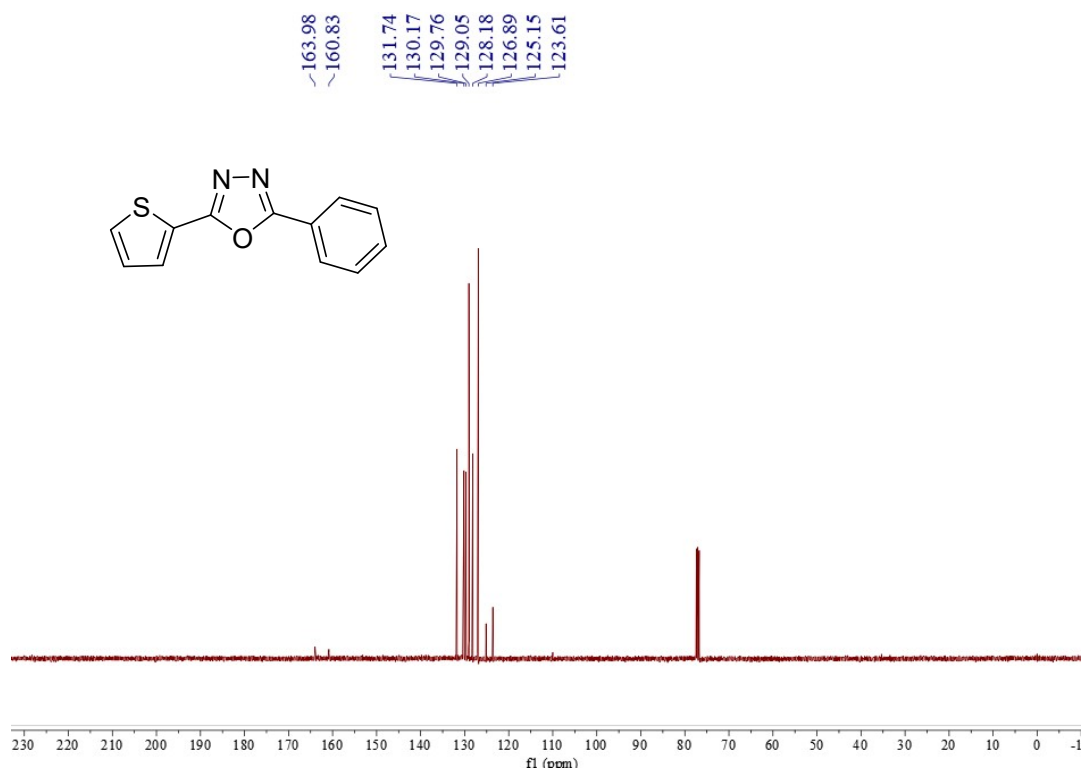

Fig. S37 <sup>13</sup>C NMR of 3p

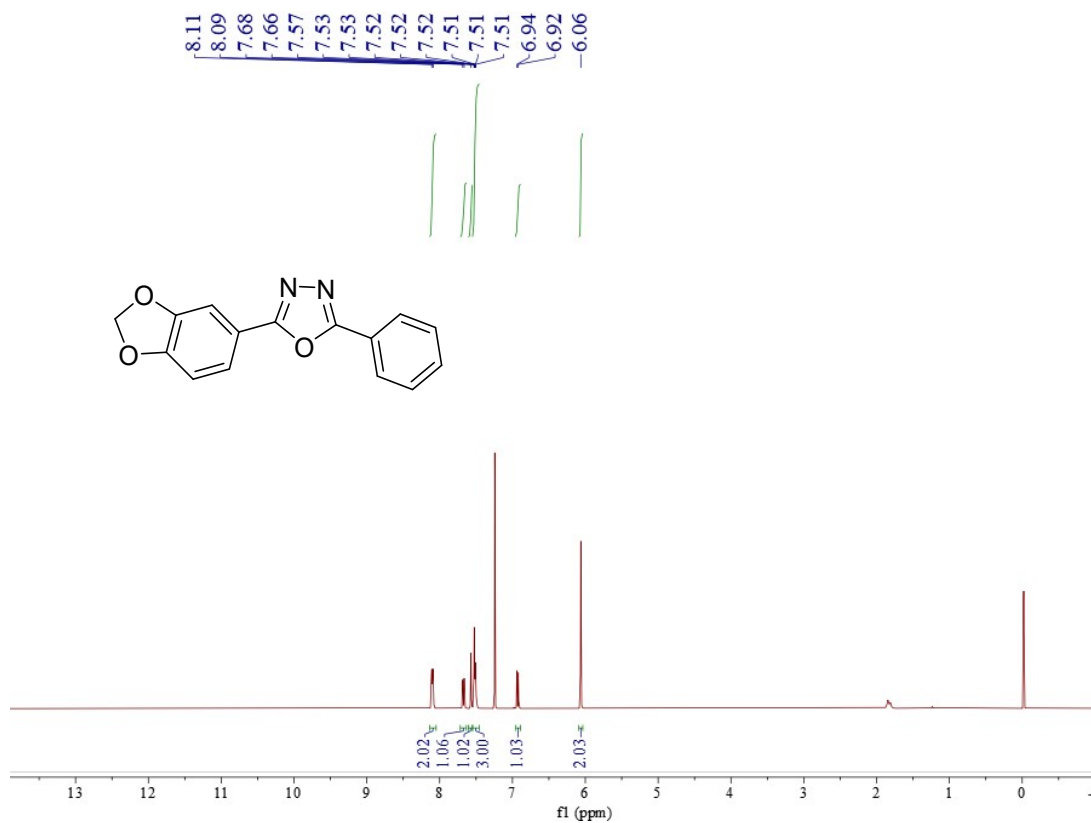

Fig. S38  $^1\text{H NMR}$  of 3q

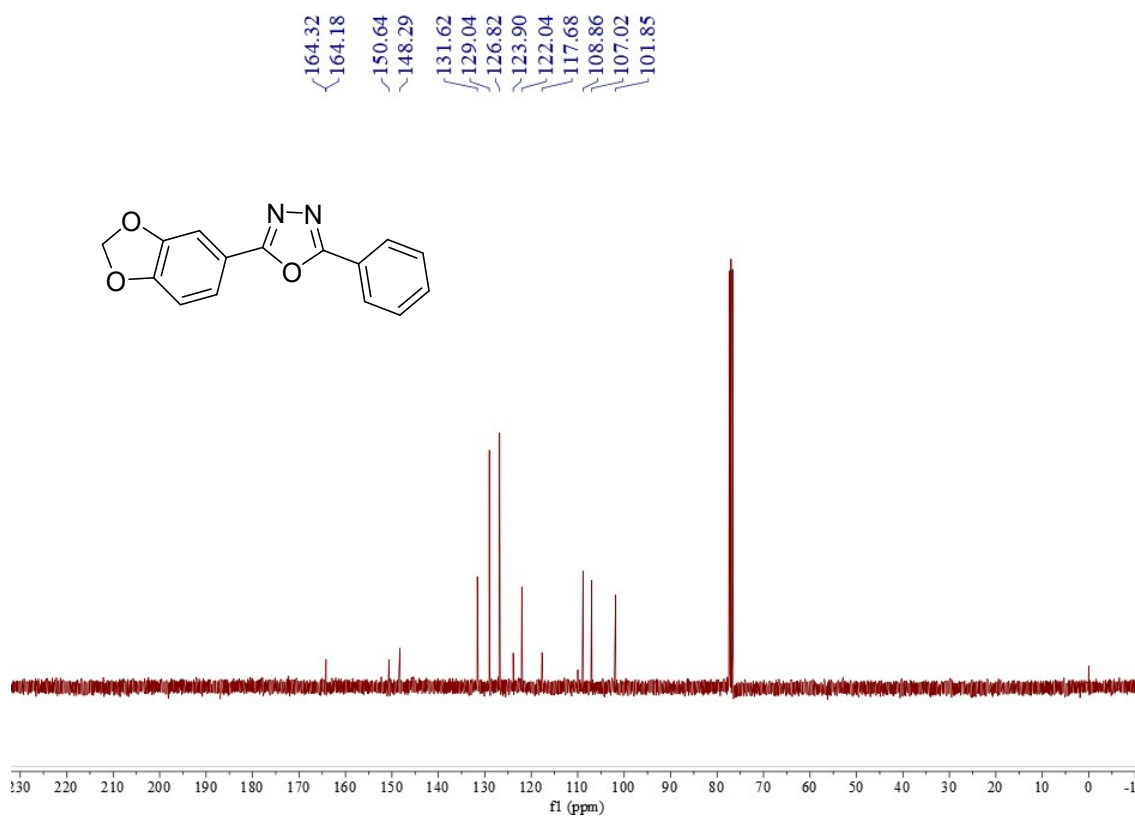

Fig. S39  $^{13}\text{C NMR}$  of 3q



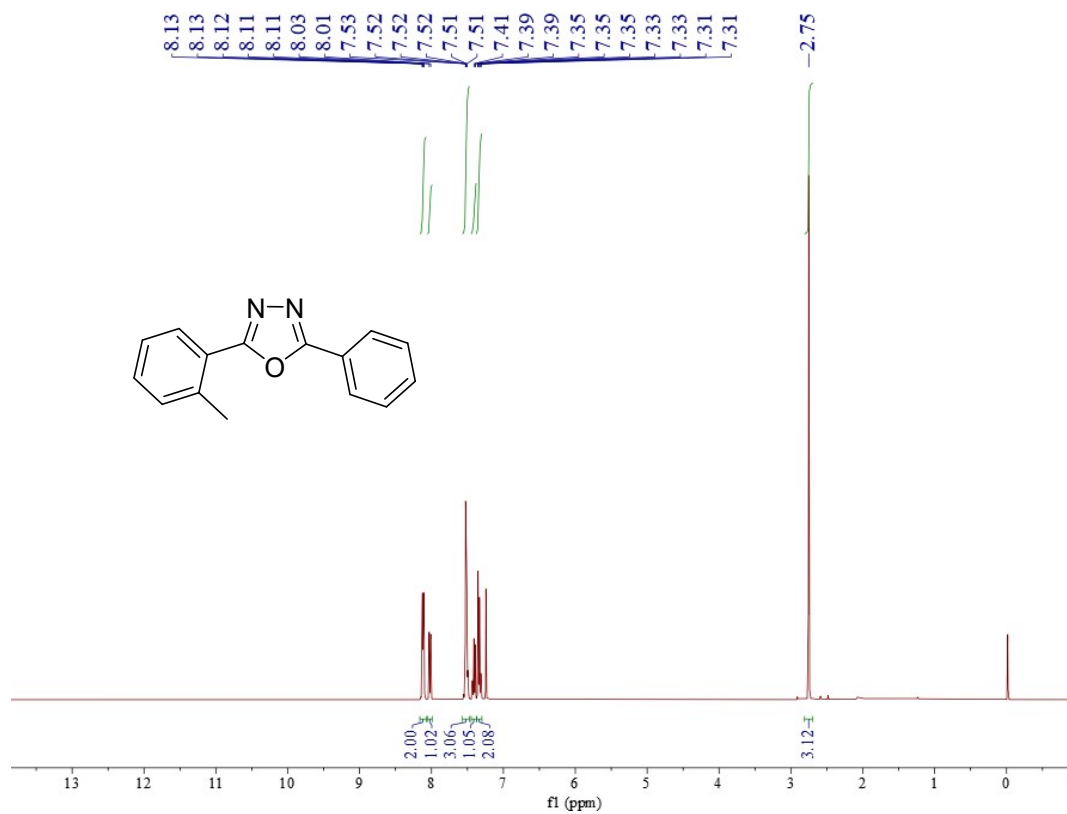

Fig. S40 <sup>1</sup>H NMR of 3r

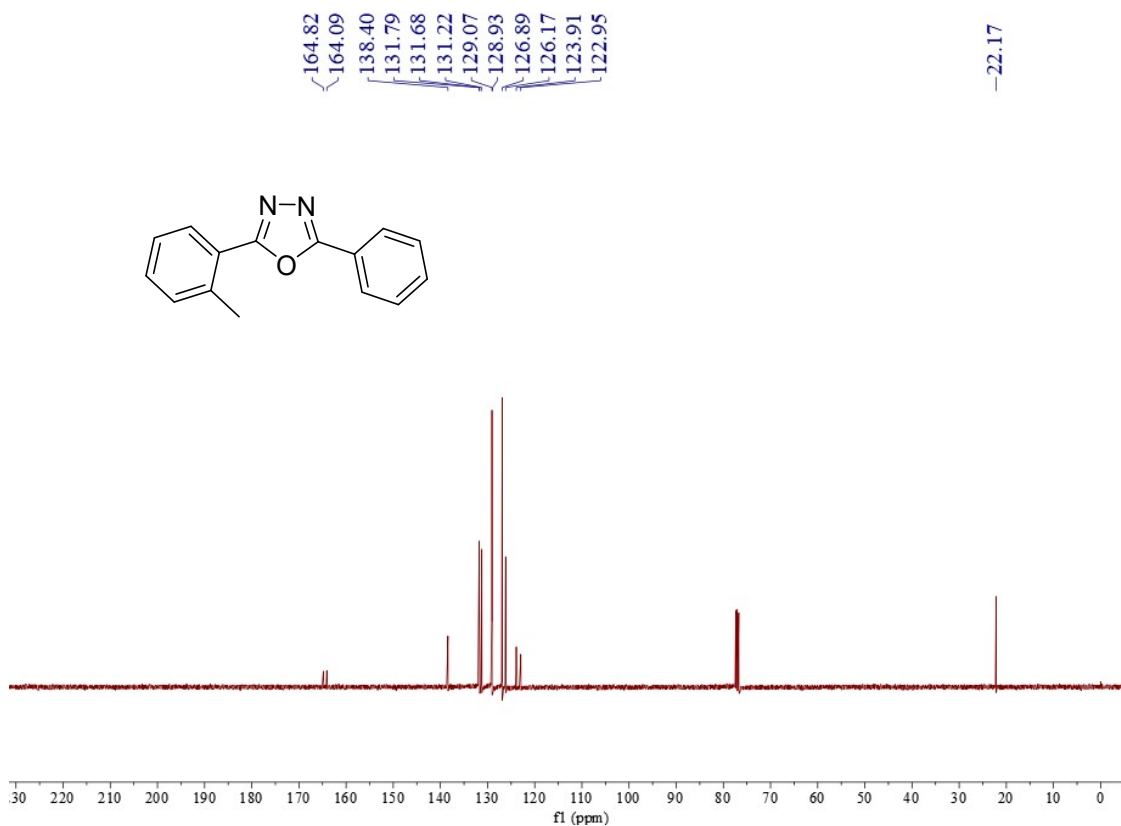

Fig. S41 <sup>13</sup>C NMR of 3r

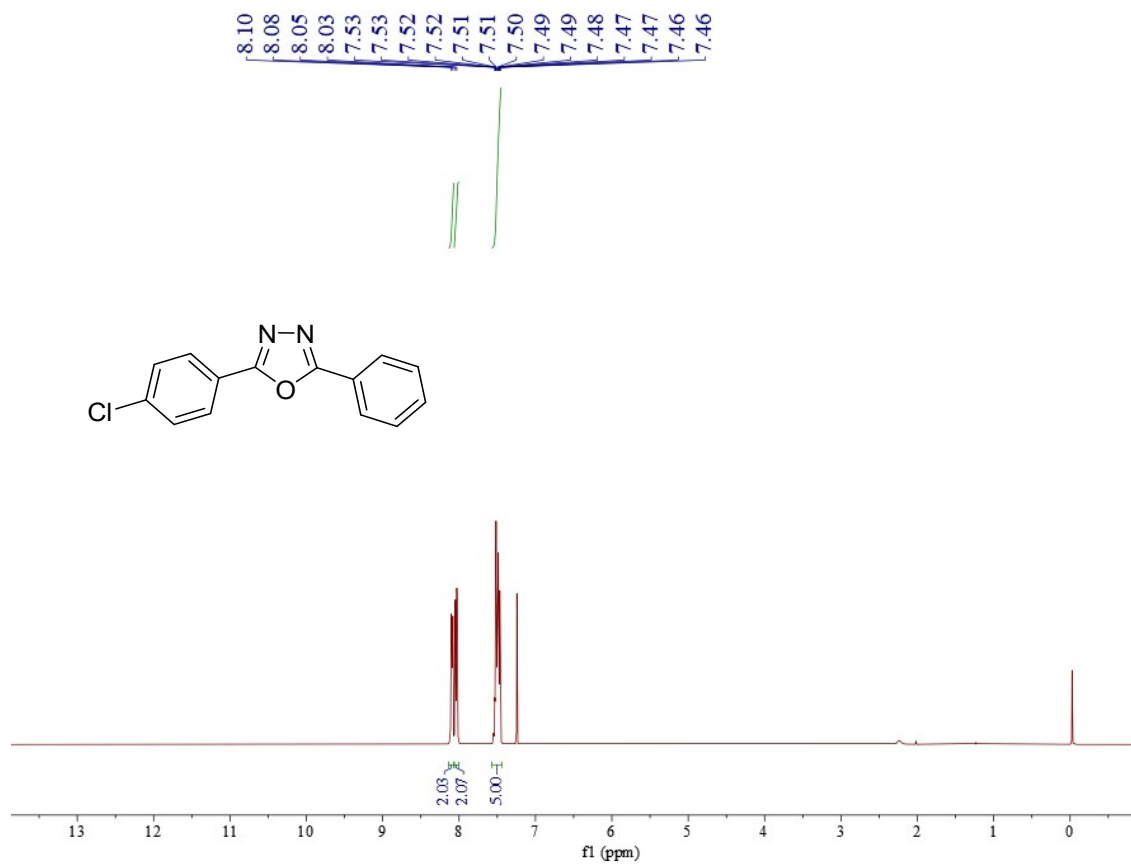

Fig. S42 <sup>1</sup>H NMR of 3s

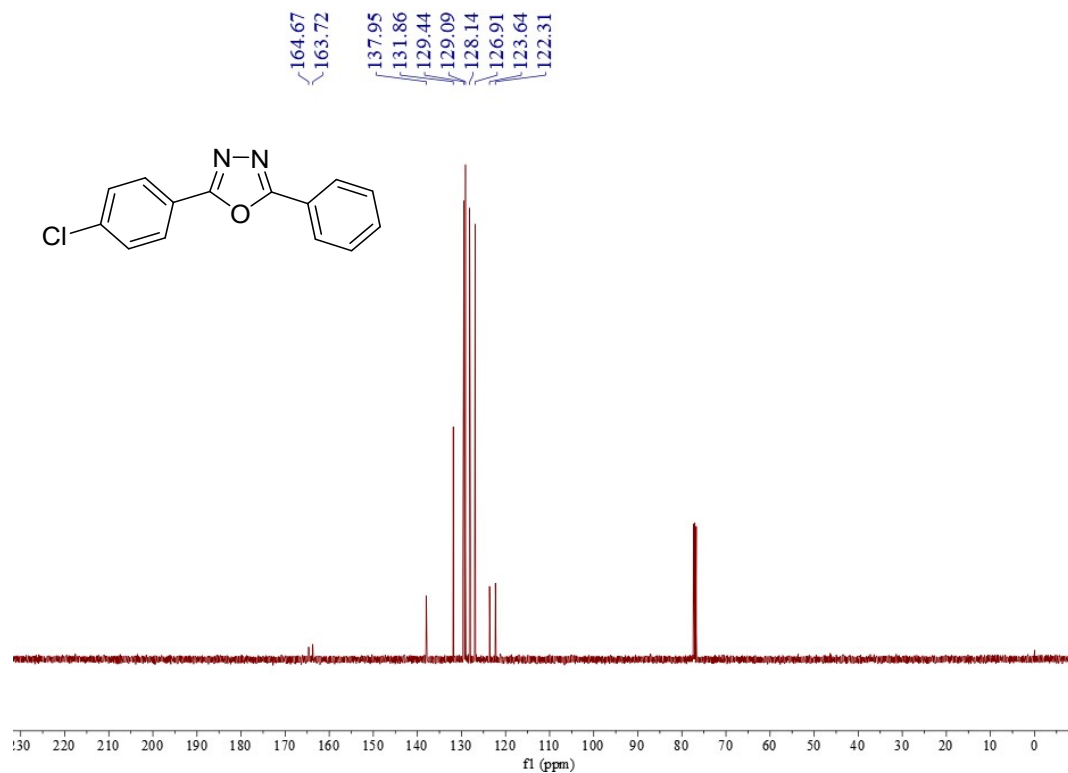

Fig. S43 <sup>13</sup>C NMR of 3s

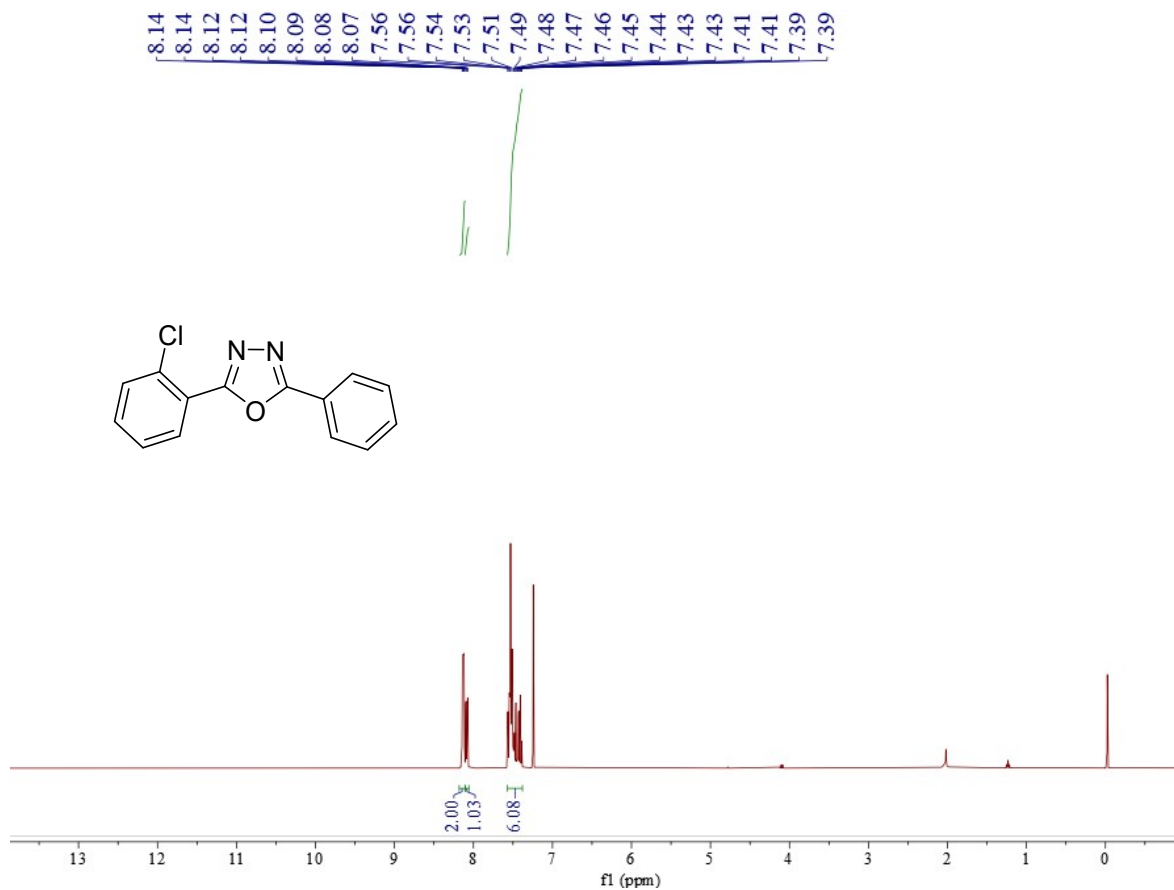

Fig. S44  $^1\text{H NMR}$  of 3t

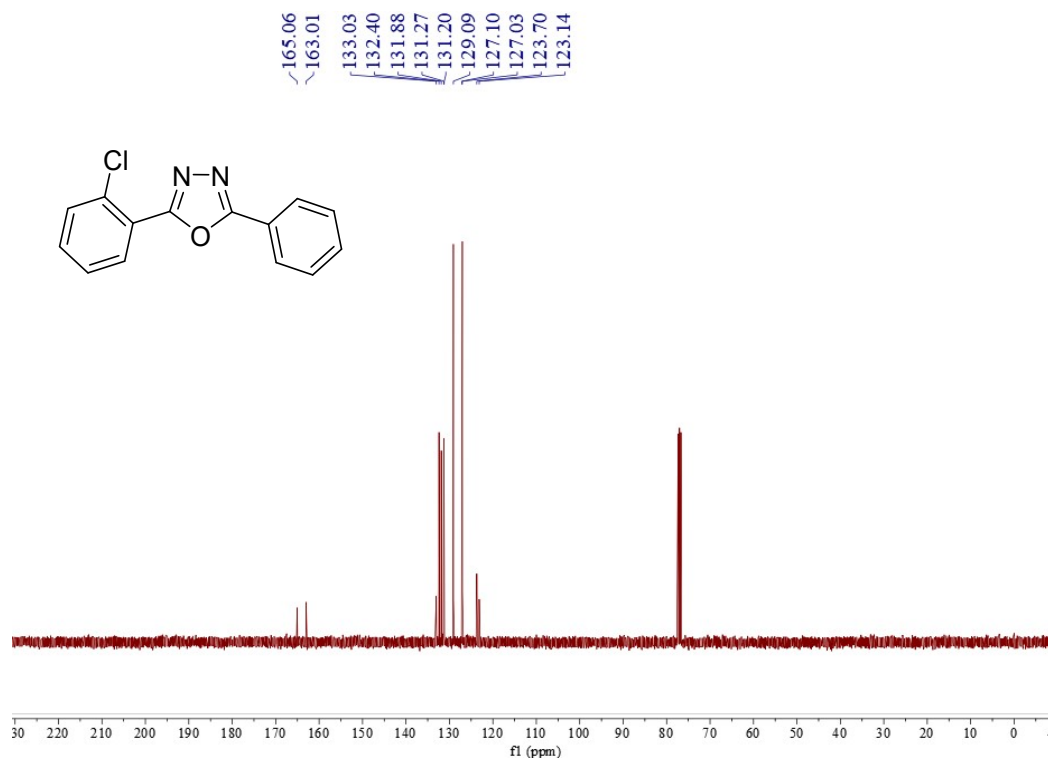

Fig. S45  $^{13}\text{C NMR}$  of 3t

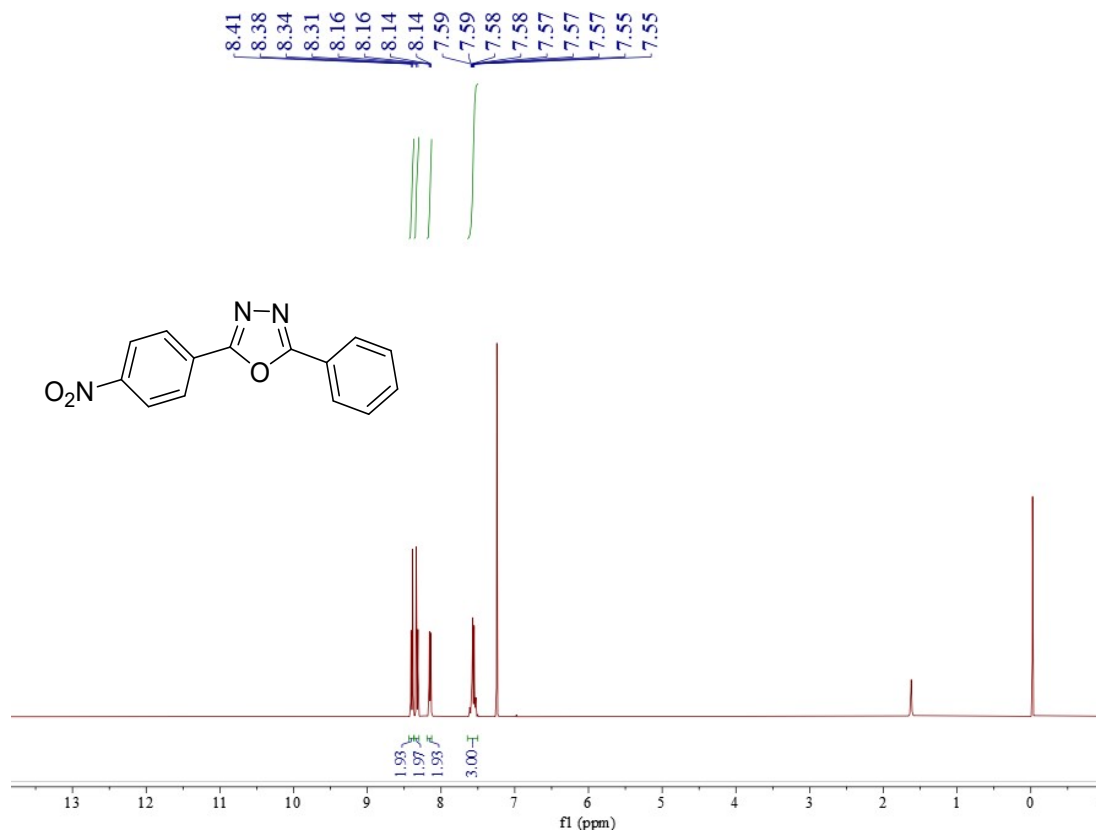

Fig. S46 <sup>1</sup>H NMR of 3u

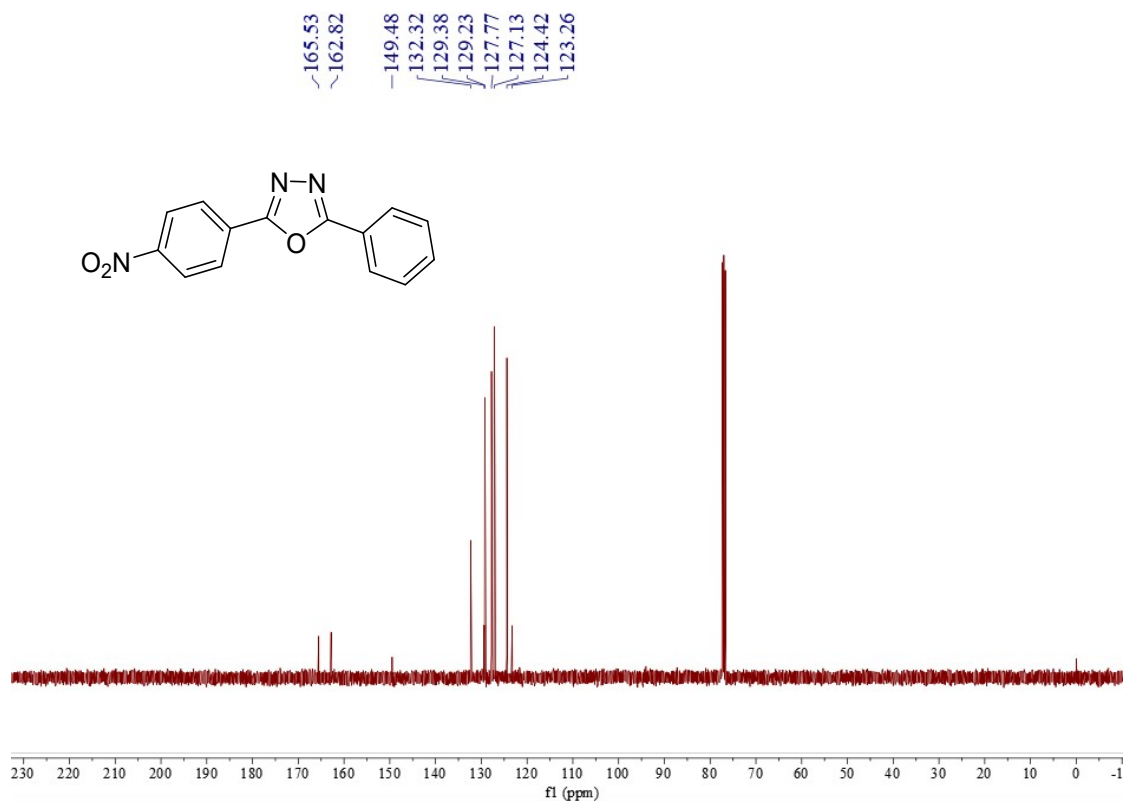

Fig. S47 <sup>13</sup>C NMR of 3u

## 8. Characterization of compound 7

### 2-phenyl-benzoxazole (7a)

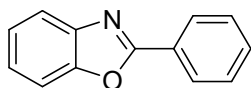

$^1\text{H}$  NMR (400 MHz,  $\text{CDCl}_3$ ):  $\delta$  8.30 – 8.25 (m, 2H), 7.83 – 7.76 (m, 1H), 7.59 – 7.54 (m, 1H), 7.57 – 7.52 (m, 3H), 7.38 – 7.34 (m, 2H);  $^{13}\text{C}$  NMR (101 MHz,  $\text{CDCl}_3$ ):  $\delta$  163.0, 150.6, 141.6, 131.7, 129.0, 127.7, 126.8, 125.3, 124.7, 119.9, 110.6.

### 2-phenyl-5-methylbenzoxazole (7b)

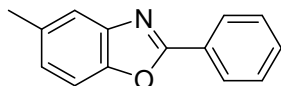

$^1\text{H}$  NMR (400 MHz,  $\text{CDCl}_3$ ):  $\delta$  8.30 – 8.23 (m, 2H), 7.61 – 7.50 (m, 4H), 7.47 (d,  $J = 8.3$  Hz, 1H), 7.21 – 7.14 (m, 1H), 2.49 (s, 3H);  $^{13}\text{C}$  NMR (101 MHz,  $\text{CDCl}_3$ ):  $\delta$  163.1, 149.1, 141.8, 134.6, 131.6, 128.9, 127.6, 127.0, 126.3, 119.8, 110.0, 21.5.

### 6-methyl-2-phenylbenzoxazole (7c)

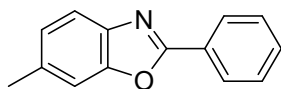

$^1\text{H}$  NMR (400 MHz,  $\text{CDCl}_3$ ):  $\delta$  8.32 – 8.20 (m, 2H), 7.69 (d,  $J = 7.7$  Hz, 1H), 7.57 – 7.49 (m, 3H), 7.40 (s, 1H), 7.18 (d,  $J = 7.7$  Hz, 1H), 2.51 (s, 3H);  $^{13}\text{C}$  NMR (101 MHz,  $\text{CDCl}_3$ ):  $\delta$  167.5, 150.6, 139.3, 135.4, 131.1, 128.6, 127.1, 126.8, 125.5, 118.9, 110.5, 21.4.

### 4-methyl-2-phenylbenzo[d]oxazole (7d)

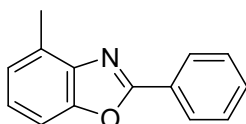

$^1\text{H}$  NMR (400 MHz,  $\text{CDCl}_3$ ):  $\delta$  8.32 – 8.26 (m, 2H), 7.55 – 7.51 (m, 3H), 7.43 – 7.39 (m, 1H), 7.19 – 7.25 (m, 1H), 7.19 – 7.12 (m, 1H), 2.69 (s, 3H);  $^{13}\text{C}$  NMR (101 MHz,  $\text{CDCl}_3$ ):  $\delta$  162.5, 150.5, 141.5, 131.0, 130.7, 128.7, 127.6, 127.2, 124.7, 124.6, 107.5, 16.5.

### 5-(tert-butyl)-2-phenylbenzo[d]oxazole (7e)

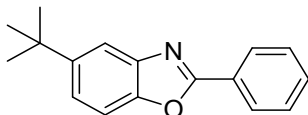

$^1\text{H}$  NMR (400 MHz,  $\text{CDCl}_3$ ):  $\delta$  8.28 – 8.23 (m, 2H), 7.81 (s, 1H), 7.55 – 7.48 (m, 4H), 7.42 (dd,  $J = 8.6, 1.6$  Hz, 1H), 1.40 (s, 9H);  $^{13}\text{C}$  NMR (101 MHz,  $\text{CDCl}_3$ ):  $\delta$  163.2, 148.1, 141.9, 131.4, 128.9, 127.5, 127.3, 122.9, 116.5, 109.7, 34.9, 31.7.

### 5-methoxy-2-phenylbenzo[d]oxazole (7f)

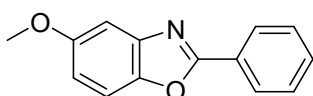

$^1\text{H}$  NMR (400 MHz,  $\text{CDCl}_3$ ):  $\delta$  8.28 – 8.21 (m, 2H), 7.56 – 7.50 (m, 3H), 7.47 (d,  $J = 8.9$  Hz, 1H), 7.27 (d,

$J = 2.5$  Hz, 1H), 6.98 – 6.94 (m, 1H), 3.88 (s, 3H);  $^{13}\text{C}$ NMR (101 MHz,  $\text{CDCl}_3$ ):  $\delta$  164.1, 157.7, 145.6, 142.8, 131.9, 129.2, 127.8, 127.3, 114.2, 111.1, 102.9, 56.2.

**phenyl-5-chlorobenzoxazole (7g)**

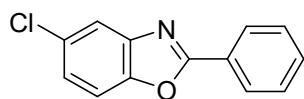

$^1\text{H}$  NMR (400 MHz,  $\text{CDCl}_3$ ):  $\delta$  8.28 – 8.21 (m, 2H), 7.75 (dd,  $J = 2.1$  Hz, 1H), 7.63 – 7.47 (m, 4H), 7.36 – 7.27 (dd, 1H);  $^{13}\text{C}$  NMR (101 MHz,  $\text{CDCl}_3$ ):  $\delta$  164.4, 149.3, 143.2, 131.9, 130.1, 129.0, 128.7, 127.7, 126.6, 125.4, 119.9, 110.3.

**4-bromo-2-phenylbenzo[d]oxazole (7h)**

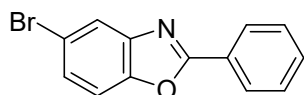

$^1\text{H}$  NMR (400 MHz,  $\text{CDCl}_3$ ):  $\delta$  8.22 (dd,  $J = 7.9, 1.8$  Hz, 2H), 7.89 (t,  $J = 1.2$  Hz, 1H), 7.62 – 7.48 (m, 3H), 7.45 (s, 2H);  $^{13}\text{C}$  NMR (101 MHz,  $\text{CDCl}_3$ ):  $\delta$  164.4, 150.0, 143.9, 132.3, 129.3, 128.4, 128.0, 126.8, 123.2, 117.6, 112.1.

**5-nitro-2-phenylbenzo[d]oxazole (7i)**

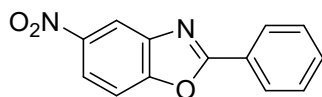

$^1\text{H}$  NMR (400 MHz,  $\text{CDCl}_3$ ):  $\delta$  8.64 (d,  $J = 2.3$  Hz, 1H), 8.32 (dd, 1H), 8.26 (d,  $J = 6.9$  Hz, 2H), 7.68 (d,  $J = 8.9$  Hz, 1H), 7.65 – 7.59 (m, 1H), 7.59 – 7.52 (m, 2H);  $^{13}\text{C}$  NMR (101 MHz,  $\text{CDCl}_3$ ):  $\delta$  166.0, 154.3, 145.4, 142.5, 132.6, 129.1, 128.0, 125.9, 121.1, 116.3, 110.7.

**2-phenylbenzo[d]oxazole-5-carboxylates (7j)**

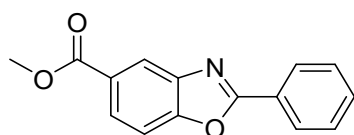

$^1\text{H}$  NMR (400 MHz,  $\text{CDCl}_3$ ):  $\delta$  8.46 (d,  $J = 1.2$  Hz, 1H), 8.26 (dd,  $J = 7.9, 1.7$  Hz, 2H), 8.11 (dd,  $J = 8.6, 1.7$  Hz, 1H), 7.61 (d,  $J = 8.5$  Hz, 1H), 7.58 – 7.50 (m, 3H), 3.96 (s, 3H);  $^{13}\text{C}$  NMR (101 MHz,  $\text{CDCl}_3$ ):  $\delta$  166.7, 164.3, 153.6, 142.1, 132.0, 129.0, 127.8, 127.1, 126.5, 121.9, 110.4, 52.4.

**methyl 2-phenylbenzoxazole-6-carboxylate (7k)**

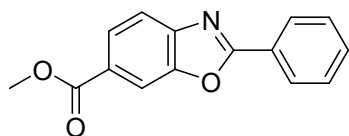

$^1\text{H}$  NMR (400 MHz,  $\text{CDCl}_3$ ):  $\delta$  8.32 – 8.25 (m, 3H), 8.10 (dd,  $J = 8.3, 1.5$  Hz, 1H), 7.80 (dd,  $J = 8.4$  Hz, 1H), 7.61 – 7.50 (m, 3H), 3.97 (s, 3H);  $^{13}\text{C}$  NMR (101 MHz,  $\text{CDCl}_3$ ):  $\delta$  132.2, 129.0, 127.9, 126.5 (d,  $J = 31.1$  Hz), 119.5, 112.3, 52.4.

### 2,6-diphenylbenzoxazole (7l)

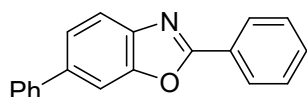

$^1\text{H NMR}$  (400 MHz,  $\text{CDCl}_3$ ):  $\delta$  8.32 – 8.26 (m, 2H), 7.99 (m, 1H), 7.70 – 7.62 (m, 3H), 7.62 – 7.57 (m, 1H), 7.57 – 7.52 (m, 3H), 7.53 – 7.44 (m, 2H), 7.43 – 7.32 (m, 1H);  $^{13}\text{C NMR}$  (101 MHz,  $\text{CDCl}_3$ ):  $\delta$  163.7, 151.6, 142.7, 141.0, 138.5, 131.7, 128.9 (d,  $J = 23.4$  Hz), 127.6, 127.5, 127.3, 127.1, 124.8, 118.4, 110.6.

### 2-(4-methoxyphenyl) benzoxazole (7m)

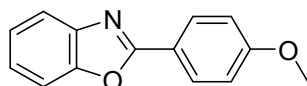

$^1\text{H NMR}$  (400 MHz,  $\text{CDCl}_3$ ):  $\delta$  8.29 (d, 2H), 7.88 – 7.73 (m, 1H), 7.67 – 7.54 (m, 1H), 7.41 – 7.34 (m, 2H), 7.06 (d,  $J = 5.5$  Hz, 2H), 3.91 (s, 3H);  $^{13}\text{C NMR}$  (101 MHz,  $\text{CDCl}_3$ ):  $\delta$  162.9, 150.7, 142.2, 129.7, 125.0, 124.9, 119.7, 119.2, 114.5, 110.6, 55.5.

### 5-fluoro-2-(4-methoxyphenyl) benzo[d]oxazole (7n)

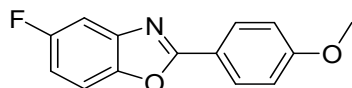

$^1\text{H NMR}$  (400 MHz,  $\text{CDCl}_3$ ):  $\delta$  8.18 (d,  $J = 8.6$  Hz, 2H), 7.52 – 7.38 (m, 2H), 7.09 – 7.00 (m, 3H), 3.90 (s, 3H);  $^{13}\text{C NMR}$  (101 MHz,  $\text{DMSO-}d_6$ ):  $\delta$  164.7, 162.8, 147.1, 129.7, 118.9, 115.3, 112.6, 111.9, 106.5, 106.2, 56.0.

### 2-phenylbenzothiazole (7o)

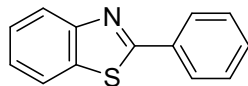

$^1\text{H NMR}$  (400 MHz,  $\text{CDCl}_3$ ):  $\delta$  8.23 – 8.15 (m, 3H), 7.93 (d,  $J = 8.0$  Hz, 1H), 7.59 – 7.51 (m, 4H), 7.44 (t,  $J = 7.6$  Hz, 1H);  $^{13}\text{C NMR}$  (101 MHz,  $\text{CDCl}_3$ ):  $\delta$  168.1, 154.1, 135, 133.1, 131.0, 128.7, 127.2, 126.0, 124.9, 122.9, 121.3.

### 6-methoxy-2-phenylbenzothiazole (7p)

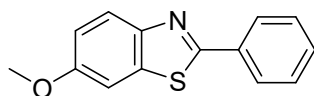

$^1\text{H NMR}$  (400 MHz,  $\text{CDCl}_3$ ):  $\delta$  8.07 (s, 2H), 8.00 (d,  $J = 9.0$  Hz, 1H), 7.49 (s, 3H), 7.36 (s,  $J = 2.6$  Hz, 1H), 7.11 (d,  $J = 9.0, 2.5$  Hz, 1H), 3.90 (s, 3H);  $^{13}\text{C NMR}$  (101 MHz,  $\text{CDCl}_3$ ):  $\delta$  165.9, 158.1, 148.6, 137.6, 134.6, 131.1, 129.3, 127.6, 123.8, 116.1, 104.4, 56.1.

### 4-chloro-2-phenylbenzoxazole (7q)

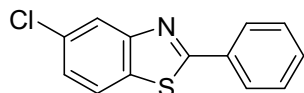

$^1\text{H NMR}$  (400 MHz,  $\text{CDCl}_3$ ):  $\delta$  8.25 (d,  $J = 4.8$  Hz, 2H), 7.76 (d,  $J = 1.8$  Hz, 1H), 7.57 (d,  $J = 4.8$  Hz, 1H), 7.55 – 7.46 (m, 3H), 7.33 (dd,  $J = 6.5$  Hz, 1.4 Hz, 1H);  $^{13}\text{C NMR}$  (101 MHz,  $\text{CDCl}_3$ ):  $\delta$  165.0, 150.3, 143.1, 132.0, 130.0, 129.0, 127.7, 126.6, 125.4, 119.9, 111.3.

**5-bromo-2-phenylbenzo[d]thiazole (7r)**

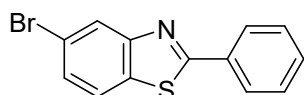

$^1\text{H}$  NMR (400 MHz,  $\text{CDCl}_3$ ):  $\delta$  8.26 (d,  $J = 1.4$  Hz, 1H), 8.11 – 8.08 (m, 2H), 7.77 (d,  $J = 6.4$  Hz, 1H), 7.54 – 7.49 (m, 4H);  $^{13}\text{C}$  NMR (101 MHz,  $\text{CDCl}_3$ ):  $\delta$  169.6, 155.8, 133.8, 132.0, 131.9, 129.4, 128.8, 128.0, 126.2, 123.0, 120.4.

**6-bromo-2-phenylbenzo[d]thiazole (7s)**

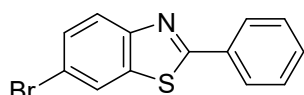

$^1\text{H}$  NMR (400 MHz,  $\text{CDCl}_3$ ):  $\delta$  8.12 – 8.07 (m), 8.05 (d,  $J = 1.4$  Hz, 1H), 7.95 (d,  $J = 6.5$  Hz, 1H), 7.60 (dd,  $J = 6.5, 1.4$  Hz), 7.54 – 7.47 (m, 3H);  $^{13}\text{C}$  NMR (101 MHz,  $\text{CDCl}_3$ ):  $\delta$  168.7, 152.6, 136.1, 132.8, 131.4, 130.0, 129.2, 127.7, 124.5, 124.2, 118.9.

**2-(4-methoxyphenyl) benzo[d]thiazole (7t)**

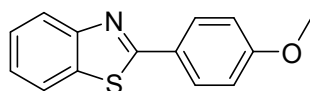

$^1\text{H}$  NMR (400 MHz,  $\text{CDCl}_3$ ):  $\delta$  8.09 – 8.03 (m,  $J = 7.6$  Hz, 3H), 7.88 (t,  $J = 6.3$  Hz, 1H), 7.48 (d,  $J = 6.3$  Hz, 1H), 7.37 (d,  $J = 5.7$  Hz, 1H), 7.01 (d,  $J = 6.6$  Hz, 2H), 3.89 (s, 3H);  $^{13}\text{C}$  NMR (101 MHz,  $\text{CDCl}_3$ ):  $\delta$  168.0, 162.0, 158.7, 137.0, 129.2, 126.3, 124.9, 122.6, 121.5, 114.4, 55.5.



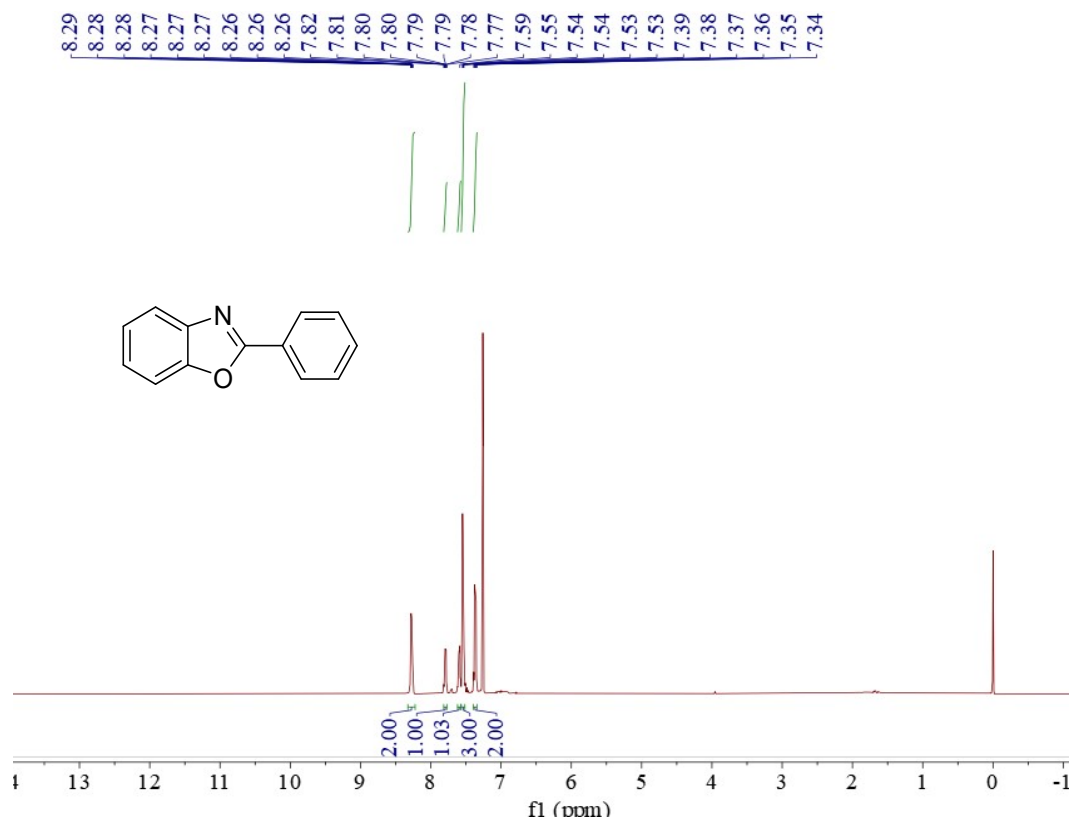

Fig. S48 <sup>1</sup>H NMR of 7a

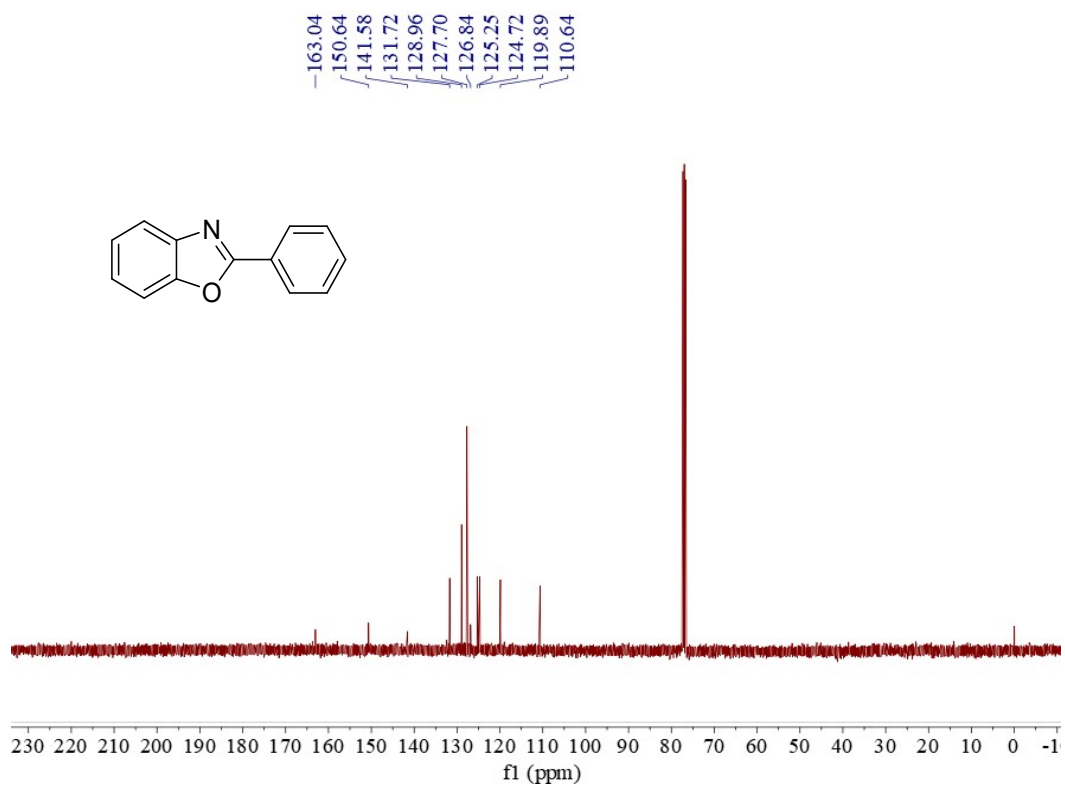

Fig. S49 <sup>13</sup>C NMR of 7a

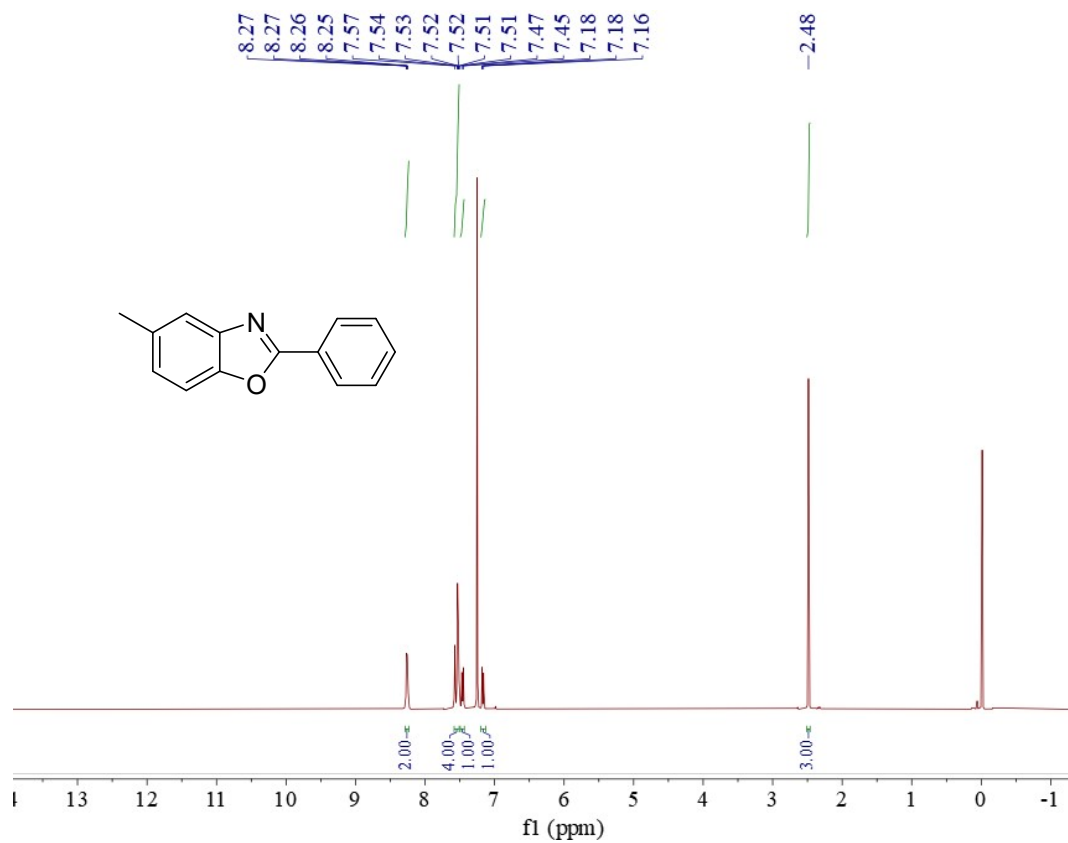

Fig. S50 <sup>1</sup>H NMR of 7b

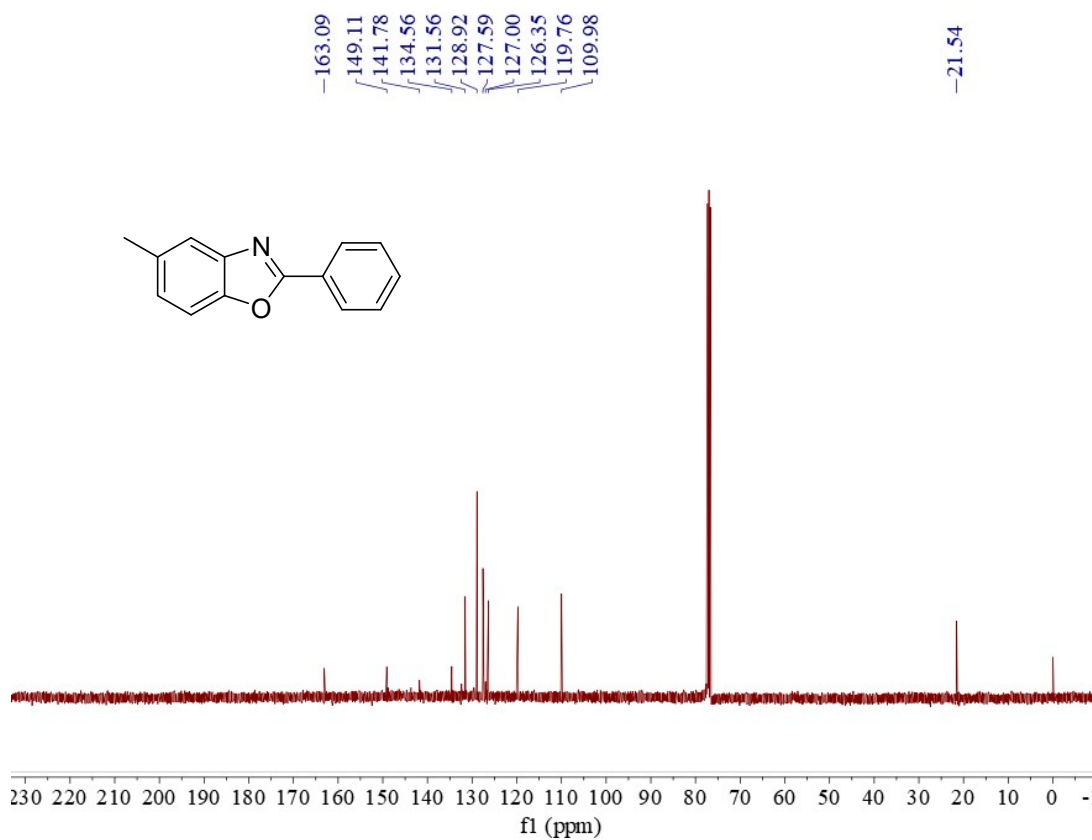

Fig. S51 <sup>13</sup>C NMR of 7b

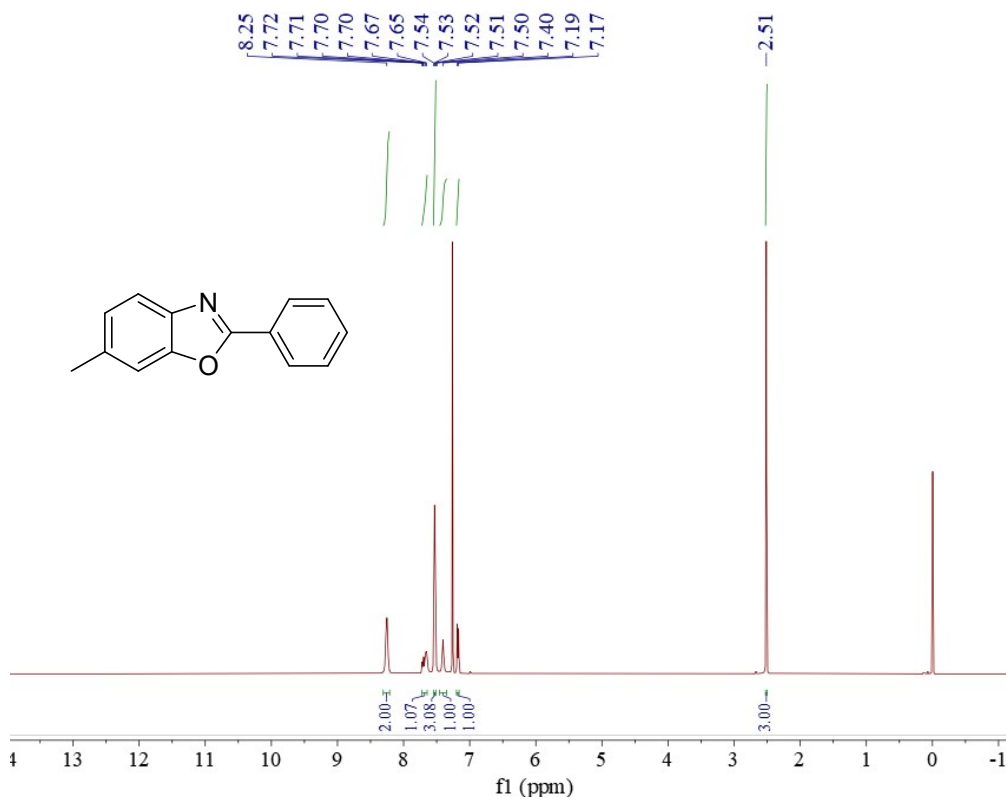

Fig. S52 <sup>1</sup>H NMR of 7c

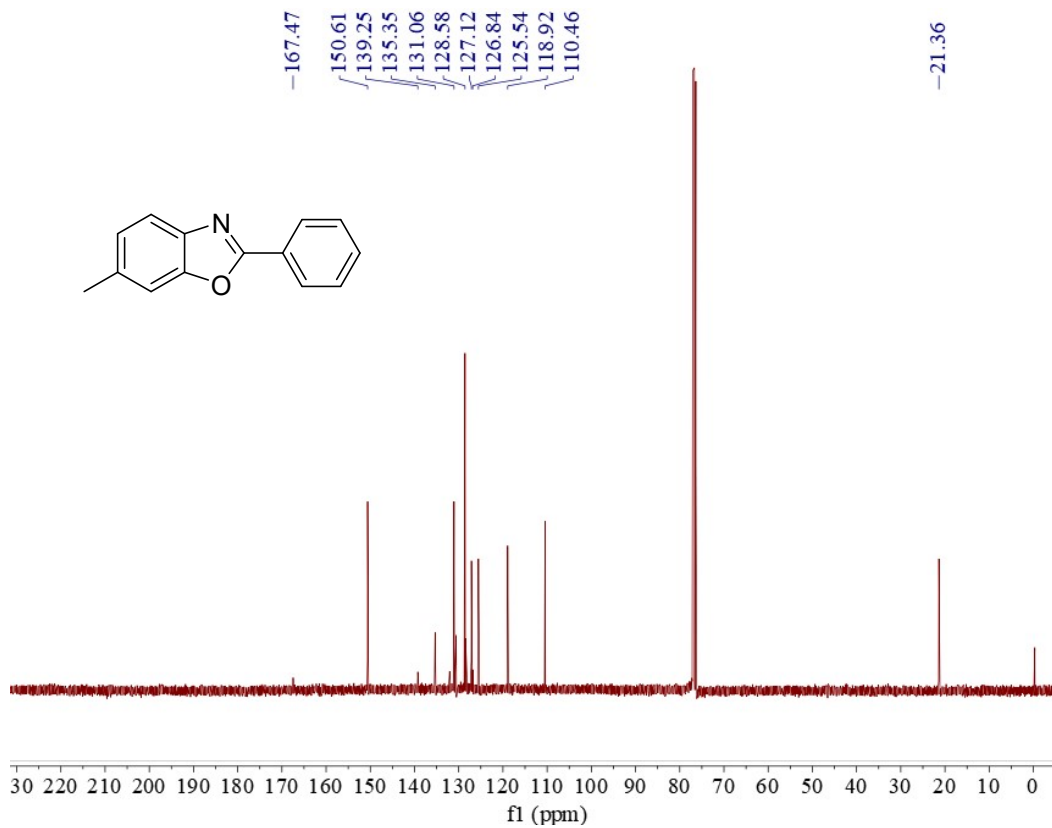

Fig. S53 <sup>13</sup>C NMR of 7c

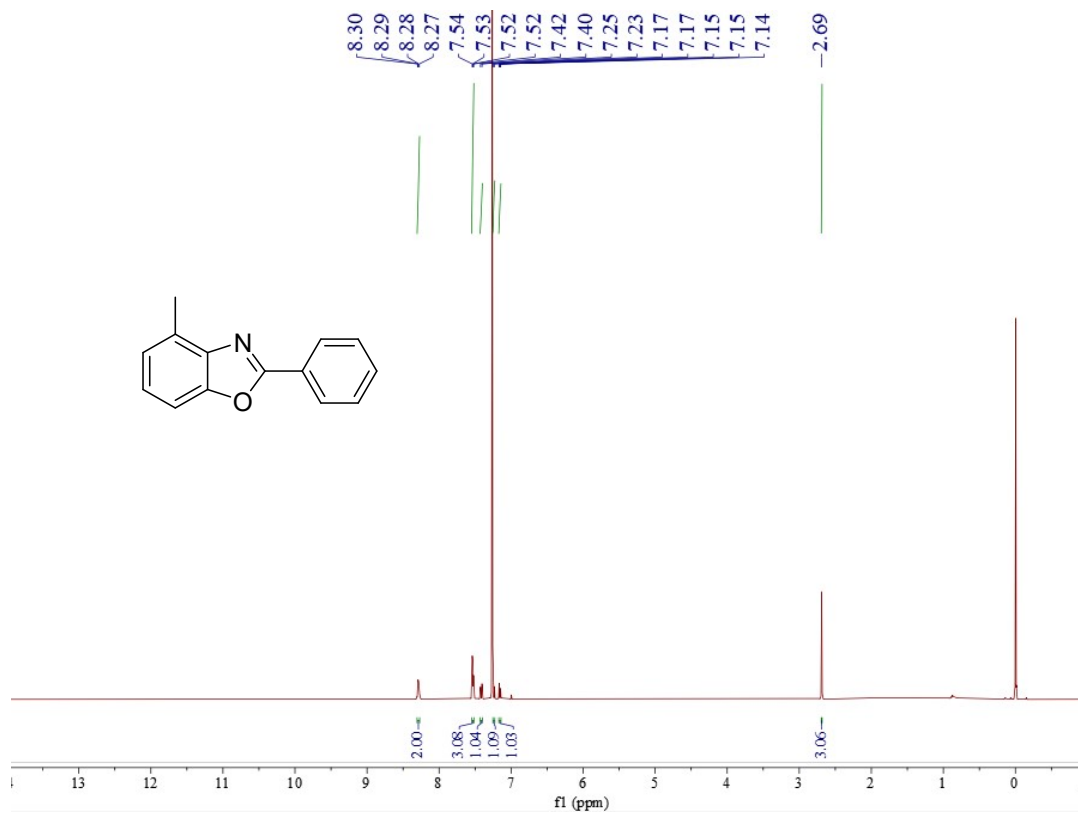

Fig. S54 <sup>1</sup>H NMR of 7d

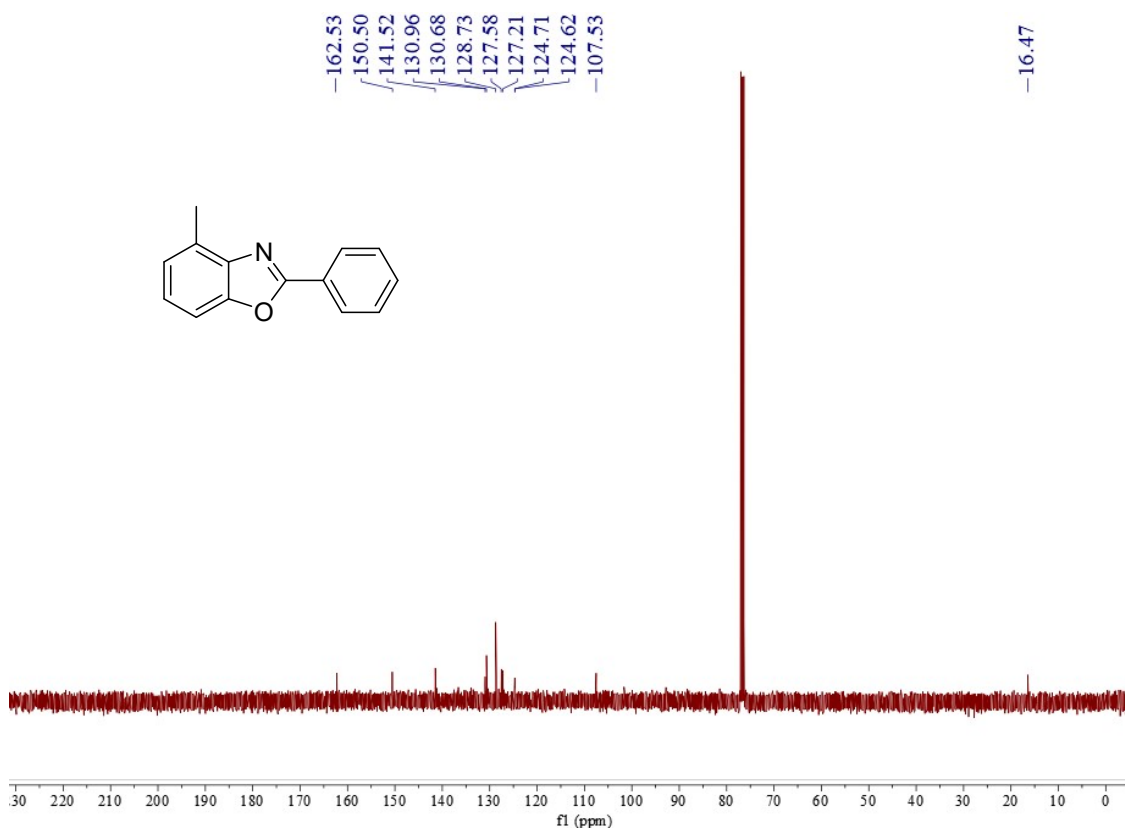

Fig. S55 <sup>13</sup>C NMR of 7d

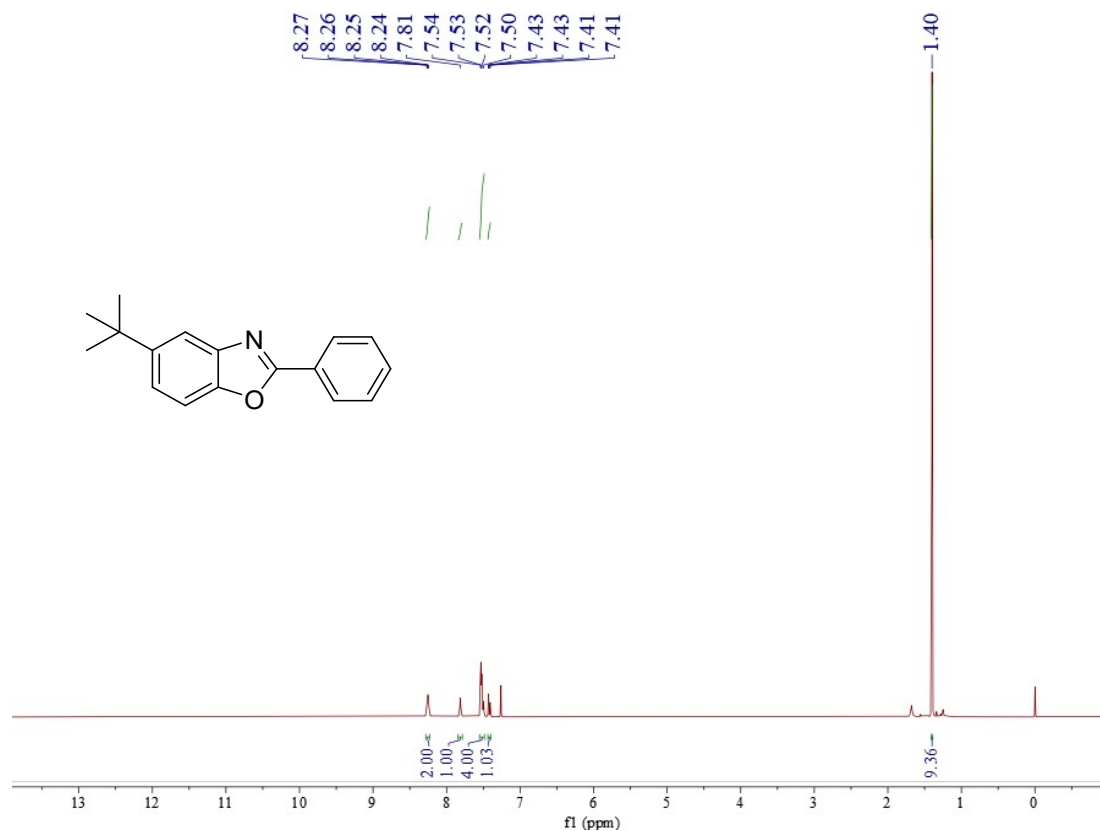

Fig. S56 <sup>1</sup>H NMR of 7e

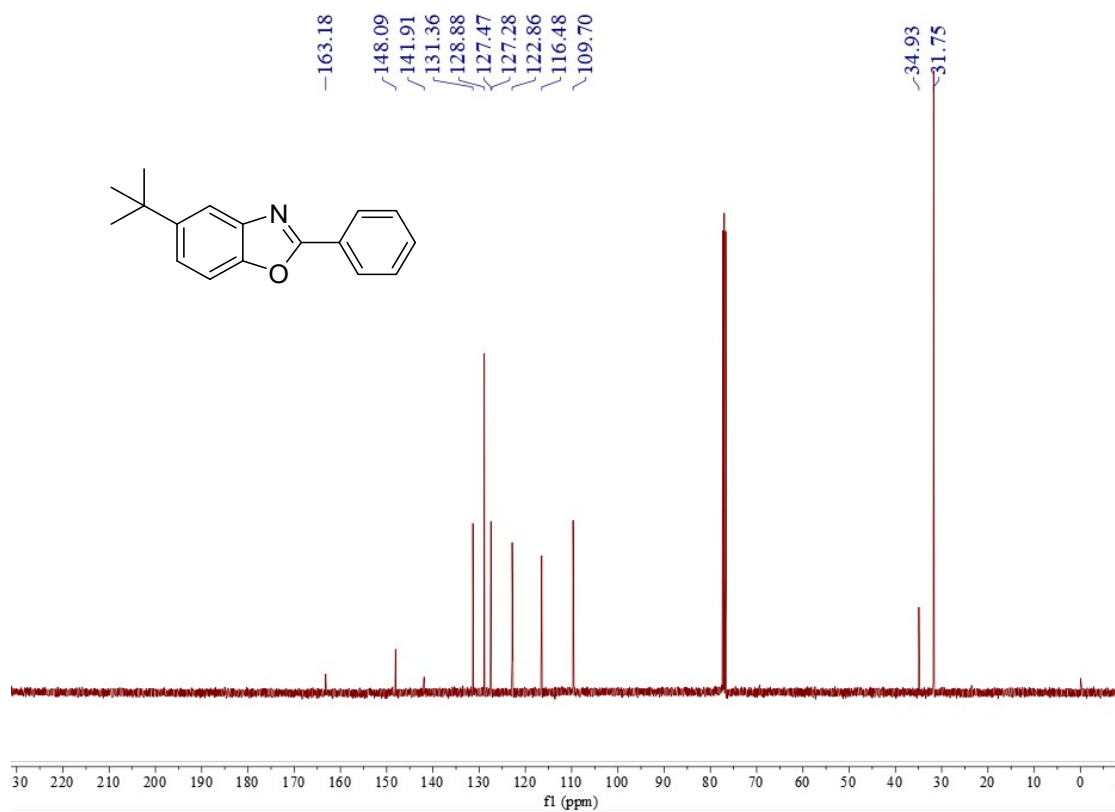

Fig. S57 <sup>13</sup>C NMR of 7e

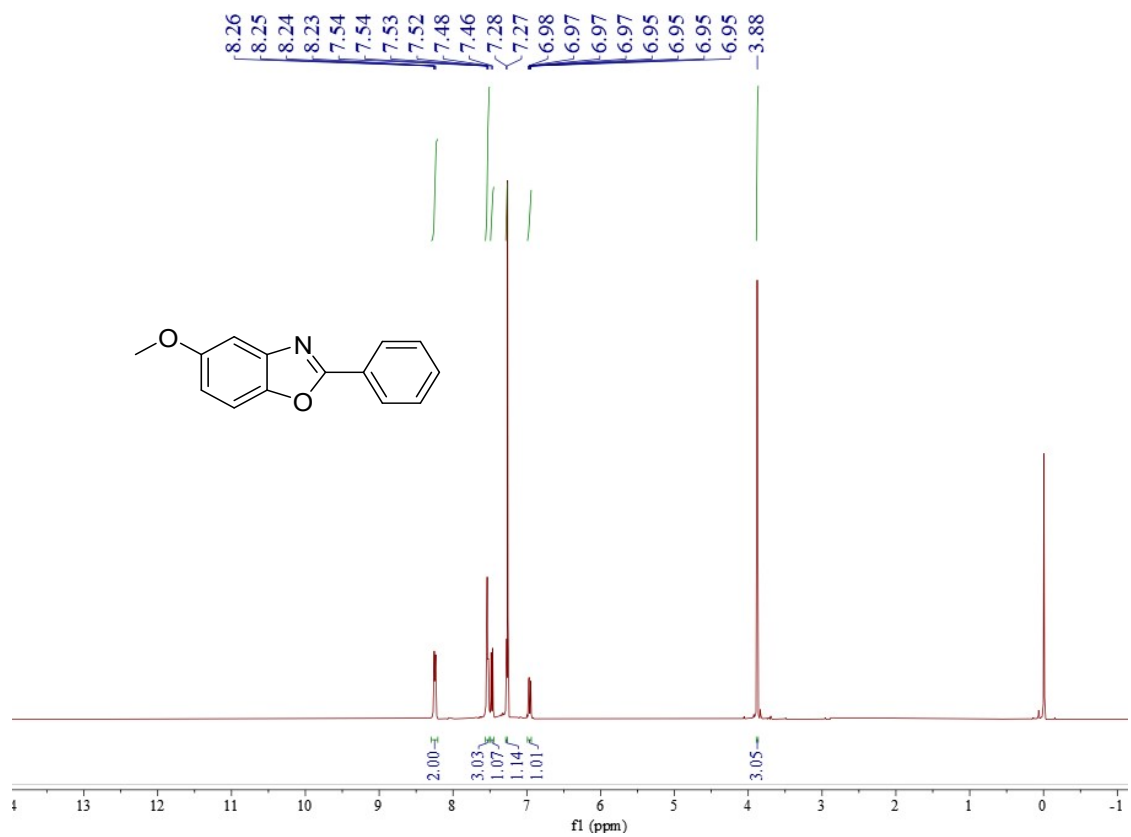

Fig. S58  $^1\text{H}$  NMR of 7f

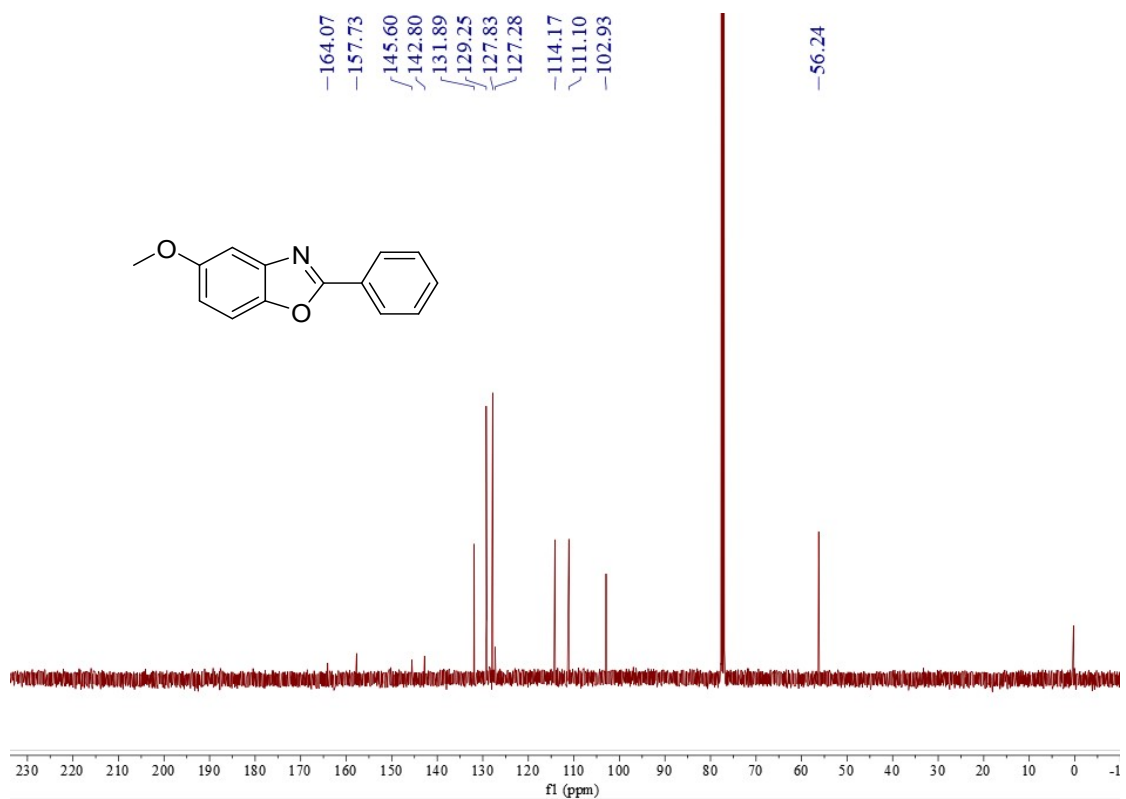

Fig. S59  $^{13}\text{C}$  NMR of 7f

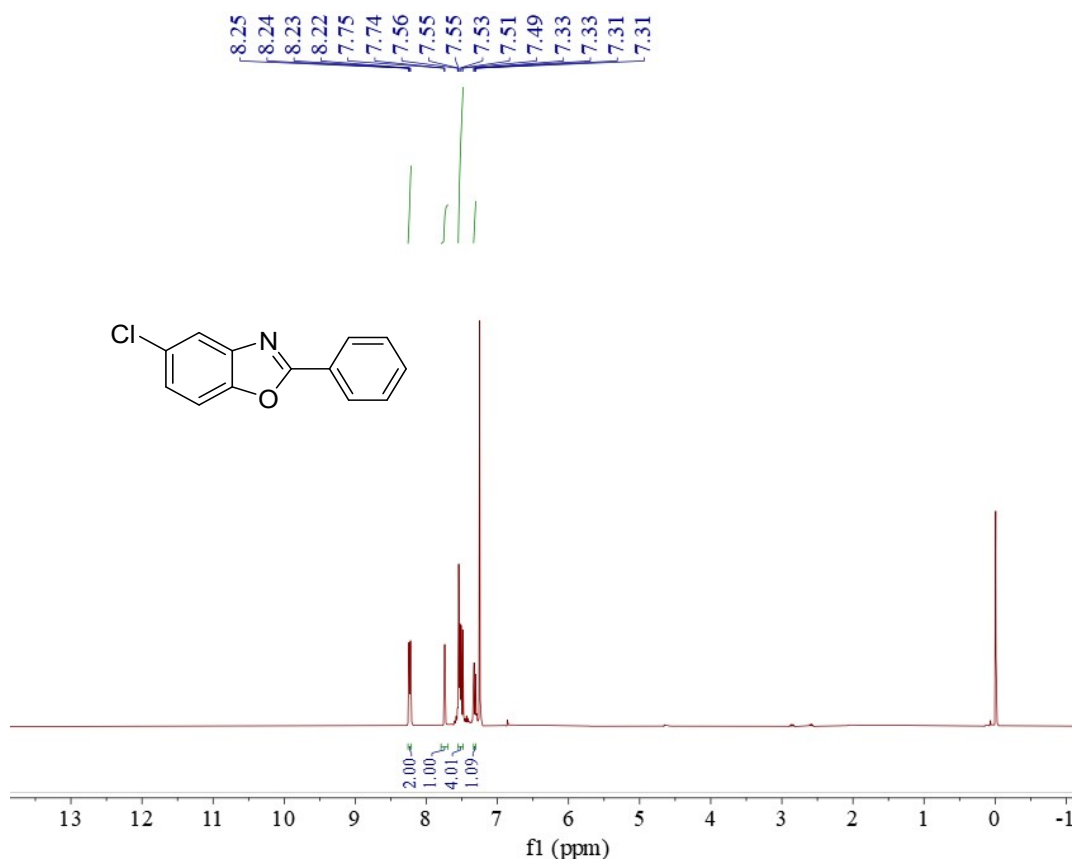

Fig. S60 <sup>1</sup>H NMR of 7g

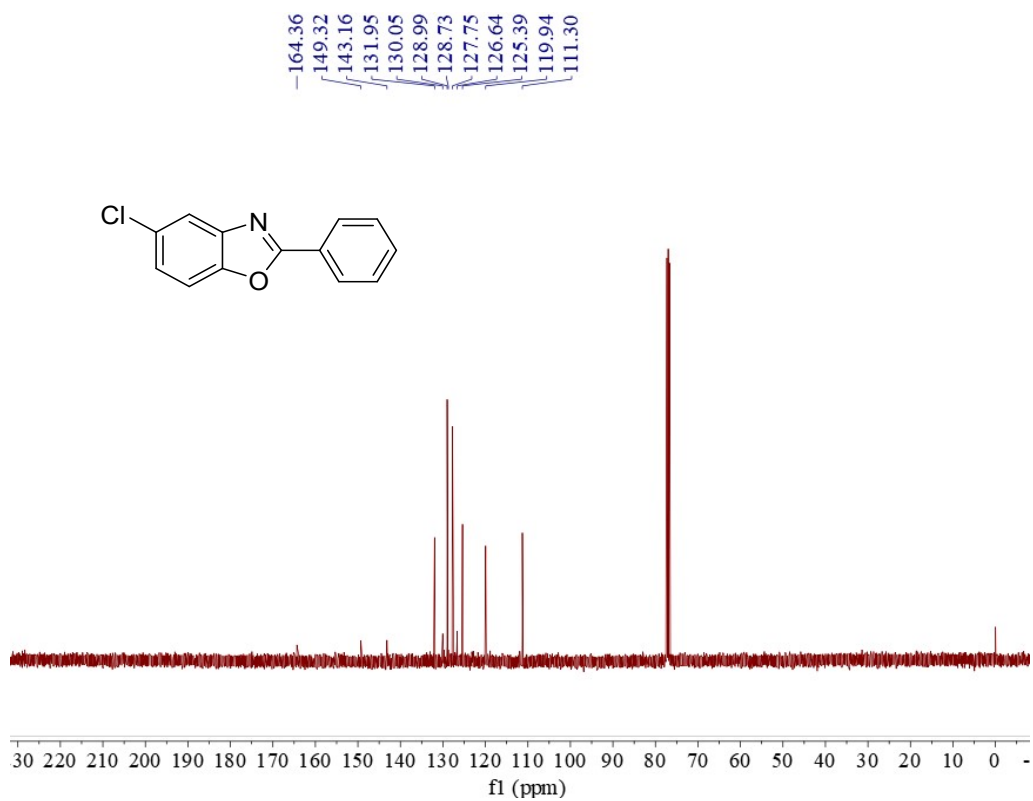

Fig. S61 <sup>13</sup>C NMR of 7g

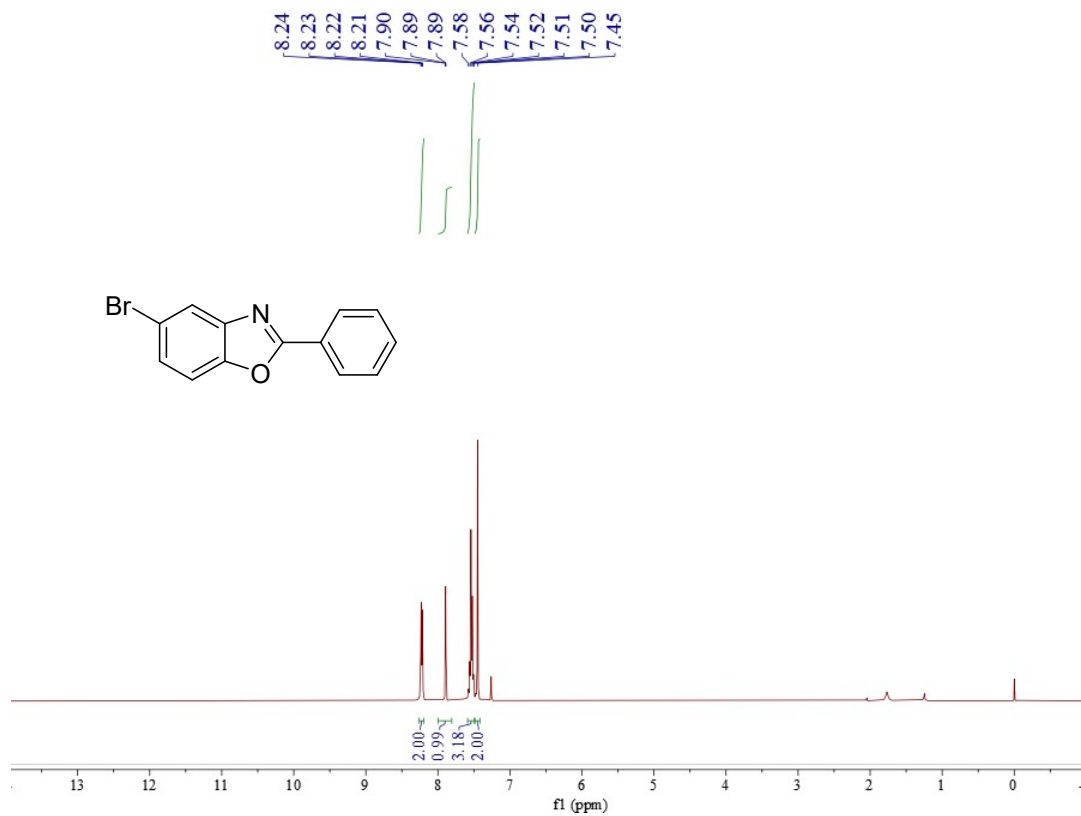

Fig. S62 <sup>1</sup>H NMR of 7h

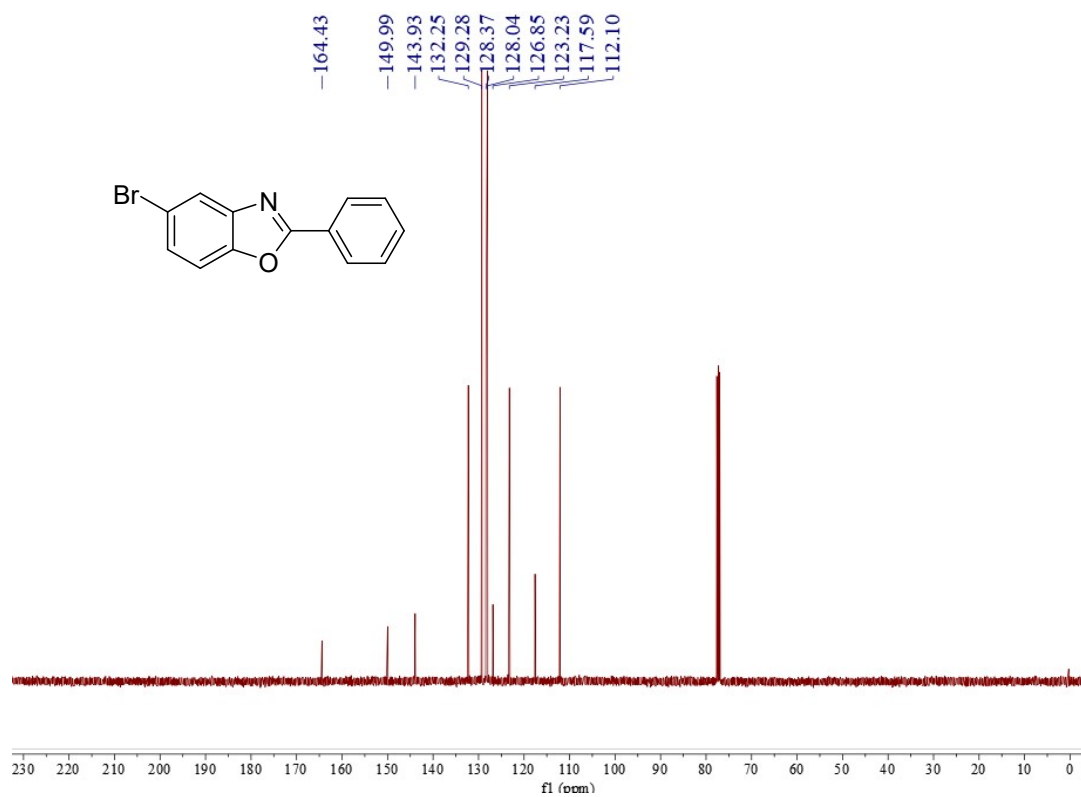

Fig. S63 <sup>13</sup>C NMR of 7h



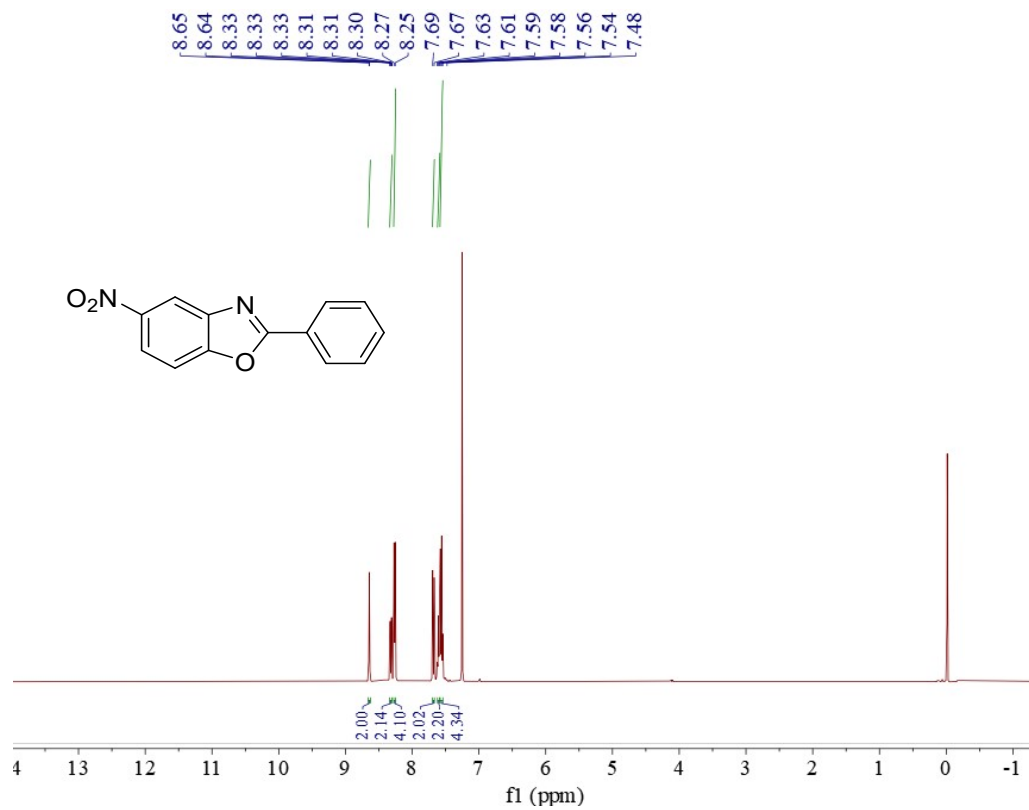

Fig. S64 <sup>1</sup>H NMR of 7i

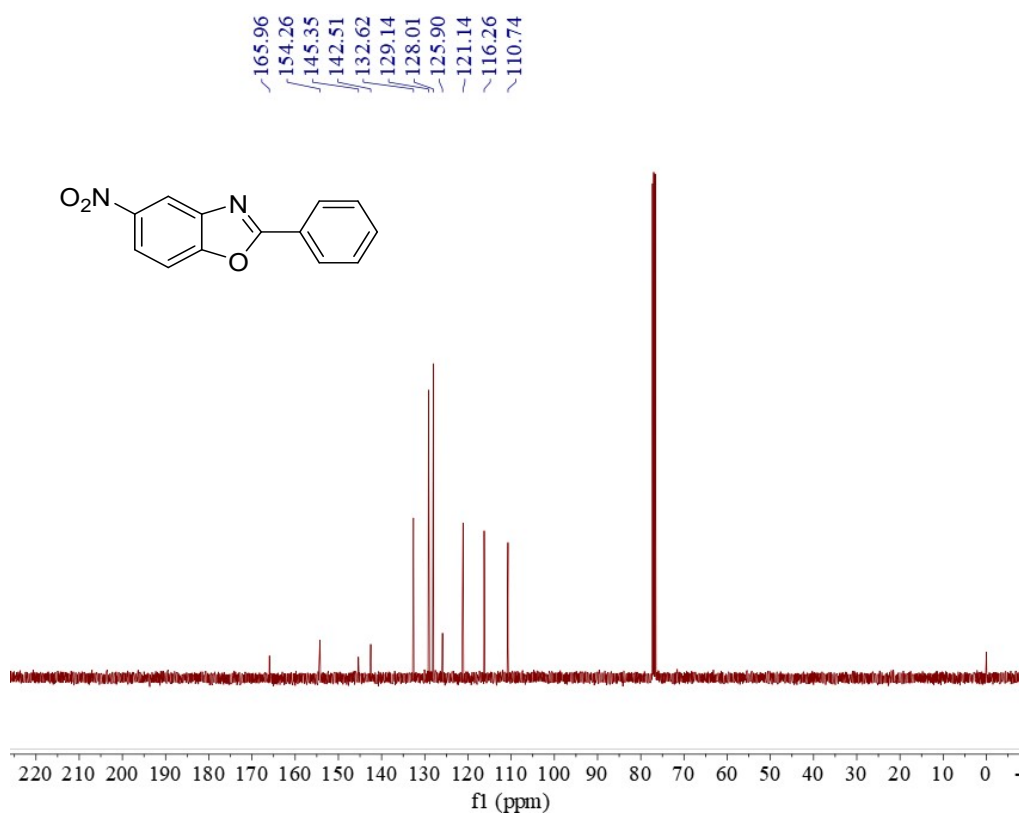

Fig. S65 <sup>13</sup>C NMR of 7i

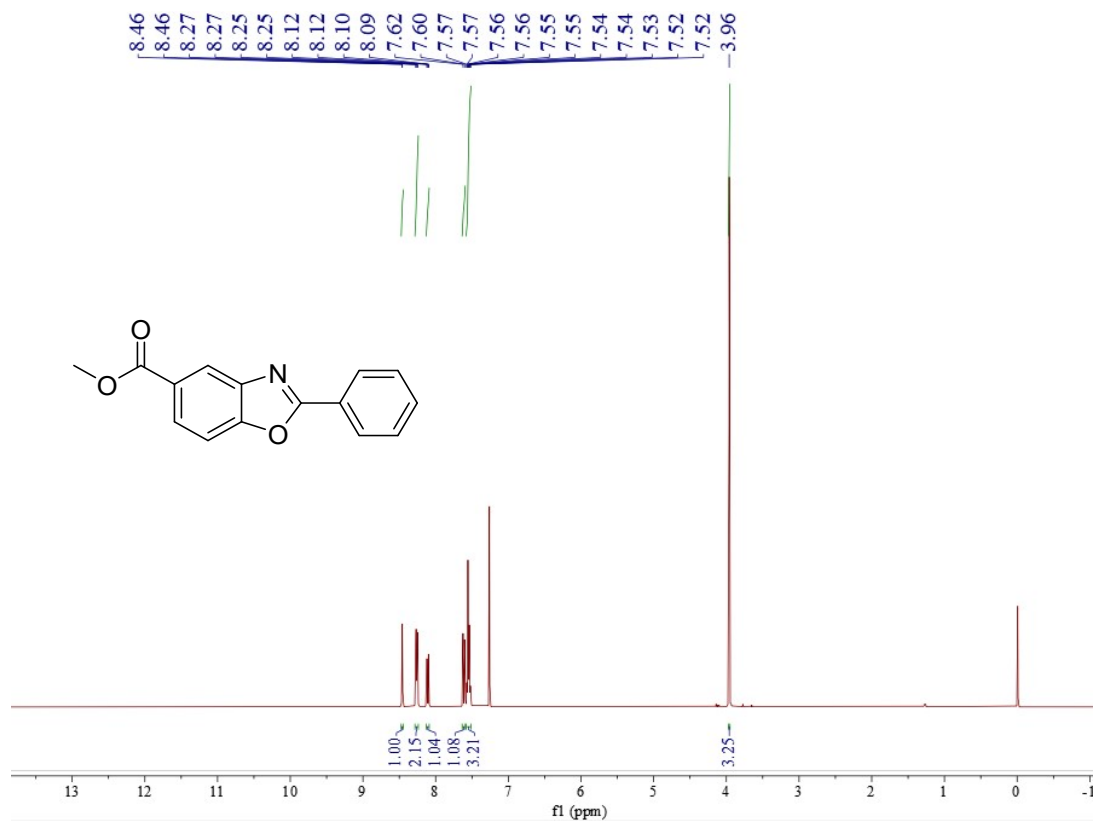

Fig. S66  $^1\text{H}$  NMR of 7j

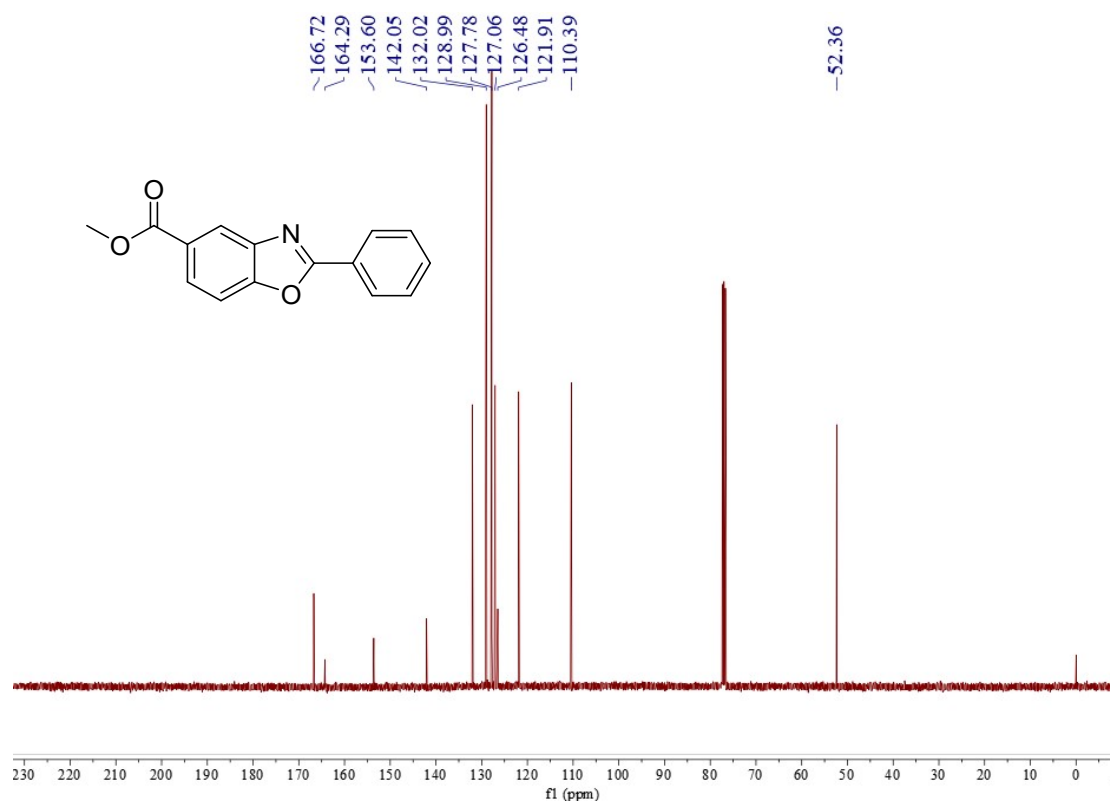

Fig. S67  $^{13}\text{C}$  NMR of 7j

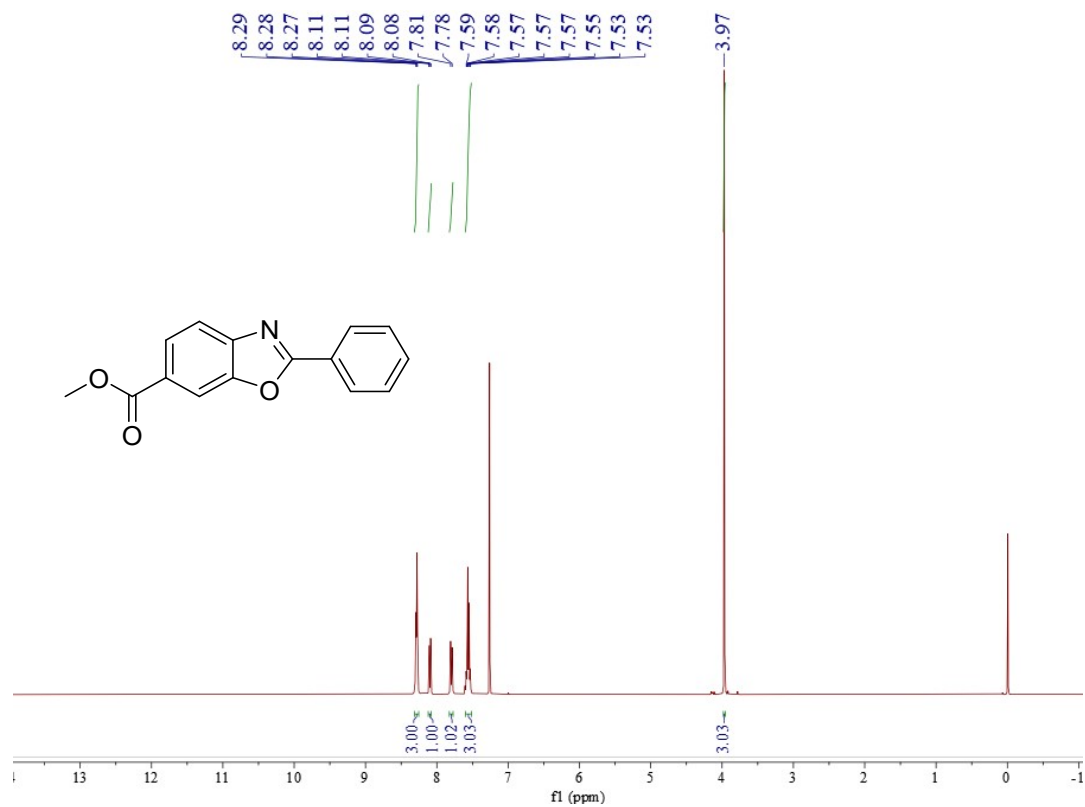

Fig. S68  $^1\text{H NMR}$  of 7k

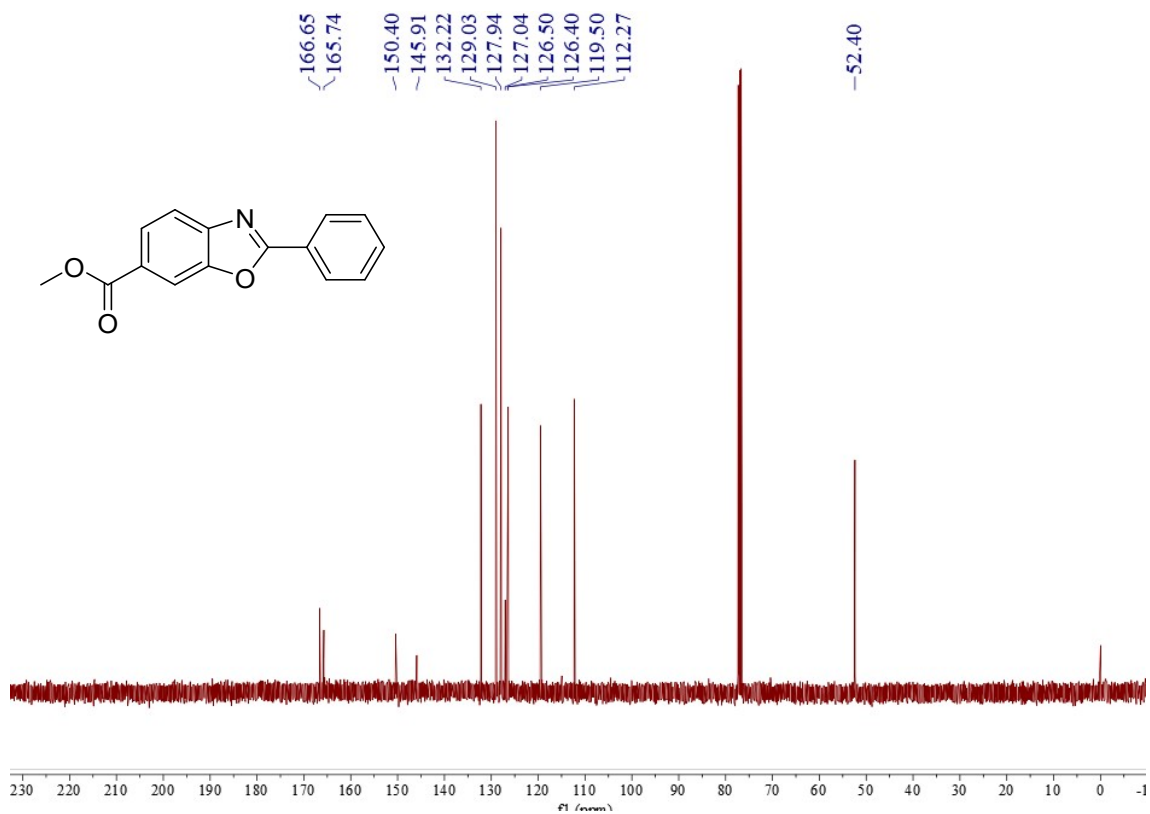

Fig. S69  $^{13}\text{C NMR}$  of 7k

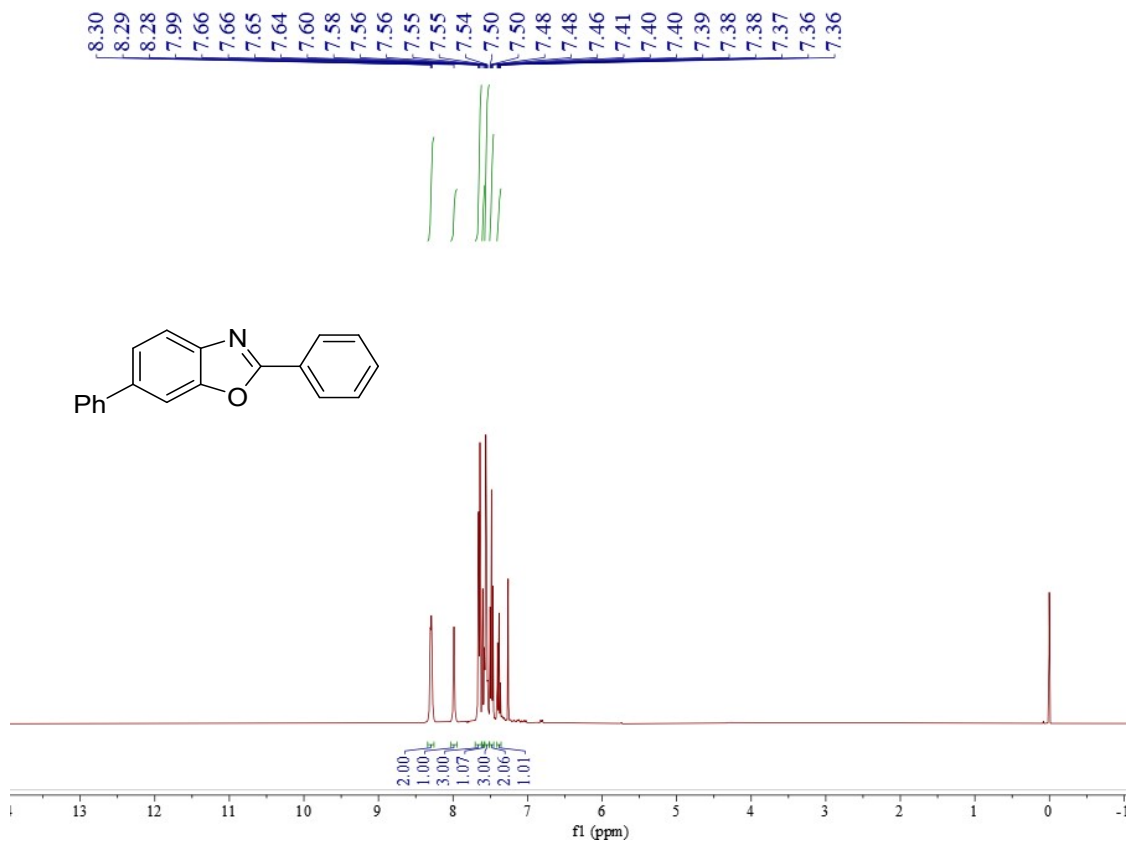

Fig. S70 <sup>1</sup>H NMR of 71

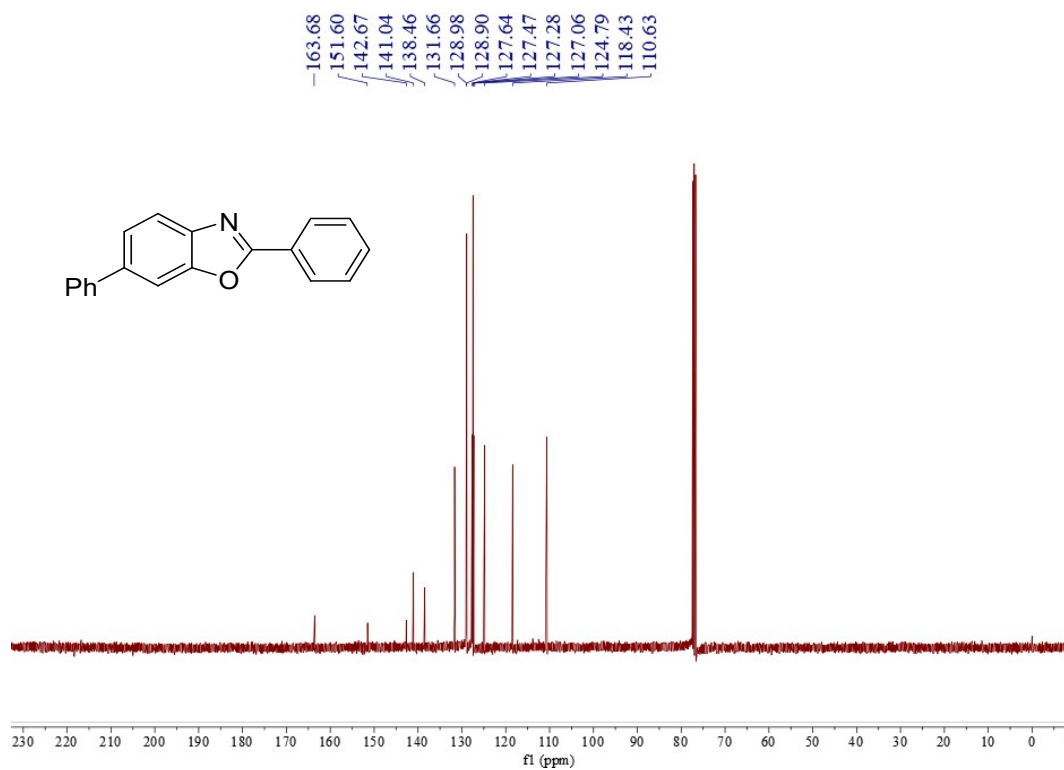

Fig. S71 <sup>13</sup>C NMR of 71

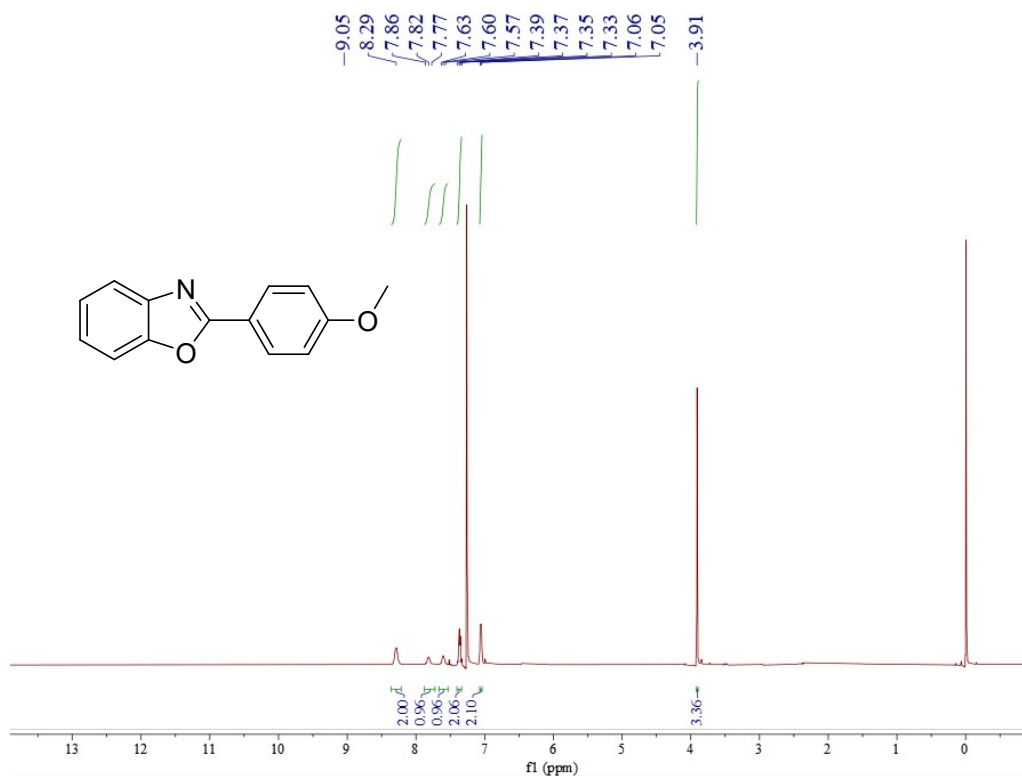

Fig. S72  $^1\text{H}$  NMR of 7m

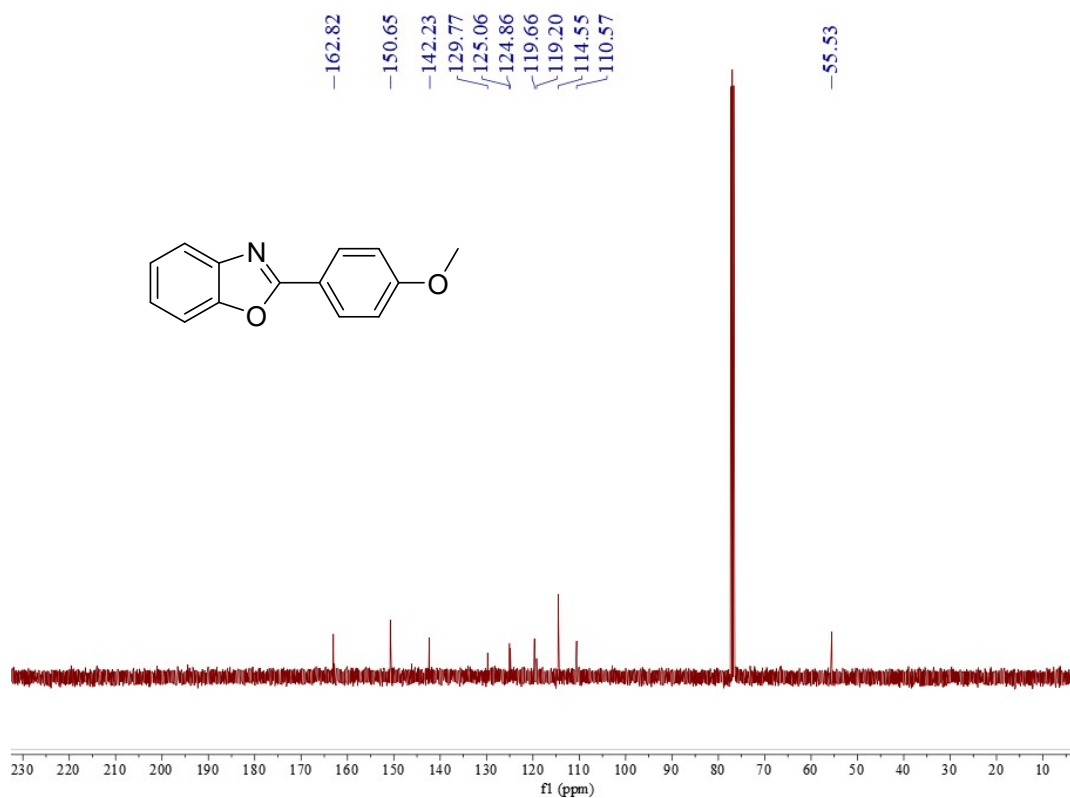

Fig. S73  $^{13}\text{C}$  NMR of 7m

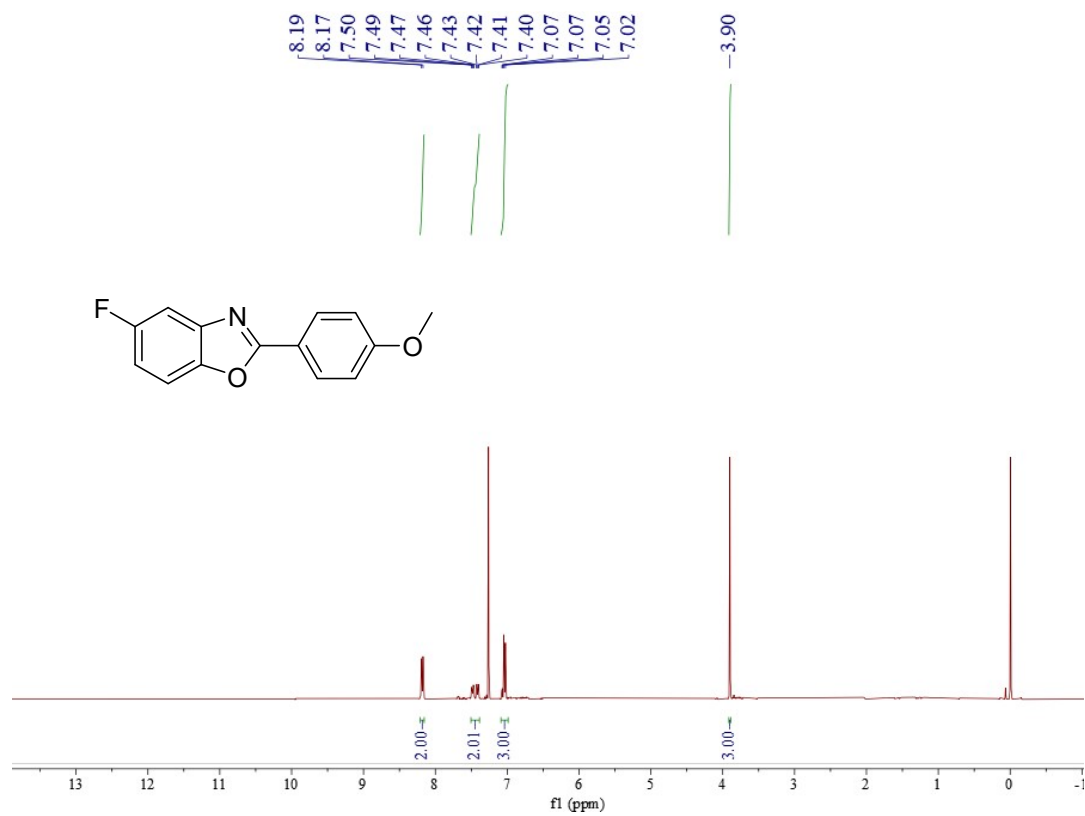

Fig. S74 <sup>1</sup>H NMR of 7n

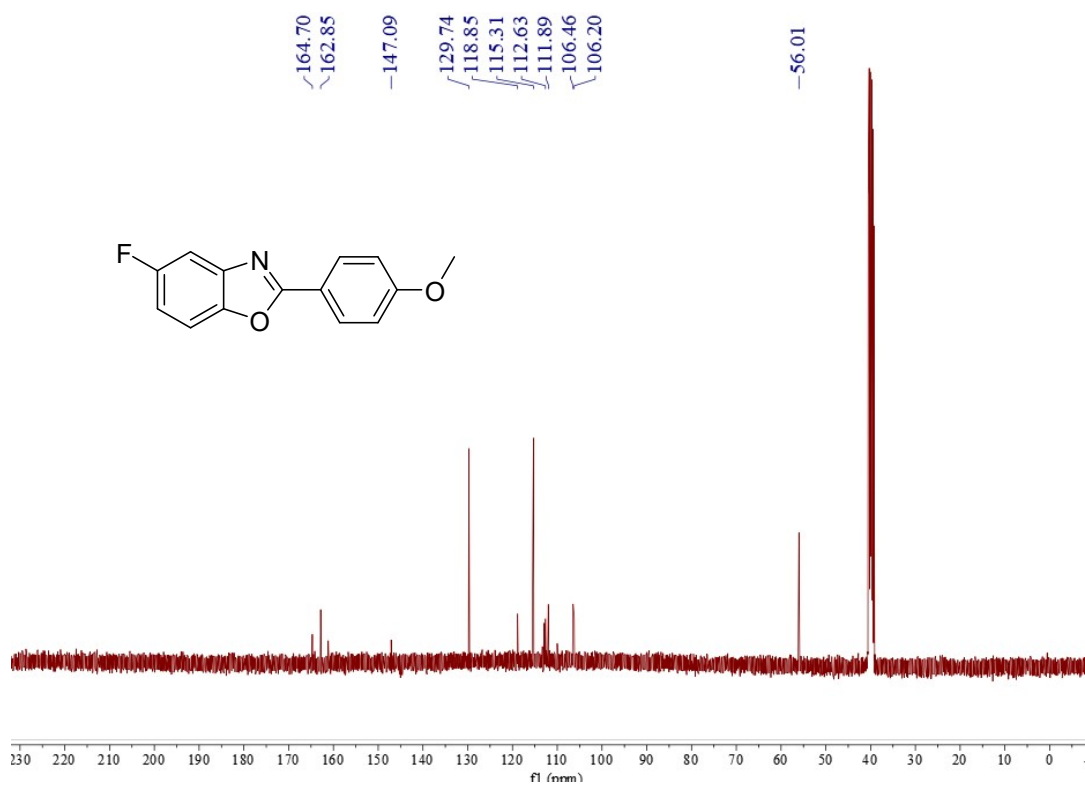

Fig. S75 <sup>13</sup>C NMR of 7n

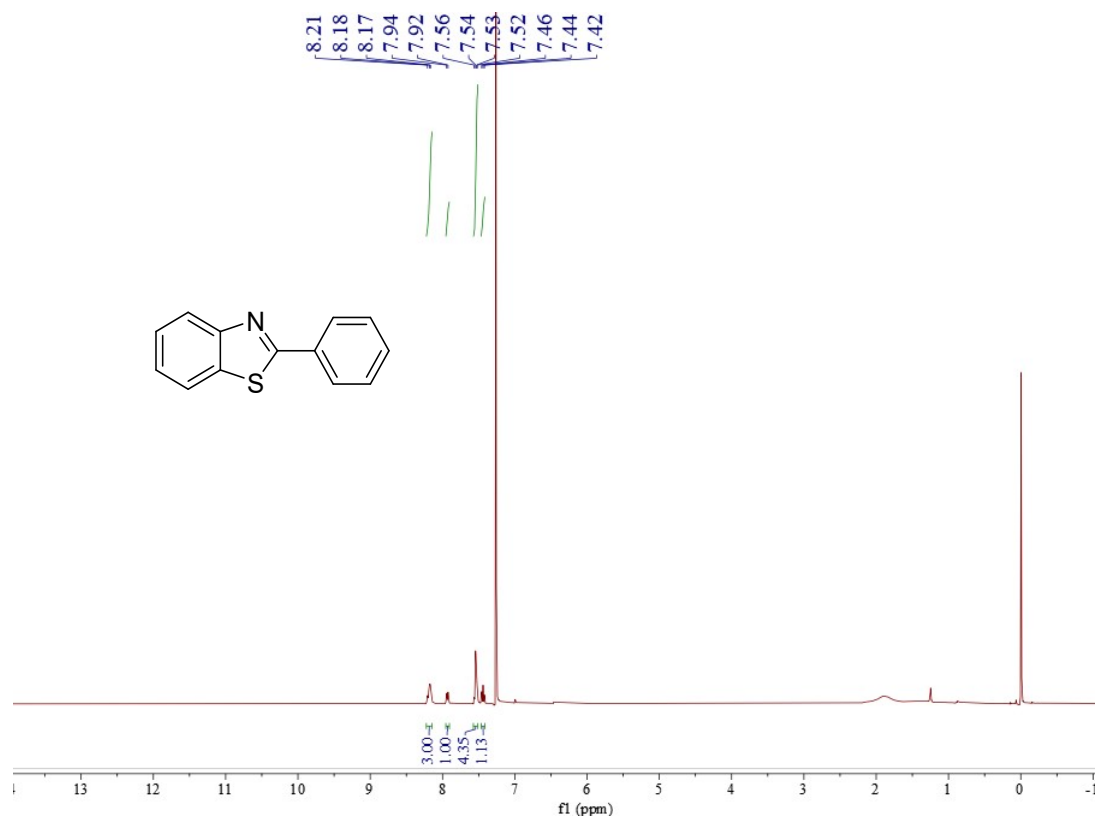

Fig. S76 <sup>1</sup>H NMR of 7o

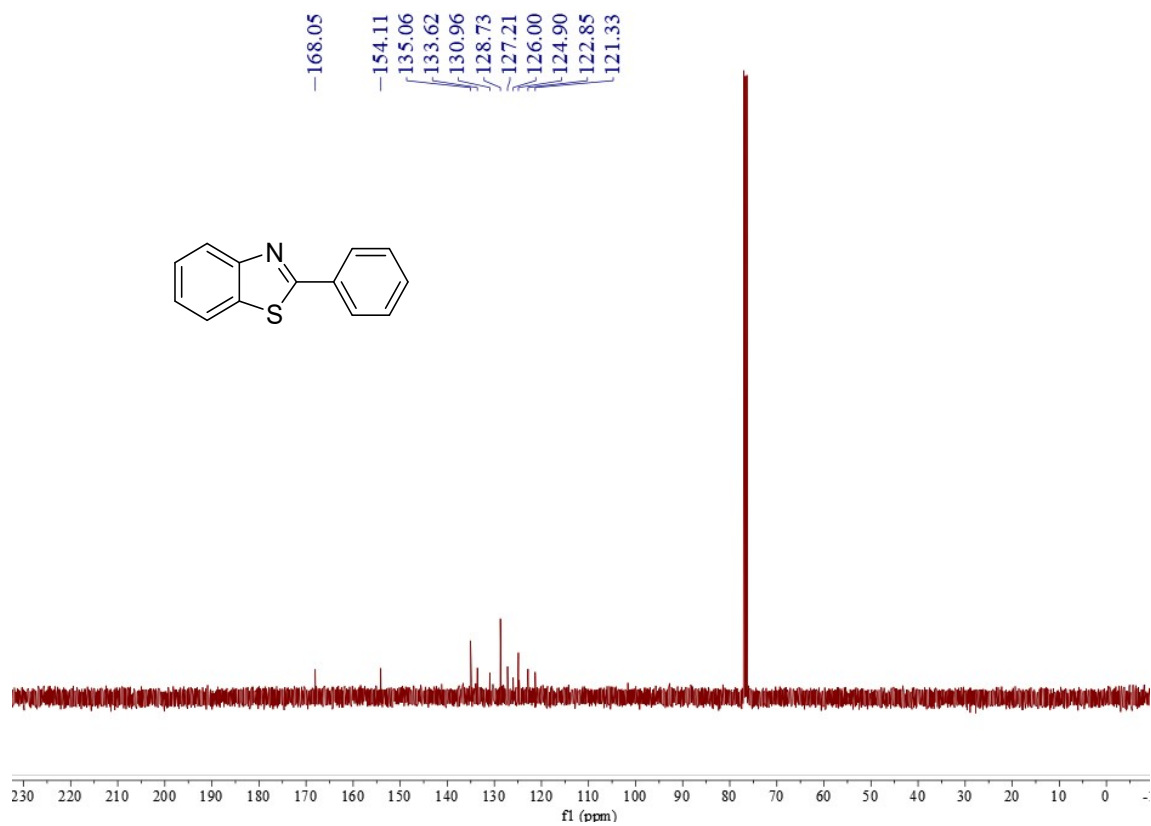

Fig. S77 <sup>13</sup>C NMR of 7o

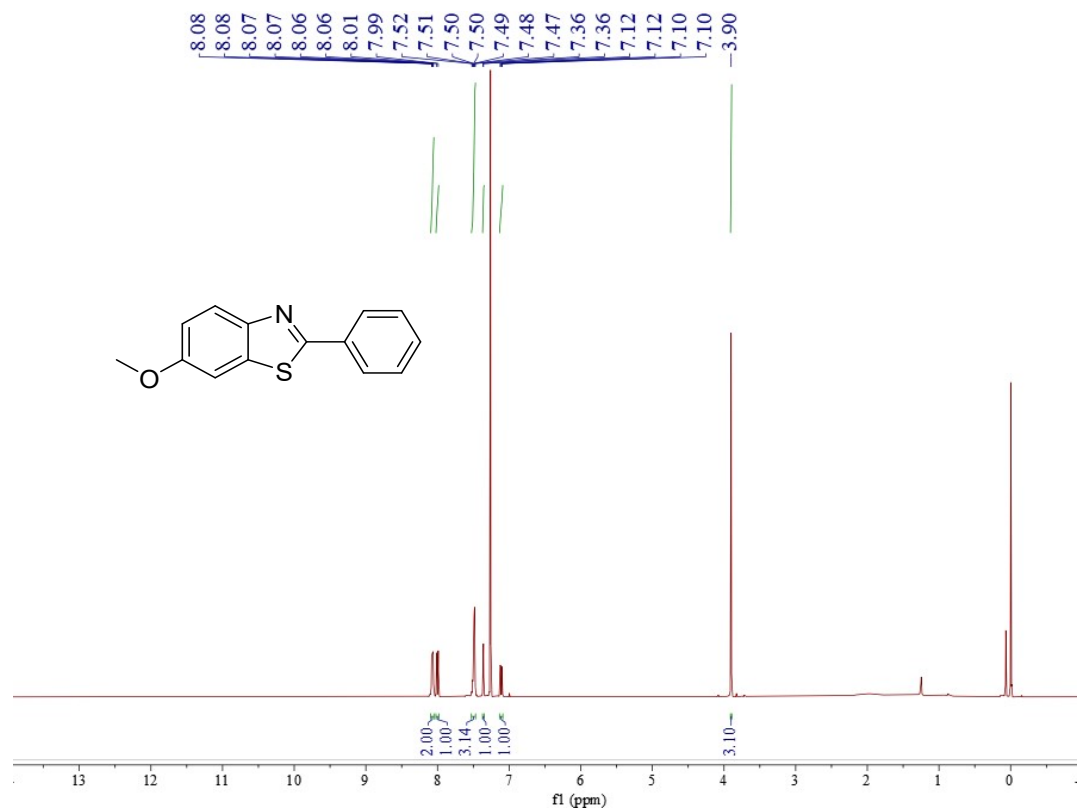

Fig. S78 <sup>1</sup>H NMR of 7p

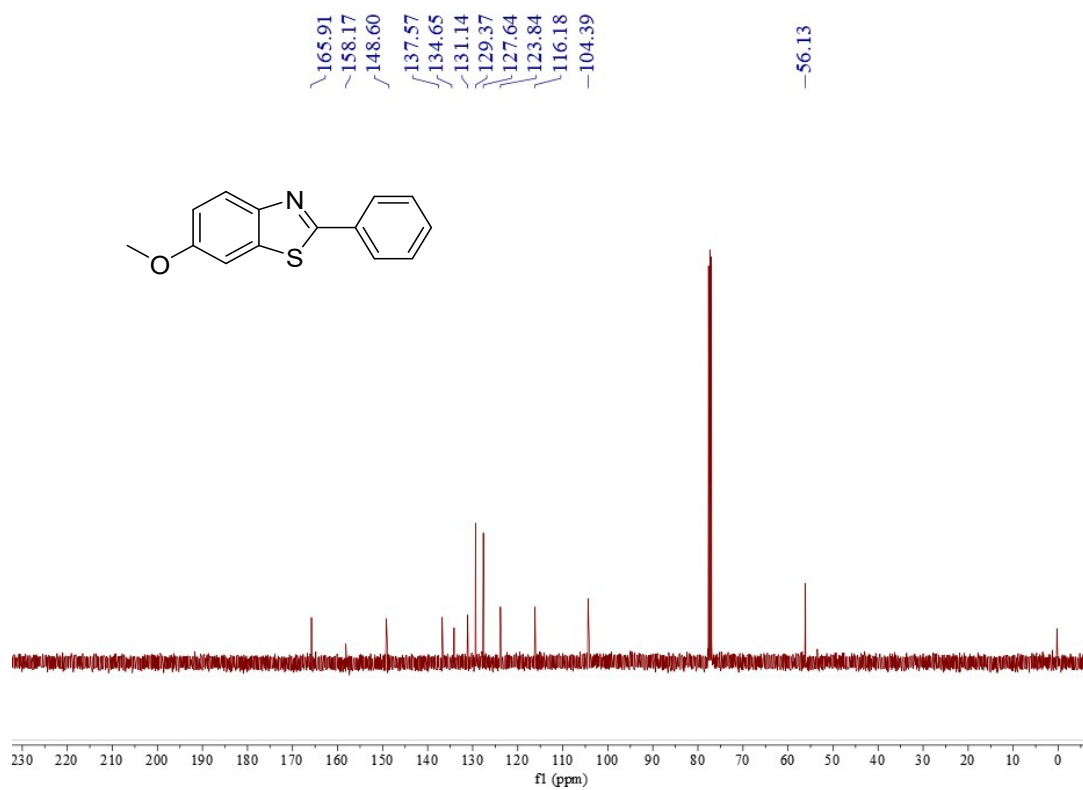

Fig. S79 <sup>13</sup>C NMR of 7p



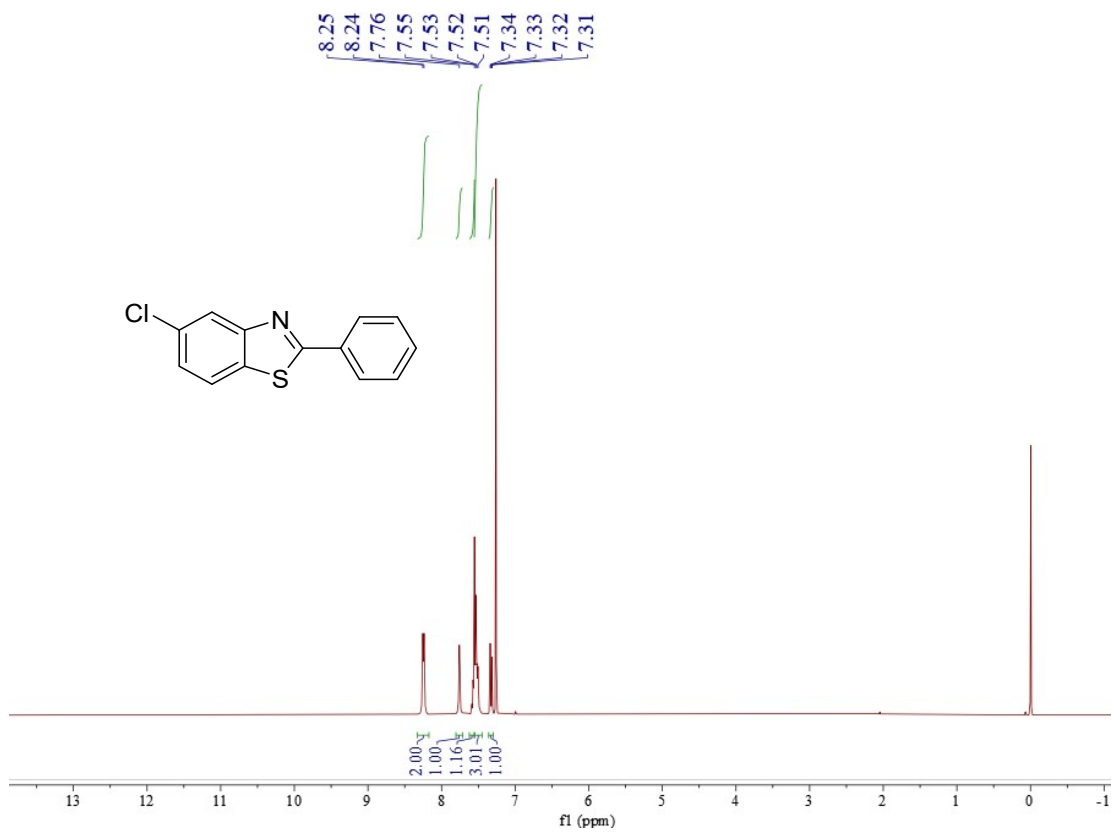

Fig. S80 <sup>1</sup>H NMR of 7q

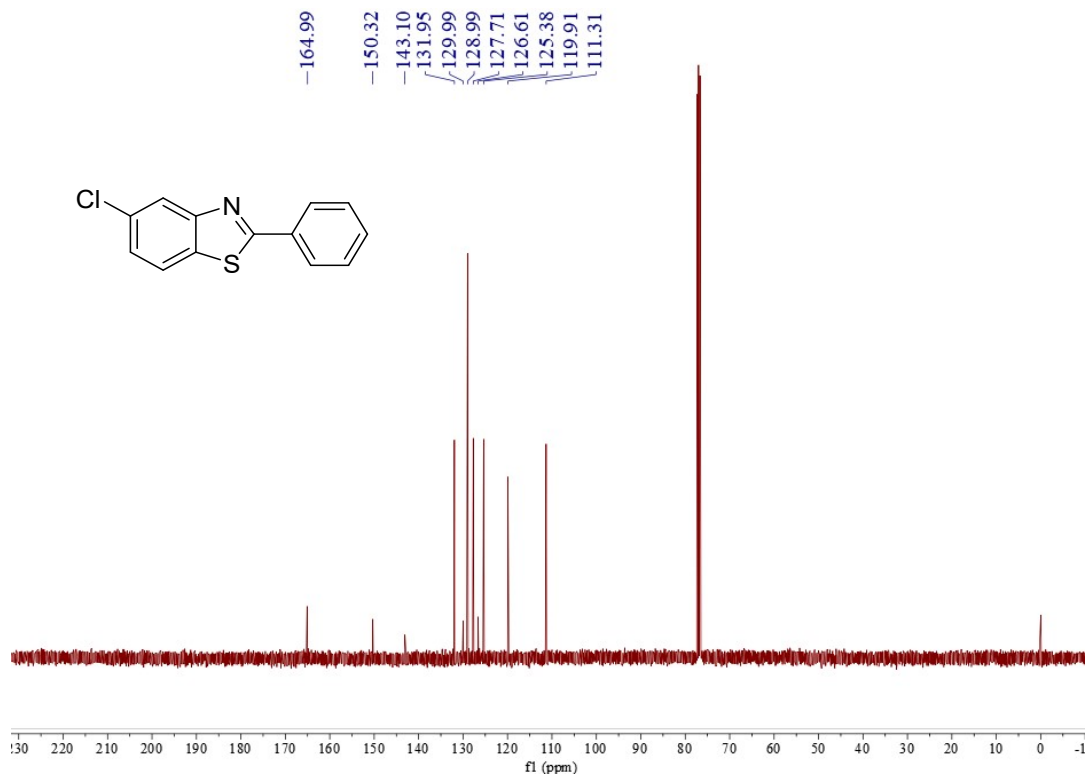

Fig. S81 <sup>13</sup>C NMR of 7q

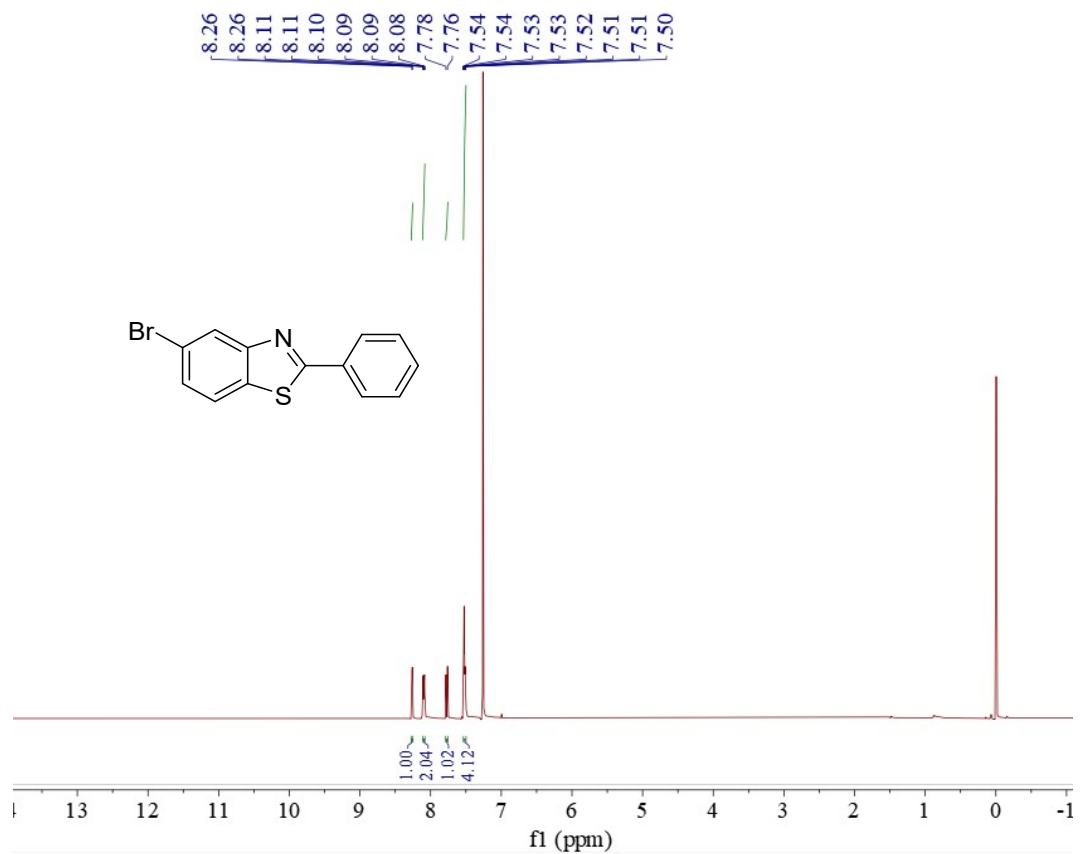

Fig. S82  $^1\text{H}$  NMR of 7r

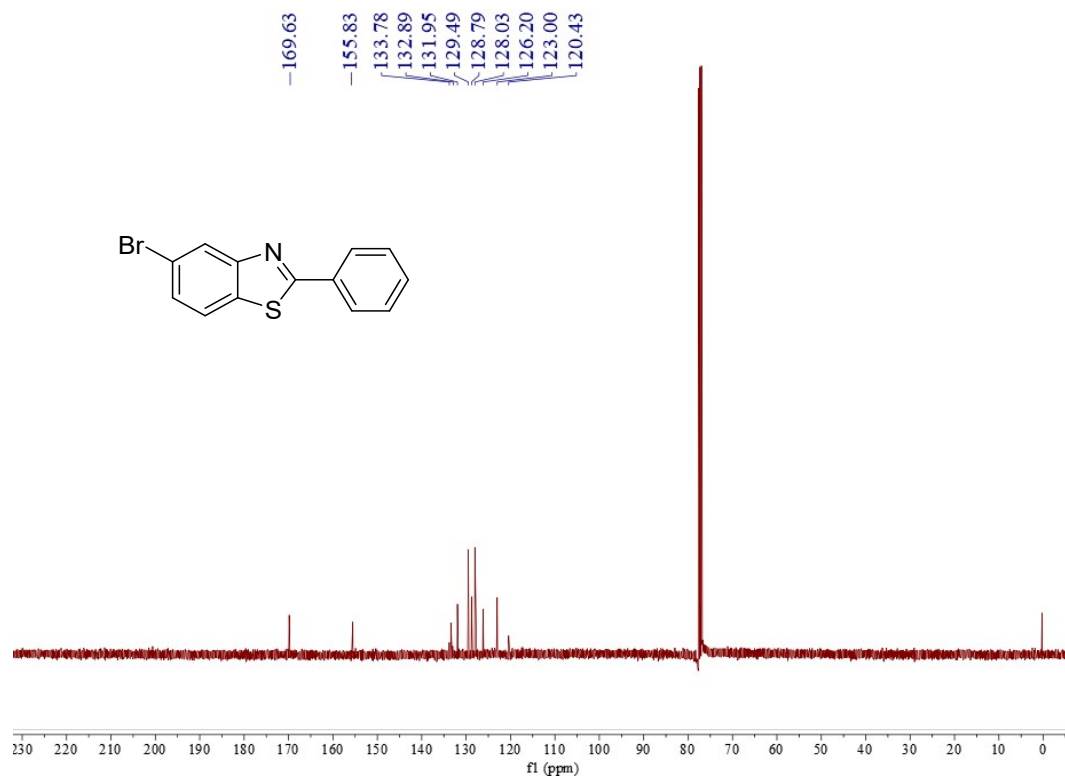

Fig. S83  $^{13}\text{C}$  NMR of 7r

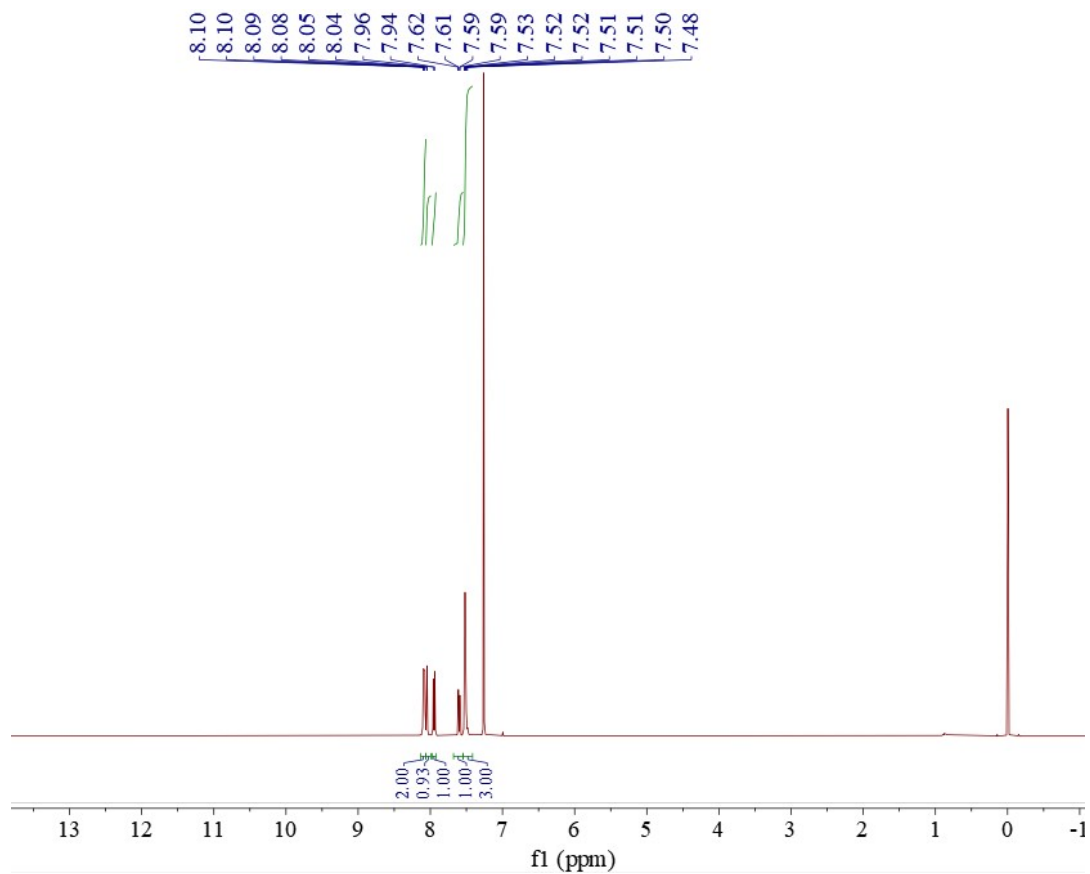

Fig. S84  $^1\text{H}$  NMR of 7s

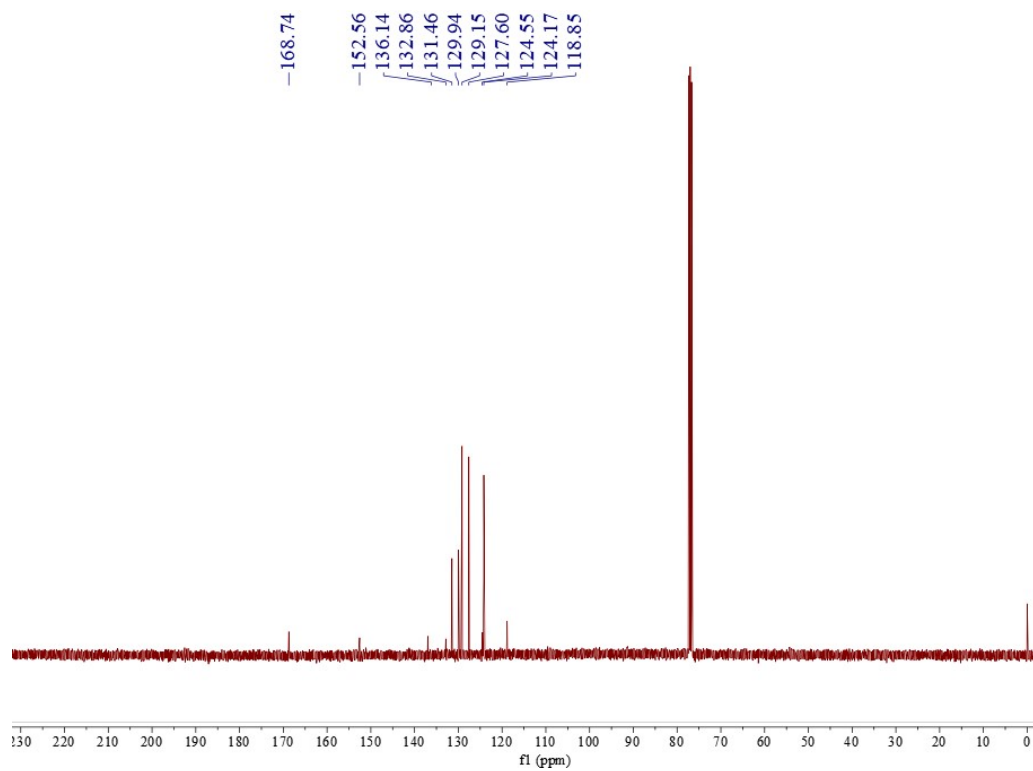

Fig. S85  $^{13}\text{C}$  NMR of 7s

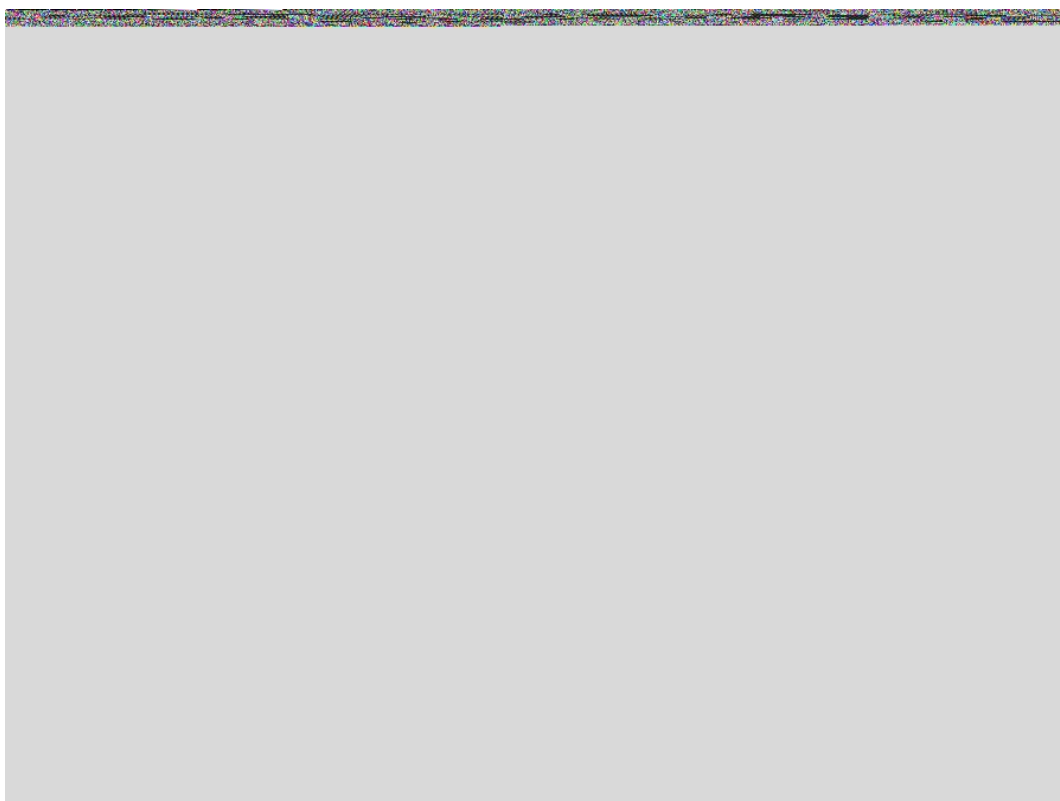

**Fig. S86** <sup>1</sup>H NMR of 7t

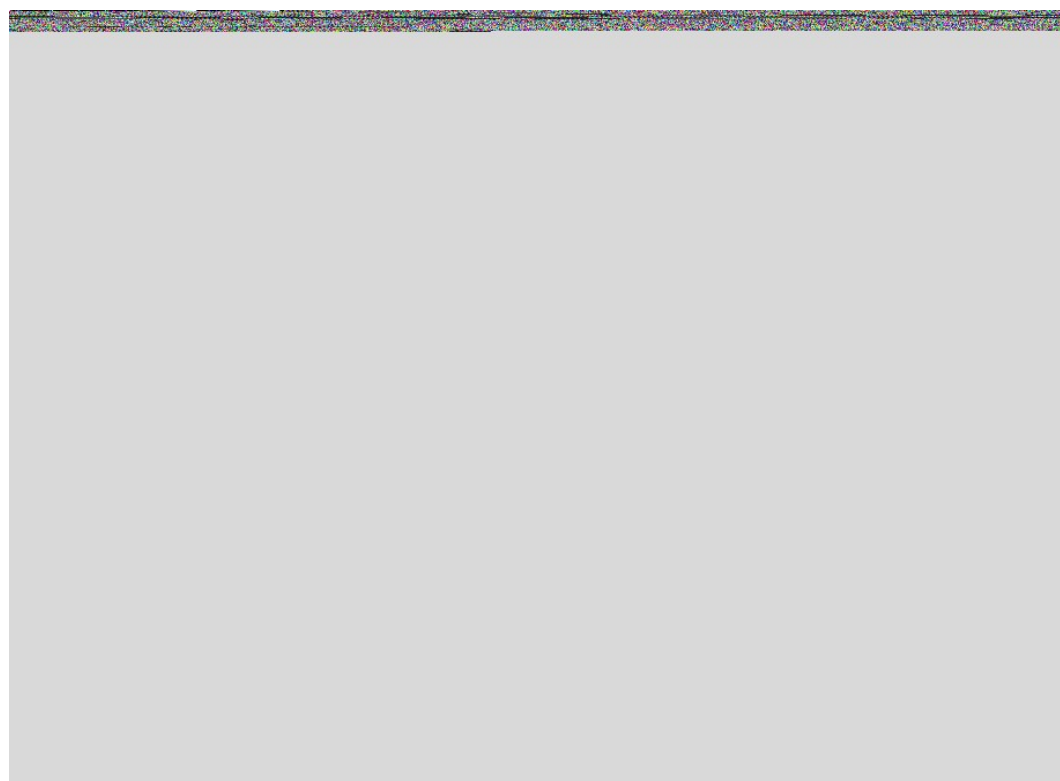

**Fig. S87** <sup>13</sup>C NMR of 7t

- [1] J. Gómez-González , Y. Pérez, G. Sciortino, L. Roldan-Martín, J. Martínez-Costas, J.-D. Maréchal, I. Alfonso, M. V. López, M. E. Vázquez, Dynamic stereoselection of peptide helicates and their selective labeling of DNA replication foci in cells, *Angew. Chem. Int. Ed.* 60(2020) 8859–8866.
